# Supplementary material for: Epigenetic signature of human immune aging in the GESTALT study
Source: eLife. 2023 Aug 17;12:e86136. doi: 10.7554/eLife.86136 (PMC10506794; doi:10.7554/eLife.86136)
Supplement: Supplementary file 1. — Details of the age and sex distribution of the healthy donors from the GESTALT study for each of the primary immune cell-type population are described. The flow cytometry markers for cell selection are also mentioned. [file elife-86136-supp1.xlsx]

## Sheet: Table S1
Supplementary File 1: Demographic and flow cytometry marker details of the cohort.
			Age groups
Cell	Total	Males/Females	20s	30s	40s	50s	60s	70s	80s	Sorting markers
BN	49	31/18	8	7	5	7	9	10	3	CD19+CD27- CD38+
CD4N	48	30/18	7	7	6	7	8	8	5	CD4+CD62L+ CD45RA+
CD8N	41	24/17	9	7	6	8	8	3	0	CD8+CD62L+ CD45RA+
Mono	52	32/20	8	7	6	8	9	8	6	CD3-CD91+CD14+
NK	42	29/13	8	8	5	5	6	6	4	CD3-CD56+CD16+
Granulo	40	24/16	8	6	4	4	4	8	6	Magnetic enrichment
PBMC	55	34/21	9	7	6	8	9	10	6	NA
