# Supplementary material for: Epigenetic signature of human immune aging in the GESTALT study
Source: eLife. 2023 Aug 17;12:e86136. doi: 10.7554/eLife.86136 (PMC10506794; doi:10.7554/eLife.86136)
Supplement: Supplementary file 2. — The top 500 CpG sites corresponding to PC1, PC2, and PC3 components were annotated to genes followed by gene enrichment analysis. Age-associated genes in each pathway are in column M. [file elife-86136-supp2.xlsx]

## Sheet: TableS2
Supplementary File 2: Pathway enrichment analysis of genes annotated to top 500 probes corresponding to PC1, PC2 and PC3 components of Principal Component Analysis(PCA)
Gene_Set	Dir	PC	ID	Pathway	b	B	n	N	E	p_Val	q_Val	Genes_in_Pathway
Hallmarks	Pos	PC1	M5950	Hallmark allograft rejection	13	200	243	26167	6.9994	5.276e-08	2.638e-06	PTPRC,LCK,CD247,ZAP70,B2M,FASLG,CD7,CCND3,ETS1,ITK,EIF3J,HIF1A,TAP1
Hallmarks	Pos	PC1	M5932	Hallmark inflammatory response	11	200	243	26167	5.92257	2.93577e-06	7.33943e-05	CCR7,NFKB1,CD48,CXCR6,LCK,HIF1A,RASGRP1,IFITM1,LTA,PIK3R5,IRF1
Hallmarks	Pos	PC1	M5902	Hallmark apoptosis	9	161	243	26167	6.01955	2.07729e-05	0.000346215	DIABLO,FASLG,SATB1,IRF1,CDC25B,TAP1,EBP,ANKH,ISG20
Hallmarks	Pos	PC1	M5942	Hallmark uv response dn	8	144	243	26167	5.9824	6.26544e-05	0.00078318	MAP2K5,ADD3,RUNX1,ATP2B4,AMPH,FYN,NFKB1,ICA1
Hallmarks	Pos	PC1	M5923	Hallmark pi3k akt mtor signaling	6	105	243	26167	6.15332	0.000450938	0.00450938	MAPK1,E2F1,RPTOR,SLA,FASLG,LCK
Hallmarks	Pos	PC1	M5953	Hallmark kras signaling up	8	199	243	26167	4.32897	0.000570054	0.00475045	ETS1,SATB1,LAPTM5,SPON1,ANKH,ST6GAL1,IKZF1,CCSER2
Hallmarks	Pos	PC1	M5911	Hallmark interferon alpha response	5	97	243	26167	5.55068	0.00213463	0.0152474	IFITM1,TAP1,ISG20,IRF1,B2M
Hallmarks	Pos	PC1	M5915	Hallmark apical junction	7	199	243	26167	3.78785	0.00266998	0.0152525	ACTN1,PTPRC,EVL,MYH9,ADAM23,LDLRAP1,ITGA9
Hallmarks	Pos	PC1	M5921	Hallmark complement	7	200	243	26167	3.76891	0.00274545	0.0152525	SPOCK2,IRF1,RASGRP1,LCK,FYN,PIK3R5,ERAP2
Hallmarks	Pos	PC1	M5947	Hallmark il2 stat5 signaling	6	198	243	26167	3.26313	0.01069	0.0466363	BCL2,CD48,SNX9,PRKCH,CDC42SE2,CCND3
Hallmarks	Pos	PC1	M5913	Hallmark interferon gamma response	6	199	243	26167	3.24673	0.0109393	0.0466363	TAP1,IRF1,ISG20,HIF1A,B2M,NFKB1
Hallmarks	Pos	PC1	M5907	Hallmark estrogen response late	6	200	243	26167	3.23049	0.0111927	0.0466363	ISG20,PRLR,BCL2,RPS6KA2,ATP2B4,ADD3
Hallmarks	Pos	PC1	M5908	Hallmark androgen response	4	100	243	26167	4.30733	0.0142104	0.0546553	B2M,CCND3,ANKH,ACTN1
Hallmarks	Pos	PC1	M5941	Hallmark uv response up	5	158	243	26167	3.40769	0.0162201	0.0579291	RASGRP1,TAP1,CCND3,IRF1,MARK2
Hallmarks	Pos	PC1	M5891	Hallmark hypoxia	5	200	243	26167	2.69208	0.039292	0.109144	ISG20,DTNA,BCL2,MYH9,ETS1
Hallmarks	Pos	PC1	M5906	Hallmark estrogen response early	5	200	243	26167	2.69208	0.039292	0.109144	BCL2,RASGRP1,SVIL,ADD3,RPS6KA2
Hallmarks	Pos	PC1	M5924	Hallmark mtorc1 signaling	5	200	243	26167	2.69208	0.039292	0.109144	SLA,EBP,ADD3,SYTL2,RPA1
Hallmarks	Pos	PC1	M5939	Hallmark p53 pathway	5	200	243	26167	2.69208	0.039292	0.109144	TAP1,PVT1,ZFP36L1,ISCU,CCND3
Hallmarks	Pos	PC2	M5947	Hallmark il2 stat5 signaling	15	198	287	26129	6.89711	5.87952e-09	2.93976e-07	HK2,HIPK2,TNFRSF1B,TIAM1,BCL2,GPR65,KLF6,PLEC,PRKCH,IL10RA,CDCP1,RORA,GSTO1,RABGAP1L,PNP
Hallmarks	Pos	PC2	M5923	Hallmark pi3k akt mtor signaling	7	105	287	26129	6.06945	0.000163009	0.00407523	ACTR3,RPTOR,TIAM1,FASLG,UBE2D3,TNFRSF1A,LCK
Hallmarks	Pos	PC2	M5893	Hallmark mitotic spindle	9	198	287	26129	4.13826	0.000361379	0.00486111	ARHGEF3,TRIO,TIAM1,NCK2,RHOF,PXN,ACTN4,LMNB1,STK38L
Hallmarks	Pos	PC2	M5950	Hallmark allograft rejection	9	200	287	26129	4.09688	0.000388889	0.00486111	PTPRC,LCK,ITGB2,CD247,FASLG,FYB1,ETS1,ITK,GPR65
Hallmarks	Pos	PC2	M5891	Hallmark hypoxia	8	200	287	26129	3.64167	0.00172611	0.0172611	HK2,RORA,KLF6,BCL2,NDST2,LDHC,TES,ETS1
Hallmarks	Pos	PC2	M5942	Hallmark uv response dn	6	144	287	26129	3.79341	0.00525568	0.0377989	ADD3,RUNX1,FYN,SYNJ2,CELF2,TGFBR2
Hallmarks	Pos	PC2	M5953	Hallmark kras signaling up	7	199	287	26129	3.20248	0.00662608	0.0377989	ITGB2,ETS1,SPON1,IL10RA,RABGAP1L,CCSER2,TNFRSF1B
Hallmarks	Pos	PC2	M5924	Hallmark mtorc1 signaling	7	200	287	26129	3.18646	0.0068038	0.0377989	HK2,PNP,ACTR3,UBE2D3,TES,ITGB2,ADD3
Hallmarks	Pos	PC2	M5932	Hallmark inflammatory response	7	200	287	26129	3.18646	0.0068038	0.0377989	IL10RA,TNFRSF1B,SEMA4D,KLF6,LCK,IFITM1,KCNA3
Hallmarks	Pos	PC2	M5896	Hallmark tgf beta signaling	3	54	287	26129	5.05788	0.0215484	0.0980303	SKI,HIPK2,UBE2D3
Hallmarks	Pos	PC2	M5913	Hallmark interferon gamma response	6	199	287	26129	2.74498	0.0230256	0.0980303	IL10RA,SAMHD1,CASP1,PNP,MVP,SLAMF7
Hallmarks	Pos	PC2	M5939	Hallmark p53 pathway	6	200	287	26129	2.73125	0.0235273	0.0980303	DGKA,CASP1,PVT1,PITPNC1,TGFA,ZBTB16
Hallmarks	Pos	PC3	M5950	Hallmark allograft rejection	13	200	237	26176	7.17907	3.91855e-08	1.95927e-06	CD3E,CD3D,CD28,CD3G,HLA-E,CD2,SIT1,APBB1,FYB1,IL16,ETS1,IL4R,PTPN6
Hallmarks	Pos	PC3	M5947	Hallmark il2 stat5 signaling	8	198	237	26176	4.46252	0.000466699	0.0083129	CTLA4,TIAM1,IL4R,LRRC8C,PLEC,ICOS,RHOH,GSTO1
Hallmarks	Pos	PC3	M5906	Hallmark estrogen response early	8	200	237	26176	4.41789	0.000498774	0.0083129	FAM102A,RASGRP1,RARA,TIAM1,BCL11B,FKBP5,ABLIM1,IL6ST
Hallmarks	Pos	PC3	M5915	Hallmark apical junction	7	199	237	26176	3.88508	0.00231825	0.0238424	ACTN1,PBX2,NRXN2,PLCG1,FYB1,CAP1,LDLRAP1
Hallmarks	Pos	PC3	M5907	Hallmark estrogen response late	7	200	237	26176	3.86565	0.00238424	0.0238424	TIAM1,FKBP5,ISG20,FAM102A,ZFP36,IL6ST,PTPN6
Hallmarks	Pos	PC3	M5895	Hallmark wnt beta catenin signaling	3	42	237	26176	7.88909	0.00648614	0.050765	AXIN2,LEF1,TCF7
Hallmarks	Pos	PC3	M5913	Hallmark interferon gamma response	6	199	237	26176	3.33007	0.00973929	0.050765	NLRC5,ISG20,PTPN6,IL4R,AUTS2,NFKB1
Hallmarks	Pos	PC3	M5953	Hallmark kras signaling up	6	199	237	26176	3.33007	0.00973929	0.050765	HSD11B1,ETS1,TRIB1,ST6GAL1,AVL9,CBL
Hallmarks	Pos	PC3	M5890	Hallmark tnfa signaling via nfkb	6	200	237	26176	3.31342	0.00996676	0.050765	ZFP36,NFKB1,TRIB1,IL6ST,IL23A,SMAD3
Hallmarks	Pos	PC3	M5942	Hallmark uv response dn	5	144	237	26176	3.83497	0.010153	0.050765	SMAD3,NR3C1,CDK13,TGFBR2,NFKB1
Hallmarks	Pos	PC3	M5896	Hallmark tgf beta signaling	3	54	237	26176	6.13596	0.0129475	0.0588522	SMURF1,SKI,SMAD3
Hallmarks	Pos	PC3	M5923	Hallmark pi3k akt mtor signaling	4	105	237	26176	4.20751	0.0153755	0.0640646	PLCG1,CAMK4,RPTOR,TIAM1
Hallmarks	Pos	PC3	M5945	Hallmark heme metabolism	5	198	237	26176	2.78907	0.0345697	0.128061	FECH,TOP1,TNRC6B,CDR2,NR3C1
Hallmarks	Pos	PC3	M5891	Hallmark hypoxia	5	200	237	26176	2.76118	0.0358569	0.128061	ISG20,ZFP36,NR3C1,NDST2,ETS1
Hallmarks	Pos	PC3	M5897	Hallmark il6 jak stat3 signaling	3	83	237	26176	3.99207	0.0396831	0.132277	IL4R,IL6ST,CBL
Hallmarks	Neg	PC1	M5932	Hallmark inflammatory response	10	200	278	26128	4.69928	6.03493e-05	0.00301746	AQP9,PTAFR,IFNGR2,NLRP3,CSF3R,ACVR1B,SLC1A2,MXD1,MEFV,PTPRE
Hallmarks	Neg	PC1	M5947	Hallmark il2 stat5 signaling	8	198	278	26128	3.7974	0.00132608	0.0235563	HK2,HIPK2,MXD1,ANXA4,SELP,POU2F1,RNH1,LRIG1
Hallmarks	Neg	PC1	M5890	Hallmark tnfa signaling via nfkb	8	200	278	26128	3.75942	0.00141338	0.0235563	ETS2,RCAN1,SLC2A6,SGK1,IFNGR2,PTPRE,FUT4,MXD1
Hallmarks	Neg	PC1	M5896	Hallmark tgf beta signaling	3	54	278	26128	5.22142	0.0198339	0.138735	HIPK2,RAB31,IFNGR2
Hallmarks	Neg	PC1	M5906	Hallmark estrogen response early	6	200	278	26128	2.81957	0.0205094	0.138735	LRIG1,SCNN1A,RAB31,ADCY9,MED13L,SH3BP5
Hallmarks	Neg	PC1	M5939	Hallmark p53 pathway	6	200	278	26128	2.81957	0.0205094	0.138735	MXD1,PTPRE,ELP1,RHBDF2,RXRA,ACVR1B
Hallmarks	Neg	PC1	M5950	Hallmark allograft rejection	6	200	278	26128	2.81957	0.0205094	0.138735	HLA-DMB,TLR6,ELANE,SPI1,NLRP3,IFNGR2
Hallmarks	Neg	PC1	M5908	Hallmark androgen response	4	100	278	26128	3.75942	0.0221976	0.138735	CAMKK2,SGK1,MERTK,NCOA4
Hallmarks	Neg	PC2	M5893	Hallmark mitotic spindle	7	198	273	26116	3.38203	0.00495714	0.130804	ARHGEF2,CLASP1,KLC1,NIN,TBCD,ARHGEF7,CLIP1
Hallmarks	Neg	PC2	M5907	Hallmark estrogen response late	7	200	273	26116	3.34821	0.00523214	0.130804	SLC22A5,AFF1,MAPK13,LARGE1,ALDH3A2,CD9,SORD
Hallmarks	Neg	PC2	M5913	Hallmark interferon gamma response	6	199	273	26116	2.88431	0.0185756	0.209633	OAS2,PELI1,BANK1,AUTS2,NOD1,ARID5B
Hallmarks	Neg	PC2	M5906	Hallmark estrogen response early	6	200	273	26116	2.86989	0.0189882	0.209633	SYBU,LRIG1,KAZN,SLC22A5,AFF1,INPP5F
Hallmarks	Neg	PC2	M5908	Hallmark androgen response	4	100	273	26116	3.82652	0.0209633	0.209633	SORD,TPD52,PMEPA1,ARID5B
Hallmarks	Neg	PC2	M5903	Hallmark notch signaling	2	32	273	26116	5.97894	0.0439632	0.36636	DTX1,TCF7L2
Hallmarks	Neg	PC3	M5950	Hallmark allograft rejection	11	200	267	26141	5.38485	7.27461e-06	0.00036373	IFNG,CD247,FASLG,PRF1,STAT4,GZMB,KLRD1,ITK,PRKCB,FGR,IL18RAP
Hallmarks	Neg	PC3	M5896	Hallmark tgf beta signaling	4	54	267	26141	7.25232	0.00225395	0.0451097	NCOR2,HIPK2,RAB31,THBS1
Hallmarks	Neg	PC3	M5908	Hallmark androgen response	5	100	267	26141	4.89532	0.00366438	0.0451097	ABCC4,ABHD2,ANKH,ARID5B,PDLIM5
Hallmarks	Neg	PC3	M5893	Hallmark mitotic spindle	7	198	267	26141	3.46134	0.00437551	0.0451097	CLASP1,PREX1,RAB3GAP1,AKAP13,RASAL2,NEDD9,PDLIM5
Hallmarks	Neg	PC3	M5923	Hallmark pi3k akt mtor signaling	5	105	267	26141	4.66221	0.00451097	0.0451097	MAPK1,VAV3,ARF1,PRKCB,FASLG
Hallmarks	Neg	PC3	M5902	Hallmark apoptosis	6	161	267	26141	3.64868	0.00634064	0.0528387	FASLG,CD44,PRF1,TGFBR3,ANKH,NEDD9
Hallmarks	Neg	PC3	M5895	Hallmark wnt beta catenin signaling	3	42	267	26141	6.99331	0.00901726	0.064409	AXIN1,NCOR2,RBPJ
Hallmarks	Neg	PC3	M5910	Hallmark protein secretion	4	95	267	26141	4.12237	0.016415	0.0714648	ARF1,RAB2A,SGMS1,MAPK1
Hallmarks	Neg	PC3	M5930	Hallmark epithelial mesenchymal transition	6	199	267	26141	2.95195	0.0167756	0.0714648	FBN1,THBS1,CD44,TPM4,TGFBR3,SGCG
Hallmarks	Neg	PC3	M5906	Hallmark estrogen response early	6	200	267	26141	2.93719	0.0171515	0.0714648	RAB31,KAZN,CELSR1,ABHD2,CD44,NCOR2
Hallmarks	Neg	PC3	M5907	Hallmark estrogen response late	6	200	267	26141	2.93719	0.0171515	0.0714648	RAB31,DLG5,ABHD2,CD44,JAK1,NCOR2
Hallmarks	Neg	PC3	M5921	Hallmark complement	6	200	267	26141	2.93719	0.0171515	0.0714648	LGMN,APOBEC3G,GZMB,RNF4,FYN,GNG2
Biocarta	Pos	PC1	M19784	Biocarta tcr pathway	8	44	243	26328	19.6992	6.24477e-09	1.82347e-06	PIK3R1,CD247,ZAP70,NFATC2,FYN,LCK,NFKB1,LAT
Biocarta	Pos	PC1	M10765	Biocarta tcra pathway	5	12	243	26328	45.144	4.82913e-08	7.05053e-06	CD247,ZAP70,FYN,LCK,PTPRC
Biocarta	Pos	PC1	M19118	Biocarta keratinocyte pathway	7	46	243	26328	16.4874	2.06149e-07	2.00652e-05	FASLG,BCL2,PRKCH,ETS1,MAPK1,PRKCQ,NFKB1
Biocarta	Pos	PC1	M8615	Biocarta il2rb pathway	6	37	243	26328	17.5696	1.06328e-06	7.76195e-05	FASLG,PIK3R1,BCL2,IKZF3,MAPK1,E2F1
Biocarta	Pos	PC1	M1296	Biocarta il7 pathway	4	16	243	26328	27.0864	1.18091e-05	0.000689649	PIK3R1,BCL2,FYN,LCK
Biocarta	Pos	PC1	M6327	Biocarta csk pathway	4	20	243	26328	21.6691	3.05366e-05	0.00127381	CD247,ZAP70,LCK,PTPRC
Biocarta	Pos	PC1	M1467	Biocarta ctla4 pathway	4	20	243	26328	21.6691	3.05366e-05	0.00127381	PIK3R1,CD247,LCK,ITK
Biocarta	Pos	PC1	M14512	Biocarta raccycd pathway	4	26	243	26328	16.6686	9.02134e-05	0.00329279	PIK3R1,MAPK1,NFKB1,E2F1
Biocarta	Pos	PC1	M1462	Biocarta ctl pathway	3	13	243	26328	25.0028	0.000207425	0.00672979	FASLG,CD247,B2M
Biocarta	Pos	PC1	M14863	Biocarta p53 pathway	3	16	243	26328	20.3148	0.000397912	0.011619	BCL2,ATM,E2F1
Biocarta	Pos	PC1	M8353	Biocarta hcmv pathway	3	17	243	26328	19.1198	0.000479893	0.0116774	PIK3R1,MAPK1,NFKB1
Biocarta	Pos	PC1	M14449	Biocarta ets pathway	3	17	243	26328	19.1198	0.000479893	0.0116774	ETV3,ETS1,E2F1
Biocarta	Pos	PC1	M10145	Biocarta pten pathway	3	18	243	26328	18.0576	0.000571958	0.0128471	FASLG,PIK3R1,MAPK1
Biocarta	Pos	PC1	M882	Biocarta cxcr4 pathway	3	19	243	26328	17.1072	0.000674587	0.013132	PIK3R1,MAPK1,NFKB1
Biocarta	Pos	PC1	M6355	Biocarta ecm pathway	3	19	243	26328	17.1072	0.000674587	0.013132	PIK3R1,FYN,MAPK1
Biocarta	Pos	PC1	M16355	Biocarta nkcells pathway	3	20	243	26328	16.2519	0.000788242	0.0143854	PIK3R1,B2M,LAT
Biocarta	Pos	PC1	M19943	Biocarta ceramide pathway	3	21	243	26328	15.478	0.000913375	0.014817	BCL2,MAPK1,NFKB1
Biocarta	Pos	PC1	M5202	Biocarta p53hypoxia pathway	3	21	243	26328	15.478	0.000913375	0.014817	ATM,RPA1,HIF1A
Biocarta	Pos	PC1	M15258	Biocarta akt pathway	3	22	243	26328	14.7744	0.00105042	0.0161433	FASLG,PIK3R1,NFKB1
Biocarta	Pos	PC1	M85	Biocarta bad pathway	3	24	243	26328	13.5432	0.00136189	0.0198836	PIK3R1,BCL2,MAPK1
Biocarta	Pos	PC1	M22031	Biocarta cdc25 pathway	2	9	243	26328	24.0768	0.00292642	0.0388415	CDC25B,ATM
Biocarta	Pos	PC1	M16519	Biocarta tcapoptosis pathway	2	9	243	26328	24.0768	0.00292642	0.0388415	FASLG,CD247
Biocarta	Pos	PC1	M10287	Biocarta fmlp pathway	3	34	243	26328	9.55991	0.00376236	0.0457754	NFATC2,MAPK1,NFKB1
Biocarta	Pos	PC1	M3342	Biocarta integrin pathway	3	34	243	26328	9.55991	0.00376236	0.0457754	FYN,MAPK1,ACTN1
Biocarta	Pos	PC1	M6917	Biocarta eponfkb pathway	2	11	243	26328	19.6992	0.00441681	0.0515884	HIF1A,NFKB1
Biocarta	Pos	PC1	M22023	Biocarta mhc pathway	2	12	243	26328	18.0576	0.00526804	0.0549382	TAP1,B2M
Biocarta	Pos	PC1	M13247	Biocarta tcytotoxic pathway	2	12	243	26328	18.0576	0.00526804	0.0549382	CD247,PTPRC
Biocarta	Pos	PC1	M6427	Biocarta thelper pathway	2	12	243	26328	18.0576	0.00526804	0.0549382	CD247,PTPRC
Biocarta	Pos	PC1	M1908	Biocarta fcer1 pathway	3	39	243	26328	8.33428	0.00555503	0.0559334	PIK3R1,NFATC2,MAPK1
Biocarta	Pos	PC1	M22007	Biocarta pcaf pathway	2	13	243	26328	16.6686	0.00618816	0.0582884	IRF1,NFKB1
Biocarta	Pos	PC1	M18159	Biocarta rb pathway	2	13	243	26328	16.6686	0.00618816	0.0582884	CDC25B,ATM
Biocarta	Pos	PC1	M13863	Biocarta mapk pathway	4	81	243	26328	5.3504	0.00676162	0.0598668	MAP2K5,MAPK1,NFKB1,RPS6KA2
Biocarta	Pos	PC1	M16811	Biocarta erk5 pathway	2	14	243	26328	15.478	0.00717581	0.0598668	PIK3R1,MAPK1
Biocarta	Pos	PC1	M16884	Biocarta ach pathway	2	14	243	26328	15.478	0.00717581	0.0598668	FASLG,PIK3R1
Biocarta	Pos	PC1	M2587	Biocarta hsp27 pathway	2	14	243	26328	15.478	0.00717581	0.0598668	FASLG,BCL2
Biocarta	Pos	PC1	M6231	Biocarta no2il12 pathway	2	15	243	26328	14.4461	0.00822971	0.0667521	CD247,IL12RB2
Biocarta	Pos	PC1	M4388	Biocarta cdmac pathway	2	16	243	26328	13.5432	0.00934853	0.0737776	MAPK1,NFKB1
Biocarta	Pos	PC1	M10066	Biocarta gcr pathway	2	17	243	26328	12.7466	0.010531	0.0788476	PIK3R1,NFKB1
Biocarta	Pos	PC1	M11358	Biocarta arf pathway	2	17	243	26328	12.7466	0.010531	0.0788476	PIK3R1,E2F1
Biocarta	Pos	PC1	M2288	Biocarta nfat pathway	3	51	243	26328	6.37328	0.0116756	0.0838674	PIK3R1,NFATC2,MAPK1
Biocarta	Pos	PC1	M3873	Biocarta chemical pathway	2	18	243	26328	12.0384	0.0117759	0.0838674	BCL2,ATM
Biocarta	Pos	PC1	M22013	Biocarta erad pathway	2	19	243	26328	11.4048	0.0130819	0.0848873	MAN1C1,SAE1
Biocarta	Pos	PC1	M4319	Biocarta il12 pathway	2	19	243	26328	11.4048	0.0130819	0.0848873	CD247,IL12RB2
Biocarta	Pos	PC1	M16257	Biocarta mitochondria pathway	2	19	243	26328	11.4048	0.0130819	0.0848873	BCL2,DIABLO
Biocarta	Pos	PC1	M3494	Biocarta par1 pathway	2	19	243	26328	11.4048	0.0130819	0.0848873	PIK3R1,GNA13
Biocarta	Pos	PC1	M10628	Biocarta atm pathway	2	20	243	26328	10.8346	0.0144479	0.0897615	ATM,NFKB1
Biocarta	Pos	PC1	M11106	Biocarta gsk3 pathway	2	20	243	26328	10.8346	0.0144479	0.0897615	PIK3R1,NFKB1
Biocarta	Pos	PC1	M13968	Biocarta hivnef pathway	3	56	243	26328	5.80423	0.0150287	0.0914247	FASLG,BCL2,NFKB1
Biocarta	Pos	PC1	M10579	Biocarta edg1 pathway	2	22	243	26328	9.84961	0.0173548	0.0993648	PIK3R1,MAPK1
Biocarta	Pos	PC1	M17294	Biocarta ras pathway	2	22	243	26328	9.84961	0.0173548	0.0993648	PIK3R1,NFKB1
Biocarta	Pos	PC1	M9070	Biocarta creb pathway	2	22	243	26328	9.84961	0.0173548	0.0993648	PIK3R1,MAPK1
Biocarta	Pos	PC1	M17770	Biocarta cellcycle pathway	2	23	243	26328	9.42136	0.0188934	0.102164	CCND3,E2F1
Biocarta	Pos	PC1	M19613	Biocarta igf1r pathway	2	23	243	26328	9.42136	0.0188934	0.102164	PIK3R1,MAPK1
Biocarta	Pos	PC1	M18719	Biocarta her2 pathway	2	23	243	26328	9.42136	0.0188934	0.102164	PIK3R1,MAPK1
Biocarta	Pos	PC1	M8560	Biocarta g2 pathway	2	24	243	26328	9.02881	0.0204872	0.104952	CDC25B,ATM
Biocarta	Pos	PC1	M4791	Biocarta eif4 pathway	2	24	243	26328	9.02881	0.0204872	0.104952	PIK3R1,MAPK1
Biocarta	Pos	PC1	M15926	Biocarta tff pathway	2	24	243	26328	9.02881	0.0204872	0.104952	PIK3R1,MAPK1
Biocarta	Pos	PC1	M1547	Biocarta hdac pathway	2	25	243	26328	8.66765	0.022135	0.111438	PIK3R1,NFATC2
Biocarta	Pos	PC1	M17941	Biocarta vip pathway	2	26	243	26328	8.33428	0.0238357	0.116001	NFATC2,NFKB1
Biocarta	Pos	PC1	M4047	Biocarta nkt pathway	2	26	243	26328	8.33428	0.0238357	0.116001	CCR7,IL12RB2
Biocarta	Pos	PC1	M9043	Biocarta gh pathway	2	27	243	26328	8.02561	0.0255883	0.120513	PIK3R1,MAPK1
Biocarta	Pos	PC1	M12975	Biocarta vegf pathway	2	27	243	26328	8.02561	0.0255883	0.120513	PIK3R1,HIF1A
Biocarta	Pos	PC1	M648	Biocarta g1 pathway	2	28	243	26328	7.73898	0.0273916	0.126958	ATM,E2F1
Biocarta	Pos	PC1	M13494	Biocarta biopeptides pathway	2	29	243	26328	7.47212	0.0292446	0.131376	FYN,MAPK1
Biocarta	Pos	PC1	M14971	Biocarta death pathway	2	29	243	26328	7.47212	0.0292446	0.131376	BCL2,NFKB1
Biocarta	Pos	PC1	M19358	Biocarta met pathway	2	33	243	26328	6.5664	0.037132	0.164281	PIK3R1,MAPK1
Biocarta	Pos	PC2	M1296	Biocarta il7 pathway	5	16	287	26279	28.6139	5.93922e-07	9.35004e-05	BCL2,FYN,LCK,PTK2B,STAT5B
Biocarta	Pos	PC2	M19118	Biocarta keratinocyte pathway	7	46	287	26279	13.9337	6.40414e-07	9.35004e-05	FASLG,BCL2,TNFRSF1B,TNFRSF1A,PRKCH,ETS1,PRKCQ
Biocarta	Pos	PC2	M10765	Biocarta tcra pathway	4	12	287	26279	30.5215	6.43648e-06	0.000626484	CD247,FYN,LCK,PTPRC
Biocarta	Pos	PC2	M22020	Biocarta prion pathway	3	12	287	26279	22.8911	0.000263628	0.0128299	BCL2,NFE2L2,DNAJB6
Biocarta	Pos	PC2	M13247	Biocarta tcytotoxic pathway	3	12	287	26279	22.8911	0.000263628	0.0128299	CD247,ITGB2,PTPRC
Biocarta	Pos	PC2	M6427	Biocarta thelper pathway	3	12	287	26279	22.8911	0.000263628	0.0128299	CD247,ITGB2,PTPRC
Biocarta	Pos	PC2	M1462	Biocarta ctl pathway	3	13	287	26279	21.1303	0.000339951	0.0132686	FASLG,CD247,ITGB2
Biocarta	Pos	PC2	M13968	Biocarta hivnef pathway	5	56	287	26279	8.1754	0.000363523	0.0132686	FASLG,LMNB1,BCL2,TNFRSF1B,TNFRSF1A
Biocarta	Pos	PC2	M4891	Biocarta pml pathway	3	17	287	26279	16.1584	0.000782536	0.025389	FASLG,TNFRSF1B,TNFRSF1A
Biocarta	Pos	PC2	M6327	Biocarta csk pathway	3	20	287	26279	13.7347	0.0012805	0.0339914	CD247,LCK,PTPRC
Biocarta	Pos	PC2	M1467	Biocarta ctla4 pathway	3	20	287	26279	13.7347	0.0012805	0.0339914	CD247,LCK,ITK
Biocarta	Pos	PC2	M16519	Biocarta tcapoptosis pathway	2	9	287	26279	20.3477	0.00406768	0.0989802	FASLG,CD247
Biocarta	Pos	PC2	M2699	Biocarta sodd pathway	2	10	287	26279	18.3129	0.00504806	0.113387	TNFRSF1B,TNFRSF1A
Biocarta	Pos	PC2	M1473	Biocarta blymphocyte pathway	2	12	287	26279	15.2607	0.00729794	0.148214	ITGB2,PTPRC
Biocarta	Pos	PC2	M8615	Biocarta il2rb pathway	3	37	287	26279	7.42415	0.00761376	0.148214	FASLG,BCL2,STAT5B
Biocarta	Pos	PC2	M8179	Biocarta rab pathway	2	13	287	26279	14.0868	0.00856303	0.156275	RAB7A,RAB27A
Biocarta	Pos	PC2	M16884	Biocarta ach pathway	2	14	287	26279	13.0806	0.00991867	0.160903	FASLG,PTK2B
Biocarta	Pos	PC2	M2587	Biocarta hsp27 pathway	2	14	287	26279	13.0806	0.00991867	0.160903	FASLG,BCL2
Biocarta	Pos	PC2	M5467	Biocarta granulocytes pathway	2	15	287	26279	12.2086	0.0113628	0.165896	ITGB2,SELPLG
Biocarta	Pos	PC2	M10183	Biocarta rela pathway	2	15	287	26279	12.2086	0.0113628	0.165896	TNFRSF1B,TNFRSF1A
Biocarta	Pos	PC2	M19784	Biocarta tcr pathway	3	44	287	26279	6.24303	0.0122728	0.17065	CD247,FYN,LCK
Biocarta	Pos	PC2	M3952	Biocarta lair pathway	2	17	287	26279	10.7723	0.0145079	0.19256	ITGB2,SELPLG
Biocarta	Pos	PC2	M9546	Biocarta tid pathway	2	19	287	26279	9.63836	0.0179824	0.210034	TNFRSF1B,TNFRSF1A
Biocarta	Pos	PC2	M6355	Biocarta ecm pathway	2	19	287	26279	9.63836	0.0179824	0.210034	FYN,DIAPH1
Biocarta	Pos	PC2	M18215	Biocarta tob1 pathway	2	19	287	26279	9.63836	0.0179824	0.210034	TGFBR2,CD247
Biocarta	Pos	PC2	M14339	Biocarta arenrf2 pathway	2	20	287	26279	9.15645	0.0198382	0.222798	NFE2L2,HMOX2
Biocarta	Pos	PC2	M19943	Biocarta ceramide pathway	2	21	287	26279	8.72042	0.0217704	0.227034	BCL2,TNFRSF1A
Biocarta	Pos	PC2	M15285	Biocarta nfkb pathway	2	21	287	26279	8.72042	0.0217704	0.227034	TNFRSF1B,TNFRSF1A
Biocarta	Pos	PC2	M17902	Biocarta caspase pathway	2	22	287	26279	8.32404	0.0237772	0.231432	CASP1,LMNB1
Biocarta	Pos	PC2	M7747	Biocarta il2 pathway	2	22	287	26279	8.32404	0.0237772	0.231432	LCK,STAT5B
Biocarta	Pos	PC2	M13494	Biocarta biopeptides pathway	2	29	287	26279	6.31479	0.0397622	0.36283	FYN,PTK2B
Biocarta	Pos	PC2	M3618	Biocarta tnfr1 pathway	2	29	287	26279	6.31479	0.0397622	0.36283	LMNB1,TNFRSF1A
Biocarta	Pos	PC2	M9503	Biocarta fas pathway	2	30	287	26279	6.1043	0.0423018	0.374307	FASLG,LMNB1
Biocarta	Pos	PC3	M18215	Biocarta tob1 pathway	6	19	237	26329	35.0819	1.22833e-08	2.54271e-06	CD3G,CD3E,TGFBR2,CD28,CD3D,SMAD3
Biocarta	Pos	PC3	M1467	Biocarta ctla4 pathway	6	20	237	26329	33.3278	1.74158e-08	2.54271e-06	CD3G,CD3E,ICOS,CTLA4,CD28,CD3D
Biocarta	Pos	PC3	M13247	Biocarta tcytotoxic pathway	5	12	237	26329	46.2887	4.26207e-08	3.11131e-06	CD3G,CD3E,CD28,CD3D,CD2
Biocarta	Pos	PC3	M6427	Biocarta thelper pathway	5	12	237	26329	46.2887	4.26207e-08	3.11131e-06	CD3G,CD3E,CD28,CD3D,CD2
Biocarta	Pos	PC3	M19784	Biocarta tcr pathway	7	44	237	26329	17.6739	1.26477e-07	7.38623e-06	CD3G,CD3E,PLCG1,CD3D,NFATC1,NFKB1,LAT
Biocarta	Pos	PC3	M16519	Biocarta tcapoptosis pathway	4	9	237	26329	49.3746	7.78492e-07	3.28142e-05	CD3G,CD3E,CD28,CD3D
Biocarta	Pos	PC3	M16966	Biocarta stathmin pathway	5	20	237	26329	27.7732	7.86642e-07	3.28142e-05	CD3G,CD3E,CD3D,CD2,CAMK4
Biocarta	Pos	PC3	M19422	Biocarta il17 pathway	4	15	237	26329	29.6248	8.08234e-06	0.000262227	CD3G,CD3E,CD3D,CD2
Biocarta	Pos	PC3	M6231	Biocarta no2il12 pathway	4	15	237	26329	29.6248	8.08234e-06	0.000262227	CD3G,CD3E,CD3D,CD2
Biocarta	Pos	PC3	M2821	Biocarta nthi pathway	4	23	237	26329	19.3205	4.95452e-05	0.00144672	TGFBR2,NR3C1,NFKB1,SMAD3
Biocarta	Pos	PC3	M10765	Biocarta tcra pathway	3	12	237	26329	27.7732	0.00014921	0.00396084	CD3G,CD3E,CD3D
Biocarta	Pos	PC3	M1462	Biocarta ctl pathway	3	13	237	26329	25.6368	0.000192685	0.00468866	CD3G,CD3E,CD3D
Biocarta	Pos	PC3	M4319	Biocarta il12 pathway	3	19	237	26329	17.541	0.000627289	0.0140899	CD3G,CD3E,CD3D
Biocarta	Pos	PC3	M6327	Biocarta csk pathway	3	20	237	26329	16.6639	0.0007331	0.0152904	CD3G,CD3E,CD3D
Biocarta	Pos	PC3	M17941	Biocarta vip pathway	3	26	237	26329	12.8184	0.00160675	0.031278	PLCG1,NFATC1,NFKB1
Biocarta	Pos	PC3	M22017	Biocarta vobesity pathway	2	8	237	26329	27.7732	0.00217993	0.0397836	NR3C1,HSD11B1
Biocarta	Pos	PC3	M10066	Biocarta gcr pathway	2	17	237	26329	13.0697	0.0100384	0.16556	NR3C1,NFKB1
Biocarta	Pos	PC3	M3430	Biocarta calcineurin pathway	2	18	237	26329	12.3436	0.0112267	0.16556	PLCG1,NFATC1
Biocarta	Pos	PC3	M7552	Biocarta cardiacegf pathway	2	18	237	26329	12.3436	0.0112267	0.16556	PLCG1,NFKB1
Biocarta	Pos	PC3	M882	Biocarta cxcr4 pathway	2	19	237	26329	11.694	0.0124737	0.16556	PLCG1,NFKB1
Biocarta	Pos	PC3	M12836	Biocarta epo pathway	2	19	237	26329	11.694	0.0124737	0.16556	PTPN6,PLCG1
Biocarta	Pos	PC3	M18933	Biocarta tgfb pathway	2	19	237	26329	11.694	0.0124737	0.16556	TGFBR2,SMAD3
Biocarta	Pos	PC3	M11106	Biocarta gsk3 pathway	2	20	237	26329	11.1093	0.0137782	0.167635	NFKB1,LEF1
Biocarta	Pos	PC3	M16355	Biocarta nkcells pathway	2	20	237	26329	11.1093	0.0137782	0.167635	PTPN6,LAT
Biocarta	Pos	PC3	M5489	Biocarta il6 pathway	2	21	237	26329	10.5803	0.0151391	0.170024	IL6R,IL6ST
Biocarta	Pos	PC3	M6705	Biocarta th1th2 pathway	2	21	237	26329	10.5803	0.0151391	0.170024	CD28,IL4R
Biocarta	Pos	PC3	M8809	Biocarta ptdins pathway	2	23	237	26329	9.66025	0.0180256	0.187982	PLCG1,EEA1
Biocarta	Pos	PC3	M18719	Biocarta her2 pathway	2	23	237	26329	9.66025	0.0180256	0.187982	IL6R,IL6ST
Biocarta	Pos	PC3	M4047	Biocarta nkt pathway	2	26	237	26329	8.5456	0.0227511	0.22908	CD28,IL4R
Biocarta	Pos	PC3	M9043	Biocarta gh pathway	2	27	237	26329	8.2291	0.0244275	0.237761	PTPN6,PLCG1
Biocarta	Pos	PC3	M9664	Biocarta gpcr pathway	2	30	237	26329	7.40619	0.0297464	0.280192	PLCG1,NFATC1
Biocarta	Pos	PC3	M9494	Biocarta bcr pathway	2	33	237	26329	6.7329	0.0354787	0.323743	PLCG1,NFATC1
Biocarta	Pos	PC3	M10287	Biocarta fmlp pathway	2	34	237	26329	6.53487	0.0374769	0.331614	NFATC1,NFKB1
Biocarta	Pos	PC3	M8615	Biocarta il2rb pathway	2	37	237	26329	6.00502	0.0437208	0.368819	PTPN6,CBL
Biocarta	Pos	PC3	M22059	Biocarta ion pathway	1	5	237	26329	22.2186	0.0442077	0.368819	PLCG1
Biocarta	Pos	PC3	M1908	Biocarta fcer1 pathway	2	39	237	26329	5.69707	0.0480822	0.39	PLCG1,NFATC1
Biocarta	Neg	PC1	M22003	Biocarta eicosanoid pathway	2	22	278	26276	8.59254	0.0224127	1	CYSLTR2,ALOX5AP
Biocarta	Neg	PC1	M1547	Biocarta hdac pathway	2	25	278	26276	7.56144	0.0285111	1	AVP,MAP2K6
Biocarta	Neg	PC2	M8809	Biocarta ptdins pathway	3	23	273	26278	12.5552	0.00168386	0.491688	VAV2,PRKCE,ARHGEF2
Biocarta	Neg	PC2	M9494	Biocarta bcr pathway	3	33	273	26278	8.75058	0.0048059	0.541142	SYK,NFATC1,PPP3CC
Biocarta	Neg	PC2	M18053	Biocarta leptin pathway	2	11	273	26278	17.5012	0.00555968	0.541142	CPT1A,PRKAG2
Biocarta	Neg	PC2	M1908	Biocarta fcer1 pathway	3	39	273	26278	7.40434	0.00769076	0.561426	SYK,NFATC1,PPP3CC
Biocarta	Neg	PC2	M3430	Biocarta calcineurin pathway	2	18	273	26278	10.6952	0.014744	0.682732	NFATC1,PPP3CC
Biocarta	Neg	PC2	M5290	Biocarta mef2d pathway	2	18	273	26278	10.6952	0.014744	0.682732	NFATC1,PPP3CC
Biocarta	Neg	PC2	M10547	Biocarta mal pathway	2	19	273	26278	10.1323	0.0163669	0.682732	MAP4K2,LIMK1
Biocarta	Neg	PC2	M1547	Biocarta hdac pathway	2	25	273	26278	7.70051	0.0275684	0.962445	NFATC1,PPP3CC
Biocarta	Neg	PC2	M17941	Biocarta vip pathway	2	26	273	26278	7.40434	0.0296644	0.962445	NFATC1,PPP3CC
Biocarta	Neg	PC2	M9664	Biocarta gpcr pathway	2	30	273	26278	6.41709	0.0386471	1	NFATC1,PPP3CC
Biocarta	Neg	PC2	M10287	Biocarta fmlp pathway	2	34	273	26278	5.66214	0.0485186	1	NFATC1,PPP3CC
Biocarta	Neg	PC3	M1462	Biocarta ctl pathway	4	13	267	26297	30.3048	6.91287e-06	0.00201856	GZMB,FASLG,PRF1,CD247
Biocarta	Neg	PC3	M4319	Biocarta il12 pathway	4	19	267	26297	20.7349	3.5717e-05	0.00521468	IFNG,STAT4,CD247,IL18R1
Biocarta	Neg	PC3	M6231	Biocarta no2il12 pathway	3	15	267	26297	19.6981	0.000430222	0.0418749	IFNG,STAT4,CD247
Biocarta	Neg	PC3	M10145	Biocarta pten pathway	3	18	267	26297	16.4151	0.000754371	0.0486555	FASLG,FOXO3,MAPK1
Biocarta	Neg	PC3	M18215	Biocarta tob1 pathway	3	19	267	26297	15.5512	0.000889119	0.0486555	IFNG,CD247,TGFBR3
Biocarta	Neg	PC3	M19784	Biocarta tcr pathway	4	44	267	26297	8.95369	0.00102505	0.0486555	CD247,FYN,PPP3CA,PRKCB
Biocarta	Neg	PC3	M19118	Biocarta keratinocyte pathway	4	46	267	26297	8.5644	0.00121281	0.0486555	FASLG,MAPK1,PRKCB,PRKCQ
Biocarta	Neg	PC3	M9070	Biocarta creb pathway	3	22	267	26297	13.4305	0.00138162	0.0486555	MAPK1,PRKCB,RPS6KA5
Biocarta	Neg	PC3	M22085	Biocarta ifng pathway	2	6	267	26297	32.8302	0.00149966	0.0486555	IFNG,JAK1
Biocarta	Neg	PC3	M22039	Biocarta tsp1 pathway	2	7	267	26297	28.1402	0.00208546	0.0608954	THBS1,FYN
Biocarta	Neg	PC3	M22063	Biocarta stat3 pathway	2	8	267	26297	24.6227	0.00276201	0.0733187	JAK1,MAPK1
Biocarta	Neg	PC3	M13494	Biocarta biopeptides pathway	3	29	267	26297	10.1887	0.00311103	0.0757018	FYN,MAPK1,PRKCB
Biocarta	Neg	PC3	M16519	Biocarta tcapoptosis pathway	2	9	267	26297	21.8868	0.00352741	0.0792311	FASLG,CD247
Biocarta	Neg	PC3	M3075	Biocarta set pathway	2	10	267	26297	19.6981	0.00437981	0.0913503	GZMB,PRF1
Biocarta	Neg	PC3	M3342	Biocarta integrin pathway	3	34	267	26297	8.69035	0.00490839	0.0955501	RAPGEF1,FYN,MAPK1
Biocarta	Neg	PC3	M18837	Biocarta egfr smrte pathway	2	11	267	26297	17.9074	0.00531737	0.097042	NCOR2,ZBTB16
Biocarta	Neg	PC3	M8615	Biocarta il2rb pathway	3	37	267	26297	7.98573	0.00623269	0.0974095	FASLG,JAK1,MAPK1
Biocarta	Neg	PC3	M15513	Biocarta d4gdi pathway	2	12	267	26297	16.4151	0.00633829	0.0974095	GZMB,PRF1
Biocarta	Neg	PC3	M10765	Biocarta tcra pathway	2	12	267	26297	16.4151	0.00633829	0.0974095	CD247,FYN
Biocarta	Neg	PC3	M1908	Biocarta fcer1 pathway	3	39	267	26297	7.5762	0.0072227	0.105451	MAPK1,PPP3CA,PRKCB
Biocarta	Neg	PC3	M16173	Biocarta ps1 pathway	2	14	267	26297	14.0701	0.00862313	0.114452	RBPJ,AXIN1
Biocarta	Neg	PC3	M16884	Biocarta ach pathway	2	14	267	26297	14.0701	0.00862313	0.114452	FASLG,FOXO3
Biocarta	Neg	PC3	M8731	Biocarta sppa pathway	2	16	267	26297	12.3113	0.0112204	0.131055	MAPK1,PRKCB
Biocarta	Neg	PC3	M4388	Biocarta cdmac pathway	2	16	267	26297	12.3113	0.0112204	0.131055	MAPK1,PRKCB
Biocarta	Neg	PC3	M1296	Biocarta il7 pathway	2	16	267	26297	12.3113	0.0112204	0.131055	JAK1,FYN
Biocarta	Neg	PC3	M2482	Biocarta arap pathway	2	17	267	26297	11.5871	0.0126321	0.136613	ARF1,ARAP1
Biocarta	Neg	PC3	M111	Biocarta barrestin src pathway	2	17	267	26297	11.5871	0.0126321	0.136613	FGR,MAPK1
Biocarta	Neg	PC3	M3430	Biocarta calcineurin pathway	2	18	267	26297	10.9434	0.0141168	0.140371	PPP3CA,PRKCB
Biocarta	Neg	PC3	M5290	Biocarta mef2d pathway	2	18	267	26297	10.9434	0.0141168	0.140371	PPP3CA,PRKCB
Biocarta	Neg	PC3	M9152	Biocarta ccr3 pathway	2	19	267	26297	10.3674	0.015673	0.140371	MAPK1,PRKCB
Biocarta	Neg	PC3	M882	Biocarta cxcr4 pathway	2	19	267	26297	10.3674	0.015673	0.140371	MAPK1,PRKCB
Biocarta	Neg	PC3	M6355	Biocarta ecm pathway	2	19	267	26297	10.3674	0.015673	0.140371	FYN,MAPK1
Biocarta	Neg	PC3	M2404	Biocarta ppara pathway	3	52	267	26297	5.68215	0.0158638	0.140371	NCOR2,MAPK1,PRKCB
Biocarta	Neg	PC3	M14339	Biocarta arenrf2 pathway	2	20	267	26297	9.84906	0.017299	0.144323	MAPK1,PRKCB
Biocarta	Neg	PC3	M1467	Biocarta ctla4 pathway	2	20	267	26297	9.84906	0.017299	0.144323	CD247,ITK
Biocarta	Neg	PC3	M11650	Biocarta nos1 pathway	2	21	267	26297	9.38006	0.0189934	0.149894	PPP3CA,PRKCB
Biocarta	Neg	PC3	M6705	Biocarta th1th2 pathway	2	21	267	26297	9.38006	0.0189934	0.149894	IFNG,IL18R1
Biocarta	Neg	PC3	M15258	Biocarta akt pathway	2	22	267	26297	8.95369	0.0207546	0.151509	FASLG,FOXO3
Biocarta	Neg	PC3	M17902	Biocarta caspase pathway	2	22	267	26297	8.95369	0.0207546	0.151509	GZMB,PRF1
Biocarta	Neg	PC3	M10579	Biocarta edg1 pathway	2	22	267	26297	8.95369	0.0207546	0.151509	MAPK1,PRKCB
Biocarta	Neg	PC3	M4791	Biocarta eif4 pathway	2	24	267	26297	8.20755	0.0244713	0.174283	MAPK1,PRKCB
Biocarta	Neg	PC3	M4047	Biocarta nkt pathway	2	26	267	26297	7.5762	0.0284371	0.185601	IFNG,IL18R1
Biocarta	Neg	PC3	M14899	Biocarta at1r pathway	2	27	267	26297	7.2956	0.0305098	0.185601	MAPK1,PRKCB
Biocarta	Neg	PC3	M1909	Biocarta egf pathway	2	27	267	26297	7.2956	0.0305098	0.185601	JAK1,PRKCB
Biocarta	Neg	PC3	M287	Biocarta erk pathway	2	27	267	26297	7.2956	0.0305098	0.185601	MAPK1,RPS6KA5
Biocarta	Neg	PC3	M9043	Biocarta gh pathway	2	27	267	26297	7.2956	0.0305098	0.185601	MAPK1,PRKCB
Biocarta	Neg	PC3	M7739	Biocarta pyk2 pathway	2	27	267	26297	7.2956	0.0305098	0.185601	MAPK1,PRKCB
Biocarta	Neg	PC3	M12975	Biocarta vegf pathway	2	27	267	26297	7.2956	0.0305098	0.185601	ELAVL1,PRKCB
Biocarta	Neg	PC3	M2529	Biocarta pdgf pathway	2	28	267	26297	7.03505	0.0326406	0.194511	JAK1,PRKCB
Biocarta	Neg	PC3	M9664	Biocarta gpcr pathway	2	30	267	26297	6.56604	0.0370706	0.216492	PPP3CA,PRKCB
Biocarta	Neg	PC3	M9494	Biocarta bcr pathway	2	33	267	26297	5.96913	0.0441168	0.247733	PPP3CA,PRKCB
Biocarta	Neg	PC3	M19358	Biocarta met pathway	2	33	267	26297	5.96913	0.0441168	0.247733	RAPGEF1,MAPK1
Biocarta	Neg	PC3	M10287	Biocarta fmlp pathway	2	34	267	26297	5.79357	0.0465673	0.25656	MAPK1,PPP3CA
Biocarta	Neg	PC3	M22059	Biocarta ion pathway	1	5	267	26297	19.6981	0.0497495	0.264125	PRKCB
Biocarta	Neg	PC3	M22080	Biocarta plcd pathway	1	5	267	26297	19.6981	0.0497495	0.264125	PRKCB
Reactome	Pos	PC1	M15381	Reactome tcr signaling	11	117	243	25882	10.0138	1.44119e-08	2.31167e-05	PRKCQ,PTPRC,NFKB1,ITK,ZAP70,UBE2D2,PIK3R1,LCK,EVL,CD247,LAT
Reactome	Pos	PC1	M27175	Reactome fc epsilon receptor fceri signaling	11	131	243	25882	8.94361	4.69637e-08	3.76649e-05	FYN,PRKCQ,TXK,MAPK1,NFATC2,NFKB1,ITK,UBE2D2,PIK3R1,RASGRP1,LAT
Reactome	Pos	PC1	M1077	Reactome platelet activation signaling and aggregation	14	259	243	25882	5.75731	1.82166e-07	9.2037e-05	FYN,PRKCH,PRKCQ,WDR1,ACTN1,DGKD,MAPK1,GNA13,PIK3R5,PIK3R1,YWHAZ,RASGRP1,LCK,LAT
Reactome	Pos	PC1	M1060	Reactome cytokine signaling in immune system	23	701	243	25882	3.49463	2.29519e-07	9.2037e-05	FYN,RPS6KA2,PTPN18,IL12RB2,MAPK1,HIF1A,IL21R,NFKB1,OPRM1,PRLR,FASLG,IRF1,UBE2D2,IL19,PIK3R1,SLA,YWHAZ,B2M,BCL2,ISG20,LCK,IFITM1,LTA
Reactome	Pos	PC1	M8395	Reactome hemostasis	21	613	243	25882	3.6488	3.92422e-07	0.000125889	FYN,PRKCH,PRKCQ,WDR1,ACTN1,DGKD,PPP2R5C,MAPK1,CD48,GNA13,IRF1,PIK3R5,PIK3R1,ATP2B2,PDE9A,KIF26B,YWHAZ,RASGRP1,ZFPM1,LCK,LAT
Reactome	Pos	PC1	M16523	Reactome generation of second messenger molecules	6	32	243	25882	19.9707	4.75622e-07	0.00012715	ITK,ZAP70,LCK,EVL,CD247,LAT
Reactome	Pos	PC1	M1058	Reactome adaptive immune system	22	755	243	25882	3.10361	2.98655e-06	0.000684347	FYN,PRKCQ,CLEC2D,PPP2R5C,PTPRC,NFATC2,NFKB1,ITK,ZAP70,UBE2D2,PIK3R1,ERAP2,YWHAZ,B2M,TAP1,RASGRP1,LCK,IFITM1,PDCD1,EVL,CD247,LAT
Reactome	Pos	PC1	M27171	Reactome dap12 signaling	5	29	243	25882	18.3638	6.91607e-06	0.00138667	FYN,PIK3R1,B2M,LCK,LAT
Reactome	Pos	PC1	M773	Reactome gpvi mediated activation cascade	5	35	243	25882	15.2158	1.80573e-05	0.00321821	FYN,PIK3R5,PIK3R1,LCK,LAT
Reactome	Pos	PC1	M874	Reactome signaling by interleukins	15	449	243	25882	3.55825	2.51481e-05	0.00403376	FYN,RPS6KA2,PTPN18,IL12RB2,MAPK1,HIF1A,IL21R,NFKB1,OPRM1,FASLG,IL19,PIK3R1,YWHAZ,BCL2,LCK
Reactome	Pos	PC1	M27151	Reactome dap12 interactions	5	40	243	25882	13.3138	3.52281e-05	0.00488352	FYN,PIK3R1,B2M,LCK,LAT
Reactome	Pos	PC1	M17386	Reactome costimulation by the cd28 family	6	66	243	25882	9.68275	3.6535e-05	0.00488352	FYN,PPP2R5C,PIK3R1,LCK,PDCD1,CD247
Reactome	Pos	PC1	M41838	Reactome signaling by rho gtpases miro gtpases and rhobtb3	19	707	243	25882	2.86237	4.34951e-05	0.00506544	VRK2,NCK2,ACTN1,PPP2R5C,MAPK1,MYH9,ZAP70,GNA13,KIDINS220,PIK3R1,ADD3,CDC42SE2,ARHGEF3,YWHAZ,GARRE1,LCK,SPATA13,ANKFY1,EVL
Reactome	Pos	PC1	M26997	Reactome nef and signal transduction	3	8	243	25882	39.9414	4.4212e-05	0.00506544	FYN,LCK,CD247
Reactome	Pos	PC1	M1036	Reactome innate immune system	24	1045	243	25882	2.44617	5.37169e-05	0.00574413	FYN,RNF216,ATP6V0A1,PRKCQ,RPS6KA2,TXK,PTPRC,MAPK1,MYH9,NFATC2,NFKB1,ITK,QPCT,UBE2D2,PIK3R1,B2M,GLB1,BCL2,RASGRP1,TBC1D10C,CPN2,LCK,CD247,LAT
Reactome	Pos	PC1	M913	Reactome nephrin family interactions	4	23	243	25882	18.5235	5.83324e-05	0.00584782	FYN,NCK2,ACTN1,PIK3R1
Reactome	Pos	PC1	M27078	Reactome rho gtpase cycle	14	443	243	25882	3.36601	8.47419e-05	0.00799565	VRK2,NCK2,ACTN1,ZAP70,GNA13,KIDINS220,PIK3R1,ADD3,CDC42SE2,ARHGEF3,GARRE1,LCK,SPATA13,ANKFY1
Reactome	Pos	PC1	M12123	Reactome effects of pip2 hydrolysis	4	27	243	25882	15.7793	0.000112251	0.00976192	PRKCH,PRKCQ,DGKD,RASGRP1
Reactome	Pos	PC1	M41811	Reactome rhod gtpase cycle	5	51	243	25882	10.4422	0.000115634	0.00976192	VRK2,ACTN1,PIK3R1,ADD3,ANKFY1
Reactome	Pos	PC1	M11362	Reactome the role of nef in hiv 1 replication and disease pathogenesis	4	28	243	25882	15.2158	0.000129998	0.0104259	FYN,B2M,LCK,CD247
Reactome	Pos	PC1	M41728	Reactome maturation of sars cov 2 spike protein	4	29	243	25882	14.6911	0.000149692	0.0114336	MGAT4A,ST6GAL1,DAD1,MAN1B1
Reactome	Pos	PC1	M27436	Reactome programmed cell death	9	208	243	25882	4.60862	0.000163359	0.0115838	PRKCQ,MAPK1,E2F1,FASLG,IRF1,YWHAZ,BCL2,SATB1,DIABLO
Reactome	Pos	PC1	M7455	Reactome intrinsic pathway for apoptosis	5	55	243	25882	9.68275	0.000166102	0.0115838	MAPK1,E2F1,YWHAZ,BCL2,DIABLO
Reactome	Pos	PC1	M27206	Reactome fceri mediated ca 2 mobilization	4	31	243	25882	13.7433	0.000195411	0.0127916	TXK,NFATC2,ITK,LAT
Reactome	Pos	PC1	M27507	Reactome vesicle mediated transport	17	665	243	25882	2.72282	0.00019937	0.0127916	AMPH,EXOC1,MYH9,RIC1,EXOC2,MAN1C1,EPS15L1,SNX9,NBAS,LDLRAP1,TRAPPC10,KIF26B,YWHAZ,RAB8B,SCARA5,TBC1D10C,GAK
Reactome	Pos	PC1	M15303	Reactome apoptosis	8	179	243	25882	4.76024	0.000302748	0.0182503	PRKCQ,MAPK1,E2F1,FASLG,YWHAZ,BCL2,SATB1,DIABLO
Reactome	Pos	PC1	M11480	Reactome membrane trafficking	16	626	243	25882	2.72231	0.000307205	0.0182503	AMPH,EXOC1,MYH9,RIC1,EXOC2,MAN1C1,EPS15L1,SNX9,NBAS,LDLRAP1,TRAPPC10,KIF26B,YWHAZ,RAB8B,TBC1D10C,GAK
Reactome	Pos	PC1	M29803	Reactome flt3 signaling	4	38	243	25882	11.2116	0.000435426	0.0249437	FYN,PIK3R1,SLA,LCK
Reactome	Pos	PC1	M713	Reactome negative regulation of the pi3k akt network	6	113	243	25882	5.65541	0.000704547	0.0389688	FYN,PPP2R5C,MAPK1,PIK3R1,PIP4K2A,LCK
Reactome	Pos	PC1	M41730	Reactome translation of sars cov 2 structural proteins	4	44	243	25882	9.68275	0.000766289	0.0409709	MGAT4A,ST6GAL1,DAD1,MAN1B1
Reactome	Pos	PC1	M39002	Reactome signaling by kit in disease	3	20	243	25882	15.9765	0.000828039	0.0428444	FYN,PIK3R1,LCK
Reactome	Pos	PC1	M5876	Reactome ctla4 inhibitory signaling	3	21	243	25882	15.2158	0.000959377	0.0466315	FYN,PPP2R5C,LCK
Reactome	Pos	PC1	M18810	Reactome pd 1 signaling	3	21	243	25882	15.2158	0.000959377	0.0466315	LCK,PDCD1,CD247
Reactome	Pos	PC1	M13897	Reactome cd28 dependent pi3k akt signaling	3	22	243	25882	14.5241	0.00110319	0.0520447	FYN,PIK3R1,LCK
Reactome	Pos	PC1	M41736	Reactome flt3 signaling through src family kinases	2	6	243	25882	35.5034	0.00128448	0.0585501	FYN,LCK
Reactome	Pos	PC1	M27107	Reactome fcgamma receptor fcgr dependent phagocytosis	5	86	243	25882	6.19246	0.00131409	0.0585501	FYN,MAPK1,MYH9,PIK3R1,CD247
Reactome	Pos	PC1	M662	Reactome synthesis of pips at the plasma membrane	4	53	243	25882	8.03851	0.00154754	0.067088	INPP4A,PIK3R5,PIK3R1,PIP4K2A
Reactome	Pos	PC1	M1062	Reactome antigen presentation folding assembly and peptide loading of class i mhc	3	25	243	25882	12.7812	0.00161378	0.0681187	ERAP2,B2M,TAP1
Reactome	Pos	PC1	M3574	Reactome signaling by ntrks	6	134	243	25882	4.76912	0.00170117	0.0699166	FYN,RPS6KA2,MAPK1,KIDINS220,MAP2K5,PIK3R1
Reactome	Pos	PC1	M41823	Reactome sensory processing of sound by outer hair cells of the cochlea	4	55	243	25882	7.7462	0.00177628	0.0699166	MYH9,CDH23,RIPOR2,ATP2B2
Reactome	Pos	PC1	M27369	Reactome rsk activation	2	7	243	25882	30.4315	0.00178714	0.0699166	RPS6KA2,MAPK1
Reactome	Pos	PC1	M27188	Reactome cellular senescence	7	190	243	25882	3.92406	0.00218973	0.0836266	RPS6KA2,MAPK1,E2F1,NFKB1,ETS1,ATM,TNIK
Reactome	Pos	PC1	M29843	Reactome parasite infection	4	59	243	25882	7.22104	0.00230215	0.0844104	FYN,MAPK1,MYH9,CD247
Reactome	Pos	PC1	M27359	Reactome binding of tcf lef ctnnb1 to target gene promoters	2	8	243	25882	26.6276	0.00236812	0.0844104	RUNX3,TCF7
Reactome	Pos	PC1	M27821	Reactome runx3 regulates wnt signaling	2	8	243	25882	26.6276	0.00236812	0.0844104	RUNX3,TCF7
Reactome	Pos	PC1	M27253	Reactome cellular response to heat stress	5	101	243	25882	5.27279	0.00266855	0.0930513	MAPK1,GML,RPA1,RPTOR,ATM
Reactome	Pos	PC1	M17814	Reactome activation of bh3 only proteins	3	30	243	25882	10.651	0.00275201	0.0939197	E2F1,YWHAZ,BCL2
Reactome	Pos	PC1	M27870	Reactome signaling by receptor tyrosine kinases	12	504	243	25882	2.53596	0.00306535	0.102434	RANBP9,FYN,ATP6V0A1,NCK2,RPS6KA2,PTPN18,MAPK1,EPS15L1,KIDINS220,MAP2K5,PIK3R1,LCK
Reactome	Pos	PC1	M27609	Reactome interleukin 4 and interleukin 13 signaling	5	108	243	25882	4.93103	0.00356245	0.111657	HIF1A,OPRM1,FASLG,PIK3R1,BCL2
Reactome	Pos	PC1	M11725	Reactome cd28 co stimulation	3	33	243	25882	9.68275	0.00362259	0.111657	FYN,PIK3R1,LCK
Reactome	Pos	PC1	M27565	Reactome mapk family signaling cascades	9	323	243	25882	2.96778	0.00362564	0.111657	RANBP9,FYN,PRKCQ,PPP2R5C,MAPK1,CCND3,PIK3R1,RASGRP1,LAT
Reactome	Pos	PC1	M41727	Reactome sars cov 2 infection	4	67	243	25882	6.35882	0.00365748	0.111657	MGAT4A,ST6GAL1,DAD1,MAN1B1
Reactome	Pos	PC1	M27783	Reactome runx1 and foxp3 control the development of regulatory t lymphocytes tregs	2	10	243	25882	21.3021	0.00375903	0.111657	NFATC2,RUNX1
Reactome	Pos	PC1	M27824	Reactome runx3 regulates p14 arf	2	10	243	25882	21.3021	0.00375903	0.111657	RUNX3,RUNX1
Reactome	Pos	PC1	M608	Reactome signaling by the b cell receptor bcr	5	110	243	25882	4.84138	0.00385306	0.112369	FYN,NFATC2,NFKB1,PIK3R1,RASGRP1
Reactome	Pos	PC1	M27190	Reactome oncogene induced senescence	3	35	243	25882	9.12945	0.00428622	0.12277	MAPK1,E2F1,ETS1
Reactome	Pos	PC1	M18437	Reactome g alpha q signalling events	7	216	243	25882	3.45172	0.00444381	0.124134	PRKCH,PRKCQ,RPS6KA2,DGKD,MAPK1,PIK3R1,RASGRP1
Reactome	Pos	PC1	M26954	Reactome translocation of slc2a4 glut4 to the plasma membrane	4	71	243	25882	6.00058	0.00450347	0.124134	EXOC1,MYH9,EXOC2,YWHAZ
Reactome	Pos	PC1	M41721	Reactome formation of apoptosome	2	11	243	25882	19.3655	0.00456602	0.124134	MAPK1,DIABLO
Reactome	Pos	PC1	M27108	Reactome fcgr activation	2	12	243	25882	17.7517	0.00544544	0.136476	FYN,CD247
Reactome	Pos	PC1	M11773	Reactome pecam1 interactions	2	12	243	25882	17.7517	0.00544544	0.136476	FYN,LCK
Reactome	Pos	PC1	M13618	Reactome cd28 dependent vav1 pathway	2	12	243	25882	17.7517	0.00544544	0.136476	FYN,LCK
Reactome	Pos	PC1	M27352	Reactome gp1b ix v activation signalling	2	12	243	25882	17.7517	0.00544544	0.136476	PIK3R1,YWHAZ
Reactome	Pos	PC1	M27905	Reactome erythropoietin activates phosphoinositide 3 kinase pi3k	2	12	243	25882	17.7517	0.00544544	0.136476	PIK3R5,PIK3R1
Reactome	Pos	PC1	M41822	Reactome sensory processing of sound	4	77	243	25882	5.533	0.00600491	0.148183	MYH9,CDH23,RIPOR2,ATP2B2
Reactome	Pos	PC1	M746	Reactome signaling by gpcr	14	696	243	25882	2.14245	0.0063714	0.153119	PRKCH,PRKCQ,RPS6KA2,DGKD,MAPK1,OPRM1,GNA13,CCR7,PIK3R5,PIK3R1,ARHGEF3,CXCR6,RASGRP1,PDE7A
Reactome	Pos	PC1	M26907	Reactome cytochrome c mediated apoptotic response	2	13	243	25882	16.3862	0.00639587	0.153119	MAPK1,DIABLO
Reactome	Pos	PC1	M1012	Reactome interleukin 2 family signaling	3	41	243	25882	7.79344	0.00669912	0.15802	IL21R,PIK3R1,LCK
Reactome	Pos	PC1	M41821	Reactome rhof gtpase cycle	3	42	243	25882	7.60788	0.00716511	0.16433	ACTN1,PIK3R1,ADD3
Reactome	Pos	PC1	M27207	Reactome fceri mediated nf kb activation	4	81	243	25882	5.25977	0.00717151	0.16433	PRKCQ,NFKB1,UBE2D2,RASGRP1
Reactome	Pos	PC1	M622	Reactome prolonged erk activation events	2	14	243	25882	15.2158	0.00741591	0.166746	MAPK1,KIDINS220
Reactome	Pos	PC1	M27250	Reactome regulation of hsf1 mediated heat shock response	4	82	243	25882	5.19562	0.00748486	0.166746	MAPK1,GML,RPA1,ATM
Reactome	Pos	PC1	M508	Reactome signaling by scf kit	3	43	243	25882	7.43095	0.00764987	0.168087	FYN,PIK3R1,LCK
Reactome	Pos	PC1	M676	Reactome pi metabolism	4	84	243	25882	5.07192	0.00813832	0.176404	INPP4A,PIK3R5,PIK3R1,PIP4K2A
Reactome	Pos	PC1	M26902	Reactome activation of bad and translocation to mitochondria	2	15	243	25882	14.2014	0.00850418	0.179483	YWHAZ,BCL2
Reactome	Pos	PC1	M966	Reactome n glycan antennae elongation	2	15	243	25882	14.2014	0.00850418	0.179483	MGAT4A,ST6GAL1
Reactome	Pos	PC1	M27867	Reactome intracellular signaling by second messengers	8	307	243	25882	2.77551	0.00876955	0.18268	FYN,PPP2R5C,MAPK1,ATN1,RPTOR,PIK3R1,PIP4K2A,LCK
Reactome	Pos	PC1	M914	Reactome interleukin 3 interleukin 5 and gm csf signaling	3	46	243	25882	6.94632	0.00921829	0.189566	FYN,PIK3R1,YWHAZ
Reactome	Pos	PC1	M537	Reactome regulation of kit signaling	2	16	243	25882	13.3138	0.00965933	0.191278	FYN,LCK
Reactome	Pos	PC1	M27203	Reactome role of lat2 ntal lab on calcium mobilization	2	16	243	25882	13.3138	0.00965933	0.191278	FYN,PIK3R1
Reactome	Pos	PC1	M923	Reactome rap1 signalling	2	16	243	25882	13.3138	0.00965933	0.191278	YWHAZ,RASGRP1
Reactome	Pos	PC1	M27788	Reactome regulation of runx1 expression and activity	2	17	243	25882	12.5306	0.01088	0.210259	CCND3,RUNX1
Reactome	Pos	PC1	M38998	Reactome aberrant regulation of mitotic g1 s transition in cancer due to rb1 defects	2	17	243	25882	12.5306	0.01088	0.210259	E2F1,CCND3
Reactome	Pos	PC1	M553	Reactome signaling by erbb2	3	50	243	25882	6.39062	0.0115812	0.221147	FYN,PTPN18,PIK3R1
Reactome	Pos	PC1	M27753	Reactome clathrin mediated endocytosis	5	144	243	25882	3.69827	0.0117363	0.221471	AMPH,EPS15L1,SNX9,LDLRAP1,GAK
Reactome	Pos	PC1	M657	Reactome gastrin creb signalling pathway via pkc and mapk	2	18	243	25882	11.8345	0.0121649	0.225322	RPS6KA2,MAPK1
Reactome	Pos	PC1	M27480	Reactome cargo trafficking to the periciliary membrane	3	51	243	25882	6.26531	0.0122213	0.225322	EXOC1,EXOC2,LZTFL1
Reactome	Pos	PC1	M39009	Reactome sars cov infections	5	146	243	25882	3.64761	0.0124001	0.22602	MGAT4A,ST6GAL1,DAD1,MAN1B1,PDCD1
Reactome	Pos	PC1	M29565	Reactome myd88 independent tlr4 cascade	4	97	243	25882	4.39218	0.0133044	0.238179	RPS6KA2,MAPK1,NFKB1,UBE2D2
Reactome	Pos	PC1	M27310	Reactome ephrin signaling	2	19	243	25882	11.2116	0.0135127	0.238179	FYN,NCK2
Reactome	Pos	PC1	M27846	Reactome ldl clearance	2	19	243	25882	11.2116	0.0135127	0.238179	SOAT1,LDLRAP1
Reactome	Pos	PC1	M26909	Reactome apoptotic factor mediated response	2	20	243	25882	10.651	0.0149221	0.260163	MAPK1,DIABLO
Reactome	Pos	PC1	M12347	Reactome nef mediates down modulation of cell surface receptors by recruiting them to clathrin adapters	2	21	243	25882	10.1438	0.0163918	0.271056	B2M,LCK
Reactome	Pos	PC1	M878	Reactome signal transduction by l1	2	21	243	25882	10.1438	0.0163918	0.271056	MAPK1,ITGA9
Reactome	Pos	PC1	M27479	Reactome vxpx cargo targeting to cilium	2	21	243	25882	10.1438	0.0163918	0.271056	EXOC1,EXOC2
Reactome	Pos	PC1	M27485	Reactome cd209 dc sign signaling	2	21	243	25882	10.1438	0.0163918	0.271056	FYN,NFKB1
Reactome	Pos	PC1	M1072	Reactome inflammasomes	2	21	243	25882	10.1438	0.0163918	0.271056	NFKB1,BCL2
Reactome	Pos	PC1	M13408	Reactome erk mapk targets	2	22	243	25882	9.68275	0.0179207	0.287448	RPS6KA2,MAPK1
Reactome	Pos	PC1	M41722	Reactome deregulated cdk5 triggers multiple neurodegenerative pathways in alzheimer s disease models	2	22	243	25882	9.68275	0.0179207	0.287448	CDC25B,FASLG
Reactome	Pos	PC1	M903	Reactome regulation of signaling by cbl	2	22	243	25882	9.68275	0.0179207	0.287448	FYN,PIK3R1
Reactome	Pos	PC1	M27811	Reactome regulation of pten gene transcription	3	61	243	25882	5.23821	0.0197302	0.313339	MAPK1,ATN1,RPTOR
Reactome	Pos	PC1	M529	Reactome meiosis	4	111	243	25882	3.83821	0.0207947	0.322317	DIDO1,RPA1,ATM,SUN1
Reactome	Pos	PC1	M509	Reactome developmental biology	18	1132	243	25882	1.69363	0.021036	0.322317	RANBP9,FYN,PRKCQ,NCK2,RPS6KA2,PTPRC,MED15,MAPK1,MYH9,E2F1,NFKB1,CCND3,FOXP1,ADAM23,ITGA9,PIK3R1,RUNX1,EVL
Reactome	Pos	PC1	M27952	Reactome estrogen dependent nuclear events downstream of esr membrane signaling	2	24	243	25882	8.87586	0.0211508	0.322317	MAPK1,BCL2
Reactome	Pos	PC1	M519	Reactome growth hormone receptor signaling	2	24	243	25882	8.87586	0.0211508	0.322317	MAPK1,PRLR
Reactome	Pos	PC1	M29853	Reactome nervous system development	11	578	243	25882	2.02701	0.0213003	0.322317	RANBP9,FYN,PRKCQ,NCK2,RPS6KA2,PTPRC,MAPK1,MYH9,ITGA9,PIK3R1,EVL
Reactome	Pos	PC1	M7923	Reactome semaphorin interactions	3	64	243	25882	4.99267	0.0223802	0.33319	FYN,PTPRC,MYH9
Reactome	Pos	PC1	M27110	Reactome role of phospholipids in phagocytosis	2	25	243	25882	8.52082	0.0228497	0.33319	PIK3R1,CD247
Reactome	Pos	PC1	M27864	Reactome signaling by ntrk2 trkb	2	25	243	25882	8.52082	0.0228497	0.33319	FYN,PIK3R1
Reactome	Pos	PC1	M27865	Reactome signaling by erythropoietin	2	25	243	25882	8.52082	0.0228497	0.33319	PIK3R5,PIK3R1
Reactome	Pos	PC1	M27424	Reactome miscellaneous transport and binding events	2	26	243	25882	8.1931	0.0246029	0.352348	ADD3,ANKH
Reactome	Pos	PC1	M979	Reactome n glycan antennae elongation in the medial trans golgi	2	26	243	25882	8.1931	0.0246029	0.352348	MGAT4A,ST6GAL1
Reactome	Pos	PC1	M894	Reactome asparagine n linked glycosylation	7	303	243	25882	2.46063	0.0248664	0.352971	MGAT4A,ST6GAL1,MAN1C1,DAD1,TRAPPC10,GLB1,MAN1B1
Reactome	Pos	PC1	M10189	Reactome signaling by notch	6	238	243	25882	2.68513	0.0253194	0.356249	HIF1A,E2F1,DTX1,RUNX1,YWHAZ,IKZF1
Reactome	Pos	PC1	M27198	Reactome insulin processing	2	27	243	25882	7.88965	0.0264091	0.365175	EXOC1,EXOC2
Reactome	Pos	PC1	M29816	Reactome infection with mycobacterium tuberculosis	2	27	243	25882	7.88965	0.0264091	0.365175	MAPK1,B2M
Reactome	Pos	PC1	M872	Reactome l1cam interactions	4	120	243	25882	3.55034	0.026742	0.366617	RANBP9,RPS6KA2,MAPK1,ITGA9
Reactome	Pos	PC1	M27872	Reactome rab regulation of trafficking	4	121	243	25882	3.521	0.0274593	0.37326	RIC1,TRAPPC10,RAB8B,TBC1D10C
Reactome	Pos	PC1	M837	Reactome creb1 phosphorylation through nmda receptor mediated activation of ras signaling	2	28	243	25882	7.60788	0.0282674	0.377841	RPS6KA2,MAPK1
Reactome	Pos	PC1	M27555	Reactome tnfs bind their physiological receptors	2	28	243	25882	7.60788	0.0282674	0.377841	FASLG,LTA
Reactome	Pos	PC1	M27032	Reactome plasma lipoprotein assembly remodeling and clearance	3	71	243	25882	4.50043	0.0292797	0.384956	SOAT1,LDLRAP1,ABCG1
Reactome	Pos	PC1	M27382	Reactome interleukin 17 signaling	3	71	243	25882	4.50043	0.0292797	0.384956	RPS6KA2,MAPK1,NFKB1
Reactome	Pos	PC1	M41809	Reactome rac1 gtpase cycle	5	184	243	25882	2.8943	0.0301649	0.387226	VRK2,GNA13,PIK3R1,GARRE1,SPATA13
Reactome	Pos	PC1	M779	Reactome downstream signal transduction	2	29	243	25882	7.34554	0.0301766	0.387226	NCK2,PIK3R1
Reactome	Pos	PC1	M27309	Reactome epha mediated growth cone collapse	2	29	243	25882	7.34554	0.0301766	0.387226	FYN,MYH9
Reactome	Pos	PC1	M27827	Reactome cellular responses to external stimuli	12	693	243	25882	1.84433	0.0314193	0.397014	RPS6KA2,MAPK1,HIF1A,E2F1,GML,NFKB1,UBE2D2,RPA1,ETS1,RPTOR,ATM,TNIK
Reactome	Pos	PC1	M973	Reactome interferon alpha beta signaling	3	73	243	25882	4.37714	0.0314344	0.397014	IRF1,ISG20,IFITM1
Reactome	Pos	PC1	M601	Reactome antigen activates b cell receptor bcr leading to generation of second messengers	2	30	243	25882	7.10069	0.0321355	0.402698	FYN,PIK3R1
Reactome	Pos	PC1	M41814	Reactome rhog gtpase cycle	3	74	243	25882	4.31798	0.0325422	0.404633	VRK2,PIK3R1,GARRE1
Reactome	Pos	PC1	M8240	Reactome immunoregulatory interactions between a lymphoid and a non lymphoid cell	4	128	243	25882	3.32845	0.0328012	0.404716	CLEC2D,B2M,IFITM1,CD247
Reactome	Pos	PC1	M27874	Reactome extra nuclear estrogen signaling	3	75	243	25882	4.26041	0.0336701	0.406086	MAPK1,PIK3R1,BCL2
Reactome	Pos	PC1	M27252	Reactome hsf1 activation	2	31	243	25882	6.87163	0.034143	0.406086	GML,RPA1
Reactome	Pos	PC1	M15195	Reactome mapk targets nuclear events mediated by map kinases	2	31	243	25882	6.87163	0.034143	0.406086	RPS6KA2,MAPK1
Reactome	Pos	PC1	M991	Reactome transferrin endocytosis and recycling	2	31	243	25882	6.87163	0.034143	0.406086	HFE,ATP6V0A1
Reactome	Pos	PC1	M522	Reactome cell cell communication	4	130	243	25882	3.27724	0.0344312	0.406086	FYN,NCK2,ACTN1,PIK3R1
Reactome	Pos	PC1	M5283	Reactome host interactions of hiv factors	4	130	243	25882	3.27724	0.0344312	0.406086	FYN,B2M,LCK,CD247
Reactome	Pos	PC1	M27205	Reactome fceri mediated mapk activation	2	32	243	25882	6.65689	0.0361982	0.417711	MAPK1,LAT
Reactome	Pos	PC1	M861	Reactome thrombin signalling through proteinase activated receptors pars	2	32	243	25882	6.65689	0.0361982	0.417711	MAPK1,GNA13
Reactome	Pos	PC1	M27538	Reactome termination of translesion dna synthesis	2	32	243	25882	6.65689	0.0361982	0.417711	USP10,RPA1
Reactome	Pos	PC1	M27163	Reactome constitutive signaling by aberrant pi3k in cancer	3	78	243	25882	4.09655	0.0371743	0.422891	FYN,PIK3R1,LCK
Reactome	Pos	PC1	M1021	Reactome signaling by insulin receptor	3	78	243	25882	4.09655	0.0371743	0.422891	ATP6V0A1,MAPK1,PIK3R1
Reactome	Pos	PC1	M27319	Reactome sialic acid metabolism	2	33	243	25882	6.45517	0.0382998	0.426617	ST6GAL1,GLB1
Reactome	Pos	PC1	M27847	Reactome plasma lipoprotein clearance	2	33	243	25882	6.45517	0.0382998	0.426617	SOAT1,LDLRAP1
Reactome	Pos	PC1	M41819	Reactome rhov gtpase cycle	2	33	243	25882	6.45517	0.0382998	0.426617	NCK2,PIK3R1
Reactome	Pos	PC1	M16312	Reactome cell surface interactions at the vascular wall	4	135	243	25882	3.15586	0.0387093	0.428205	FYN,CD48,PIK3R1,LCK
Reactome	Pos	PC1	M13881	Reactome signalling to erks	2	34	243	25882	6.26531	0.0404469	0.432977	MAPK1,KIDINS220
Reactome	Pos	PC1	M41816	Reactome rhou gtpase cycle	2	34	243	25882	6.26531	0.0404469	0.432977	NCK2,PIK3R1
Reactome	Pos	PC1	M985	Reactome negative regulators of ddx58 ifih1 signaling	2	34	243	25882	6.26531	0.0404469	0.432977	RNF216,UBE2D2
Reactome	Pos	PC1	M26956	Reactome reproduction	4	137	243	25882	3.10979	0.040502	0.432977	DIDO1,RPA1,ATM,SUN1
Reactome	Pos	PC1	M595	Reactome downstream signaling events of b cell receptor bcr	3	81	243	25882	3.94483	0.0408579	0.432977	NFATC2,NFKB1,RASGRP1
Reactome	Pos	PC1	M1002	Reactome ddx58 ifih1 mediated induction of interferon alpha beta	3	81	243	25882	3.94483	0.0408579	0.432977	RNF216,NFKB1,UBE2D2
Reactome	Pos	PC1	M27484	Reactome c type lectin receptors clrs	4	140	243	25882	3.04315	0.0432781	0.432977	FYN,NFATC2,NFKB1,UBE2D2
Reactome	Pos	PC1	M19806	Reactome post translational protein modification	20	1408	243	25882	1.51293	0.0433974	0.432977	ADAMTS6,TNIP3,MGAT4A,ST6GAL1,WAC,HIF1A,USP10,FAM20A,MAN1C1,DAD1,UBE2D2,RPA1,SAE1,TRAPPC10,RAB8B,NSMCE1,GLB1,MAN1B1,SATB1,SPON1
Reactome	Pos	PC1	M27697	Reactome death receptor signalling	4	141	243	25882	3.02157	0.0442268	0.432977	NFKB1,FASLG,GNA13,ARHGEF3
Reactome	Pos	PC1	M1008	Reactome transcriptional regulation of white adipocyte differentiation	3	84	243	25882	3.80394	0.0447185	0.432977	MED15,NFKB1,CCND3
Reactome	Pos	PC1	M26903	Reactome activation of noxa and translocation to mitochondria	1	5	243	25882	21.3021	0.0460741	0.432977	E2F1
Reactome	Pos	PC1	M26921	Reactome activation of ras in b cells	1	5	243	25882	21.3021	0.0460741	0.432977	RASGRP1
Reactome	Pos	PC1	M29570	Reactome the fatty acid cycling model	1	5	243	25882	21.3021	0.0460741	0.432977	UCP3
Reactome	Pos	PC1	M27223	Reactome sumo is conjugated to e1 uba2 sae1	1	5	243	25882	21.3021	0.0460741	0.432977	SAE1
Reactome	Pos	PC1	M27345	Reactome sodium coupled phosphate cotransporters	1	5	243	25882	21.3021	0.0460741	0.432977	SLC20A2
Reactome	Pos	PC1	M27663	Reactome g2 phase	1	5	243	25882	21.3021	0.0460741	0.432977	E2F1
Reactome	Pos	PC1	M27710	Reactome fasl cd95l signaling	1	5	243	25882	21.3021	0.0460741	0.432977	FASLG
Reactome	Pos	PC1	M27735	Reactome ptk6 expression	1	5	243	25882	21.3021	0.0460741	0.432977	HIF1A
Reactome	Pos	PC1	M27759	Reactome reelin signalling pathway	1	5	243	25882	21.3021	0.0460741	0.432977	FYN
Reactome	Pos	PC1	M27791	Reactome runx1 regulates expression of components of tight junctions	1	5	243	25882	21.3021	0.0460741	0.432977	RUNX1
Reactome	Pos	PC1	M27800	Reactome runx1 regulates transcription of genes involved in interleukin signaling	1	5	243	25882	21.3021	0.0460741	0.432977	RUNX1
Reactome	Pos	PC1	M27825	Reactome runx3 regulates bcl2l11 bim transcription	1	5	243	25882	21.3021	0.0460741	0.432977	RUNX3
Reactome	Pos	PC1	M27845	Reactome chylomicron clearance	1	5	243	25882	21.3021	0.0460741	0.432977	LDLRAP1
Reactome	Pos	PC1	M27913	Reactome ntrk2 activates rac1	1	5	243	25882	21.3021	0.0460741	0.432977	FYN
Reactome	Pos	PC1	M27954	Reactome n glycan trimming and elongation in the cis golgi	1	5	243	25882	21.3021	0.0460741	0.432977	MAN1C1
Reactome	Pos	PC1	M27275	Reactome diseases of glycosylation	4	143	243	25882	2.97931	0.046159	0.432977	ADAMTS6,GLB1,MAN1B1,SPON1
Reactome	Pos	PC1	M27568	Reactome hdr through single strand annealing ssa	2	37	243	25882	5.75731	0.0471509	0.434359	RPA1,ATM
Reactome	Pos	PC1	M27641	Reactome regulation of tp53 expression and degradation	2	37	243	25882	5.75731	0.0471509	0.434359	PPP2R5C,ATM
Reactome	Pos	PC1	M41813	Reactome rhoh gtpase cycle	2	37	243	25882	5.75731	0.0471509	0.434359	ZAP70,LCK
Reactome	Pos	PC1	M916	Reactome platelet homeostasis	3	86	243	25882	3.71548	0.0473896	0.434359	PPP2R5C,ATP2B2,PDE9A
Reactome	Pos	PC1	M495	Reactome apoptotic cleavage of cellular proteins	2	38	243	25882	5.6058	0.0494697	0.443293	PRKCQ,SATB1
Reactome	Pos	PC1	M27255	Reactome hsf1 dependent transactivation	2	38	243	25882	5.6058	0.0494697	0.443293	GML,RPTOR
Reactome	Pos	PC1	M29842	Reactome fcgr3a mediated il10 synthesis	2	38	243	25882	5.6058	0.0494697	0.443293	FYN,CD247
Reactome	Pos	PC1	M39005	Reactome diseases of mitotic cell cycle	2	38	243	25882	5.6058	0.0494697	0.443293	E2F1,CCND3
Reactome	Pos	PC2	M1036	Reactome innate immune system	36	1045	287	25875	3.10588	1.83821e-09	2.9485e-06	FYN,RNF216,MVP,TNFRSF1B,PRKCQ,PKM,RAB27A,STK10,TXK,RAB7A,DNM2,PTPRC,HMOX2,TSPAN14,UBE2D3,ITK,ACTR3,ADGRE5,ARHGAP9,SEM1,SIGLEC9,DIAPH1,GNS,CASP1,RHOF,PSTPIP1,SURF4,ITGB2,PGLYRP4,CXCR1,BCL2,CPN2,LCK,PNP,CD247,CPNE1
Reactome	Pos	PC2	M27078	Reactome rho gtpase cycle	21	443	287	25875	4.2738	2.92394e-08	2.345e-05	TRIO,NCK2,STK10,RAB7A,HMOX2,DOCK8,LMNB1,ARHGAP9,DIAPH1,DOCK10,STAM,RHOF,ADD3,TIAM1,UBXN11,ARHGAP35,ARHGEF3,GARRE1,LCK,SPATA13,FNBP1
Reactome	Pos	PC2	M27620	Reactome neutrophil degranulation	20	478	287	25875	3.77225	4.63057e-07	0.000247581	MVP,TNFRSF1B,PKM,RAB27A,STK10,RAB7A,PTPRC,HMOX2,TSPAN14,ADGRE5,ARHGAP9,SIGLEC9,DIAPH1,GNS,RHOF,SURF4,ITGB2,CXCR1,PNP,CPNE1
Reactome	Pos	PC2	M27039	Reactome signaling by egfr	7	50	287	25875	12.622	1.27521e-06	0.000511359	PAG1,PXN,EPS15L1,STAM,SH3KBP1,TGFA,EPGN
Reactome	Pos	PC2	M41838	Reactome signaling by rho gtpases miro gtpases and rhobtb3	23	707	287	25875	2.93297	4.73767e-06	0.00133862	TRIO,NCK2,STK10,RAB7A,HMOX2,DOCK8,LMNB1,ACTR3,ARHGAP9,DIAPH1,DOCK10,STAM,RHOF,ADD3,PPP2R5E,TIAM1,UBXN11,ARHGAP35,ARHGEF3,GARRE1,LCK,SPATA13,FNBP1
Reactome	Pos	PC2	M27753	Reactome clathrin mediated endocytosis	10	144	287	25875	6.26089	5.00729e-06	0.00133862	SYNJ2,DNM2,ACTR3,EPS15L1,STAM,SH3KBP1,TGOLN2,TGFA,EPGN,FNBP1
Reactome	Pos	PC2	M11480	Reactome membrane trafficking	21	626	287	25875	3.02443	7.81179e-06	0.00179002	DTNBP1,RAB27A,RAB7A,SYNJ2,DNM2,PPP6R3,ACTR3,EPS15L1,GNS,STAM,SH3KBP1,SURF4,NBAS,TGOLN2,TRAPPC10,DENND2D,TGFA,RAB43,EPGN,FNBP1,MVB12B
Reactome	Pos	PC2	M874	Reactome signaling by interleukins	17	449	287	25875	3.41351	1.26452e-05	0.00253537	FYN,TNFRSF1B,TNFRSF1A,RORA,IL10RA,AIP,LMNB1,FASLG,PTK2B,SEM1,CASP1,GSTO1,ITGB2,HNRNPF,BCL2,STAT5B,LCK
Reactome	Pos	PC2	M27507	Reactome vesicle mediated transport	21	665	287	25875	2.84706	1.92567e-05	0.00343197	DTNBP1,RAB27A,RAB7A,SYNJ2,DNM2,PPP6R3,ACTR3,EPS15L1,GNS,STAM,SH3KBP1,SURF4,NBAS,TGOLN2,TRAPPC10,DENND2D,TGFA,RAB43,EPGN,FNBP1,MVB12B
Reactome	Pos	PC2	M16597	Reactome egfr downregulation	5	31	287	25875	14.5414	2.17493e-05	0.00348859	EPS15L1,STAM,SH3KBP1,TGFA,EPGN
Reactome	Pos	PC2	M10450	Reactome gab1 signalosome	4	17	287	25875	21.2134	3.14807e-05	0.00459045	PAG1,PXN,TGFA,EPGN
Reactome	Pos	PC2	M1060	Reactome cytokine signaling in immune system	21	701	287	25875	2.70085	4.14422e-05	0.00521998	FYN,TNFRSF1B,TNFRSF1A,RORA,NUP50,SAMHD1,UBE2D3,IL10RA,AIP,LMNB1,FASLG,PTK2B,SEM1,CASP1,GSTO1,ITGB2,HNRNPF,BCL2,STAT5B,LCK,IFITM1
Reactome	Pos	PC2	M27214	Reactome sumoylation	10	184	287	25875	4.89983	4.23066e-05	0.00521998	HIPK2,HDAC4,RORA,NUP50,DDX17,NSMCE2,RAD21,CHD3,ZNF131,TRIM27
Reactome	Pos	PC2	M15381	Reactome tcr signaling	8	117	287	25875	6.16457	4.98607e-05	0.00571261	PRKCQ,PAG1,PTPRC,FYB1,ITK,SEM1,LCK,CD247
Reactome	Pos	PC2	M27870	Reactome signaling by receptor tyrosine kinases	17	504	287	25875	3.041	5.41306e-05	0.00578836	FYN,NCK2,PAG1,DNM2,PXN,PTK2B,EPS15L1,DIAPH1,STAM,SH3KBP1,TIAM1,TGFA,HNRNPH1,HNRNPF,STAT5B,EPGN,LCK
Reactome	Pos	PC2	M26997	Reactome nef and signal transduction	3	8	287	25875	33.8088	7.25701e-05	0.00705084	FYN,LCK,CD247
Reactome	Pos	PC2	M41808	Reactome cdc42 gtpase cycle	9	159	287	25875	5.10321	7.47283e-05	0.00705084	TRIO,RAB7A,DOCK8,ARHGAP9,DOCK10,TIAM1,ARHGAP35,SPATA13,FNBP1
Reactome	Pos	PC2	M41821	Reactome rhof gtpase cycle	5	42	287	25875	10.733	9.85626e-05	0.00878302	RAB7A,LMNB1,DIAPH1,RHOF,ADD3
Reactome	Pos	PC2	M1058	Reactome adaptive immune system	21	755	287	25875	2.50767	0.000117775	0.00994266	FYN,SLAMF7,PRKCQ,RAB7A,PAG1,DNM2,PTPRC,FYB1,MGRN1,UBE2D3,ZBTB16,ITK,SEM1,SIGLEC9,FBXL8,SH3KBP1,PPP2R5E,ITGB2,LCK,IFITM1,CD247
Reactome	Pos	PC2	M27824	Reactome runx3 regulates p14 arf	3	10	287	25875	27.047	0.000152965	0.0122678	CBFB,HDAC4,RUNX1
Reactome	Pos	PC2	M1077	Reactome platelet activation signaling and aggregation	11	259	287	25875	3.82905	0.000162243	0.0123923	FYN,PRKCH,DGKA,PRKCQ,WDR1,APBB1IP,VWF,ACTN4,LHFPL2,CYRIB,LCK
Reactome	Pos	PC2	M27867	Reactome intracellular signaling by second messengers	12	307	287	25875	3.52404	0.000179049	0.0130543	FYN,TNRC6B,SEM1,ADCY3,RPTOR,PIP4K2A,PPP2R5E,TGFA,CHD3,EPGN,LCK,TRIM27
Reactome	Pos	PC2	M41809	Reactome rac1 gtpase cycle	9	184	287	25875	4.40984	0.000225889	0.0157533	TRIO,RAB7A,DOCK8,ARHGAP9,DOCK10,TIAM1,ARHGAP35,GARRE1,SPATA13
Reactome	Pos	PC2	M41811	Reactome rhod gtpase cycle	5	51	287	25875	8.8389	0.000250917	0.0167696	RAB7A,LMNB1,DIAPH1,ADD3,ARHGAP35
Reactome	Pos	PC2	M41805	Reactome rhoa gtpase cycle	8	149	287	25875	4.84063	0.000268389	0.0169266	TRIO,STK10,HMOX2,ARHGAP9,DIAPH1,TIAM1,ARHGAP35,ARHGEF3
Reactome	Pos	PC2	M27893	Reactome interleukin 2 signaling	3	12	287	25875	22.5392	0.000275855	0.0169266	PTK2B,STAT5B,LCK
Reactome	Pos	PC2	M27565	Reactome mapk family signaling cascades	12	323	287	25875	3.34948	0.000284924	0.0169266	FYN,PRKCQ,APBB1IP,CDC14A,TNRC6B,VWF,SEM1,PTPRA,PPP2R5E,TGFA,EPGN,RASA3
Reactome	Pos	PC2	M41815	Reactome rhoj gtpase cycle	5	55	287	25875	8.19607	0.000358419	0.0205323	TRIO,RAB7A,DOCK8,ARHGAP35,FNBP1
Reactome	Pos	PC2	M16523	Reactome generation of second messenger molecules	4	32	287	25875	11.2696	0.000417275	0.0230796	FYB1,ITK,LCK,CD247
Reactome	Pos	PC2	M41810	Reactome rac2 gtpase cycle	6	88	287	25875	6.14705	0.000447271	0.0239141	TRIO,RAB7A,DOCK10,TIAM1,ARHGAP35,GARRE1
Reactome	Pos	PC2	M19806	Reactome post translational protein modification	30	1408	287	25875	1.92095	0.000494722	0.0255979	HIPK2,HDAC4,RORA,RAB27A,MGAT4A,RAB7A,NUP50,DDX17,UBE2D3,ZBTB16,PPP6R3,SEM1,FBXL8,STAM,MBTPS1,ARSG,ASXL2,TGOLN2,NSMCE2,TRAPPC10,TGFA,TGFBR2,ATXN7,RAD21,CHD3,ZNF131,RAB43,MDM4,TRIM27,SPON1
Reactome	Pos	PC2	M8395	Reactome hemostasis	17	613	287	25875	2.50027	0.00054028	0.0270816	FYN,PRKCH,DGKA,PRKCQ,WDR1,APBB1IP,DOCK8,VWF,SELPLG,ACTN4,DOCK10,LHFPL2,CYRIB,PPP2R5E,PDE9A,ITGB2,LCK
Reactome	Pos	PC2	M522	Reactome cell cell communication	7	130	287	25875	4.8546	0.0006351	0.0299976	FYN,NCK2,FYB1,PXN,PTK2B,ACTN4,PLEC
Reactome	Pos	PC2	M41818	Reactome rac3 gtpase cycle	6	94	287	25875	5.75469	0.000635859	0.0299976	TRIO,RAB7A,DOCK10,TIAM1,ARHGAP35,GARRE1
Reactome	Pos	PC2	M27794	Reactome esr mediated signaling	9	213	287	25875	3.80944	0.000656619	0.0300919	CBFB,FKBP5,TNRC6B,RUNX1,TGFA,RAD21,BCL2,ZNF217,EPGN
Reactome	Pos	PC2	M7923	Reactome semaphorin interactions	5	64	287	25875	7.0435	0.000724403	0.0309725	FYN,PTPRC,PLXNC1,ARHGAP35,SEMA4D
Reactome	Pos	PC2	M27797	Reactome runx1 interacts with co factors whose precise effect on runx1 targets is not known	4	37	287	25875	9.74668	0.000733762	0.0309725	HIPK2,CBFB,ARID1A,RUNX1
Reactome	Pos	PC2	M27820	Reactome gene and protein expression by jak stat signaling after interleukin 12 stimulation	4	37	287	25875	9.74668	0.000733762	0.0309725	AIP,LMNB1,GSTO1,HNRNPF
Reactome	Pos	PC2	M27788	Reactome regulation of runx1 expression and activity	3	17	287	25875	15.91	0.000818314	0.0336558	CBFB,TNRC6B,RUNX1
Reactome	Pos	PC2	M27888	Reactome estrogen dependent gene expression	7	142	287	25875	4.44435	0.00106822	0.0418173	CBFB,TNRC6B,RUNX1,TGFA,RAD21,BCL2,ZNF217
Reactome	Pos	PC2	M27752	Reactome cargo recognition for clathrin mediated endocytosis	6	104	287	25875	5.20135	0.00108086	0.0418173	EPS15L1,STAM,SH3KBP1,TGOLN2,TGFA,EPGN
Reactome	Pos	PC2	M10959	Reactome other semaphorin interactions	3	19	287	25875	14.2353	0.00114712	0.0418173	PTPRC,PLXNC1,SEMA4D
Reactome	Pos	PC2	M27759	Reactome reelin signalling pathway	2	5	287	25875	36.0627	0.00119925	0.0418173	FYN,SH3KBP1
Reactome	Pos	PC2	M27791	Reactome runx1 regulates expression of components of tight junctions	2	5	287	25875	36.0627	0.00119925	0.0418173	CBFB,RUNX1
Reactome	Pos	PC2	M27800	Reactome runx1 regulates transcription of genes involved in interleukin signaling	2	5	287	25875	36.0627	0.00119925	0.0418173	CBFB,RUNX1
Reactome	Pos	PC2	M27804	Reactome runx2 regulates chondrocyte maturation	2	5	287	25875	36.0627	0.00119925	0.0418173	CBFB,HDAC4
Reactome	Pos	PC2	M658	Reactome chondroitin sulfate biosynthesis	3	20	287	25875	13.5235	0.00133854	0.0447295	CHSY1,CSGALNACT1,CHST11
Reactome	Pos	PC2	M39002	Reactome signaling by kit in disease	3	20	287	25875	13.5235	0.00133854	0.0447295	FYN,STAT5B,LCK
Reactome	Pos	PC2	M27869	Reactome signaling by nuclear receptors	10	289	287	25875	3.11961	0.00153876	0.0476905	CBFB,FKBP5,TNRC6B,RUNX1,TGFA,RAD21,BCL2,ZNF217,EPGN,ARL4C
Reactome	Pos	PC2	M27894	Reactome interleukin 12 signaling	4	45	287	25875	8.01394	0.00154433	0.0476905	AIP,LMNB1,GSTO1,HNRNPF
Reactome	Pos	PC2	M5876	Reactome ctla4 inhibitory signaling	3	21	287	25875	12.8795	0.00154889	0.0476905	FYN,PPP2R5E,LCK
Reactome	Pos	PC2	M1072	Reactome inflammasomes	3	21	287	25875	12.8795	0.00154889	0.0476905	CASP1,PSTPIP1,BCL2
Reactome	Pos	PC2	M27547	Reactome diseases of signal transduction by growth factor receptors and second messengers	12	393	287	25875	2.75288	0.00157581	0.0476905	FYN,HDAC4,APBB1IP,VWF,SEM1,PPP2R5E,TGFA,TGFBR2,STAT5B,EPGN,LCK,MAML2
Reactome	Pos	PC2	M713	Reactome negative regulation of the pi3k akt network	6	113	287	25875	4.78709	0.00165701	0.0492194	FYN,PIP4K2A,PPP2R5E,TGFA,EPGN,LCK
Reactome	Pos	PC2	M27787	Reactome runx1 regulates estrogen receptor mediated transcription	2	6	287	25875	30.0523	0.0017857	0.0493838	CBFB,RUNX1
Reactome	Pos	PC2	M27798	Reactome runx1 regulates transcription of genes involved in bcr signaling	2	6	287	25875	30.0523	0.0017857	0.0493838	CBFB,RUNX1
Reactome	Pos	PC2	M27801	Reactome runx1 regulates transcription of genes involved in wnt signaling	2	6	287	25875	30.0523	0.0017857	0.0493838	CBFB,RUNX1
Reactome	Pos	PC2	M41736	Reactome flt3 signaling through src family kinases	2	6	287	25875	30.0523	0.0017857	0.0493838	FYN,LCK
Reactome	Pos	PC2	M27827	Reactome cellular responses to external stimuli	17	693	287	25875	2.21164	0.00202863	0.0542414	RORA,NUP50,FKBP5,HIRA,TNRC6B,HM13,HMOX2,DNAJB6,UBE2D3,LMNB1,NFE2L2,SEM1,ETS1,CRTC3,RPTOR,DEDD2,MDM4
Reactome	Pos	PC2	M913	Reactome nephrin family interactions	3	23	287	25875	11.7596	0.00202898	0.0542414	FYN,NCK2,ACTN4
Reactome	Pos	PC2	M29853	Reactome nervous system development	15	578	287	25875	2.33971	0.00215901	0.0567712	FYN,TRIO,PRKCQ,NCK2,DNM2,PTPRC,ACTR3,SEM1,PTPRA,PLXNC1,SH3KBP1,UTRN,TIAM1,ARHGAP35,SEMA4D
Reactome	Pos	PC2	M27952	Reactome estrogen dependent nuclear events downstream of esr membrane signaling	3	24	287	25875	11.2696	0.00229995	0.0595018	TGFA,BCL2,EPGN
Reactome	Pos	PC2	M676	Reactome pi metabolism	5	84	287	25875	5.36648	0.00245143	0.0621973	INPP4A,PLEKHA5,SYNJ2,TNFAIP8,PIP4K2A
Reactome	Pos	PC2	M27799	Reactome runx1 regulates transcription of genes involved in differentiation of myeloid cells	2	7	287	25875	25.7591	0.00248169	0.0621973	CBFB,RUNX1
Reactome	Pos	PC2	M662	Reactome synthesis of pips at the plasma membrane	4	53	287	25875	6.80429	0.00283217	0.0698892	INPP4A,PLEKHA5,SYNJ2,PIP4K2A
Reactome	Pos	PC2	M27381	Reactome interleukin 12 family signaling	4	55	287	25875	6.55686	0.00324217	0.076358	AIP,LMNB1,GSTO1,HNRNPF
Reactome	Pos	PC2	M12123	Reactome effects of pip2 hydrolysis	3	27	287	25875	10.0174	0.00324332	0.076358	PRKCH,DGKA,PRKCQ
Reactome	Pos	PC2	M27325	Reactome sema4d mediated inhibition of cell attachment and migration	2	8	287	25875	22.5392	0.00328473	0.076358	ARHGAP35,SEMA4D
Reactome	Pos	PC2	M27796	Reactome runx1 regulates transcription of genes involved in differentiation of keratinocytes	2	8	287	25875	22.5392	0.00328473	0.076358	CBFB,RUNX1
Reactome	Pos	PC2	M11362	Reactome the role of nef in hiv 1 replication and disease pathogenesis	3	28	287	25875	9.65966	0.00360299	0.0813972	FYN,LCK,CD247
Reactome	Pos	PC2	M27555	Reactome tnfs bind their physiological receptors	3	28	287	25875	9.65966	0.00360299	0.0813972	TNFRSF1B,TNFRSF1A,FASLG
Reactome	Pos	PC2	M27133	Reactome egfr interacts with phospholipase c gamma	2	9	287	25875	20.0348	0.00419237	0.0933967	TGFA,EPGN
Reactome	Pos	PC2	M27784	Reactome transcriptional regulation by runx3	5	96	287	25875	4.69567	0.0043604	0.0958092	CBFB,HDAC4,SEM1,RUNX1,MAML2
Reactome	Pos	PC2	M27783	Reactome runx1 and foxp3 control the development of regulatory t lymphocytes tregs	2	10	287	25875	18.0314	0.00520222	0.112762	CBFB,RUNX1
Reactome	Pos	PC2	M27847	Reactome plasma lipoprotein clearance	3	33	287	25875	8.19607	0.00576108	0.12321	CUBN,NPC1,LIPC
Reactome	Pos	PC2	M17386	Reactome costimulation by the cd28 family	4	66	287	25875	5.46405	0.00623204	0.131529	FYN,PPP2R5E,LCK,CD247
Reactome	Pos	PC2	M27190	Reactome oncogene induced senescence	3	35	287	25875	7.72773	0.0067995	0.141642	TNRC6B,ETS1,MDM4
Reactome	Pos	PC2	M27609	Reactome interleukin 4 and interleukin 13 signaling	5	108	287	25875	4.17393	0.0071464	0.146959	TNFRSF1B,RORA,FASLG,ITGB2,BCL2
Reactome	Pos	PC2	M27108	Reactome fcgr activation	2	12	287	25875	15.0261	0.00751913	0.148897	FYN,CD247
Reactome	Pos	PC2	M11773	Reactome pecam1 interactions	2	12	287	25875	15.0261	0.00751913	0.148897	FYN,LCK
Reactome	Pos	PC2	M13618	Reactome cd28 dependent vav1 pathway	2	12	287	25875	15.0261	0.00751913	0.148897	FYN,LCK
Reactome	Pos	PC2	M41806	Reactome rhob gtpase cycle	4	70	287	25875	5.15182	0.00766063	0.149849	STK10,DIAPH1,ARHGAP35,ARHGEF3
Reactome	Pos	PC2	M27032	Reactome plasma lipoprotein assembly remodeling and clearance	4	71	287	25875	5.07926	0.00804863	0.153691	CUBN,MBTPS1,NPC1,LIPC
Reactome	Pos	PC2	M539	Reactome trans golgi network vesicle budding	4	71	287	25875	5.07926	0.00804863	0.153691	DTNBP1,DNM2,GNS,TGOLN2
Reactome	Pos	PC2	M495	Reactome apoptotic cleavage of cellular proteins	3	38	287	25875	7.11764	0.00855315	0.155901	PRKCQ,LMNB1,PLEC
Reactome	Pos	PC2	M27255	Reactome hsf1 dependent transactivation	3	38	287	25875	7.11764	0.00855315	0.155901	DNAJB6,RPTOR,DEDD2
Reactome	Pos	PC2	M29803	Reactome flt3 signaling	3	38	287	25875	7.11764	0.00855315	0.155901	FYN,STAT5B,LCK
Reactome	Pos	PC2	M29842	Reactome fcgr3a mediated il10 synthesis	3	38	287	25875	7.11764	0.00855315	0.155901	FYN,ADCY3,CD247
Reactome	Pos	PC2	M27436	Reactome programmed cell death	7	208	287	25875	3.03412	0.00878632	0.158351	PRKCQ,LMNB1,FASLG,SEM1,CASP1,BCL2,PLEC
Reactome	Pos	PC2	M649	Reactome phospholipid metabolism	7	210	287	25875	3.00523	0.00923227	0.163737	INPP4A,PLEKHA5,SYNJ2,PLAAT4,TNFAIP8,PIP4K2A,CPNE1
Reactome	Pos	PC2	M41814	Reactome rhog gtpase cycle	4	74	287	25875	4.87334	0.00928932	0.163737	TRIO,RAB7A,ARHGAP35,GARRE1
Reactome	Pos	PC2	M719	Reactome shc1 events in egfr signaling	2	14	287	25875	12.8795	0.010217	0.174341	TGFA,EPGN
Reactome	Pos	PC2	M889	Reactome dcc mediated attractive signaling	2	14	287	25875	12.8795	0.010217	0.174341	FYN,TRIO
Reactome	Pos	PC2	M27734	Reactome ptk6 regulates rho gtpases ras gtpase and map kinases	2	14	287	25875	12.8795	0.010217	0.174341	PXN,ARHGAP35
Reactome	Pos	PC2	M1012	Reactome interleukin 2 family signaling	3	41	287	25875	6.59684	0.0105484	0.178101	PTK2B,STAT5B,LCK
Reactome	Pos	PC2	M27163	Reactome constitutive signaling by aberrant pi3k in cancer	4	78	287	25875	4.62343	0.0111283	0.185319	FYN,TGFA,EPGN,LCK
Reactome	Pos	PC2	M27308	Reactome ephb mediated forward signaling	3	42	287	25875	6.43977	0.0112682	0.185319	FYN,ACTR3,TIAM1
Reactome	Pos	PC2	M1262	Reactome grb2 sos provides linkage to mapk signaling for integrins	2	15	287	25875	12.0209	0.0117032	0.185319	APBB1IP,VWF
Reactome	Pos	PC2	M12101	Reactome p130cas linkage to mapk signaling for integrins	2	15	287	25875	12.0209	0.0117032	0.185319	APBB1IP,VWF
Reactome	Pos	PC2	M9450	Reactome platelet adhesion to exposed collagen	2	15	287	25875	12.0209	0.0117032	0.185319	FYN,VWF
Reactome	Pos	PC2	M27774	Reactome inlb mediated entry of listeria monocytogenes into host cell	2	15	287	25875	12.0209	0.0117032	0.185319	STAM,SH3KBP1
Reactome	Pos	PC2	M508	Reactome signaling by scf kit	3	43	287	25875	6.29001	0.0120157	0.185319	FYN,STAT5B,LCK
Reactome	Pos	PC2	M27295	Reactome sumoylation of transcription cofactors	3	43	287	25875	6.29001	0.0120157	0.185319	HIPK2,DDX17,ZNF131
Reactome	Pos	PC2	M41827	Reactome rnd2 gtpase cycle	3	43	287	25875	6.29001	0.0120157	0.185319	UBXN11,ARHGAP35,FNBP1
Reactome	Pos	PC2	M695	Reactome glycosaminoglycan metabolism	5	124	287	25875	3.63535	0.0125262	0.191353	CHSY1,GNS,CSGALNACT1,NDST2,CHST11
Reactome	Pos	PC2	M537	Reactome regulation of kit signaling	2	16	287	25875	11.2696	0.0132781	0.197204	FYN,LCK
Reactome	Pos	PC2	M925	Reactome signal regulatory protein family interactions	2	16	287	25875	11.2696	0.0132781	0.197204	FYB1,PTK2B
Reactome	Pos	PC2	M1063	Reactome the nlrp3 inflammasome	2	16	287	25875	11.2696	0.0132781	0.197204	CASP1,PSTPIP1
Reactome	Pos	PC2	M27605	Reactome interleukin 10 signaling	3	45	287	25875	6.01045	0.0135944	0.20005	TNFRSF1B,TNFRSF1A,IL10RA
Reactome	Pos	PC2	M8240	Reactome immunoregulatory interactions between a lymphoid and a non lymphoid cell	5	128	287	25875	3.52175	0.014208	0.207178	SLAMF7,SIGLEC9,ITGB2,IFITM1,CD247
Reactome	Pos	PC2	M27189	Reactome formation of senescence associated heterochromatin foci sahf	2	17	287	25875	10.6067	0.0149394	0.210656	HIRA,LMNB1
Reactome	Pos	PC2	M27786	Reactome transcriptional regulation by runx1	7	231	287	25875	2.73202	0.0149655	0.210656	HIPK2,PRKCQ,CBFB,TNRC6B,ARID1A,SEM1,RUNX1
Reactome	Pos	PC2	M15303	Reactome apoptosis	6	179	287	25875	3.02202	0.0150956	0.210656	PRKCQ,LMNB1,FASLG,SEM1,BCL2,PLEC
Reactome	Pos	PC2	M5283	Reactome host interactions of hiv factors	5	130	287	25875	3.46757	0.0151031	0.210656	FYN,NUP50,SEM1,LCK,CD247
Reactome	Pos	PC2	M724	Reactome response to elevated platelet cytosolic ca2	5	130	287	25875	3.46757	0.0151031	0.210656	WDR1,VWF,ACTN4,LHFPL2,CYRIB
Reactome	Pos	PC2	M27175	Reactome fc epsilon receptor fceri signaling	5	131	287	25875	3.4411	0.0155645	0.213888	FYN,PRKCQ,TXK,ITK,SEM1
Reactome	Pos	PC2	M27548	Reactome infectious disease	17	857	287	25875	1.78841	0.0156016	0.213888	FYN,MGAT4A,RAB7A,NUP50,ACTR3,SEM1,STAM,CASP1,ADCY3,VAMP1,PSTPIP1,SH3KBP1,CHD3,LCK,MVB12B,CD247,TRIM27
Reactome	Pos	PC2	M10775	Reactome g alpha z signalling events	3	48	287	25875	5.6348	0.0161736	0.218004	PRKCH,PRKCQ,ADCY3
Reactome	Pos	PC2	M41832	Reactome heme signaling	3	48	287	25875	5.6348	0.0161736	0.218004	RORA,NFE2L2,CRTC3
Reactome	Pos	PC2	M16864	Reactome metabolism of carbohydrates	8	293	287	25875	2.46162	0.0170356	0.227709	PKM,NUP50,CHSY1,GNS,CSGALNACT1,HK2,NDST2,CHST11
Reactome	Pos	PC2	M27779	Reactome rab gefs exchange gtp for gdp on rabs	4	89	287	25875	4.05199	0.0173415	0.229883	RAB27A,RAB7A,TRAPPC10,DENND2D
Reactome	Pos	PC2	M27792	Reactome runx1 regulates genes involved in megakaryocyte differentiation and platelet function	4	90	287	25875	4.00697	0.0179943	0.233291	PRKCQ,CBFB,TNRC6B,RUNX1
Reactome	Pos	PC2	M678	Reactome chondroitin sulfate dermatan sulfate metabolism	3	50	287	25875	5.40941	0.018035	0.233291	CHSY1,CSGALNACT1,CHST11
Reactome	Pos	PC2	M875	Reactome netrin 1 signaling	3	50	287	25875	5.40941	0.018035	0.233291	FYN,TRIO,PRKCQ
Reactome	Pos	PC2	M27310	Reactome ephrin signaling	2	19	287	25875	9.49019	0.018513	0.235674	FYN,NCK2
Reactome	Pos	PC2	M27839	Reactome assembly of active lpl and lipc lipase complexes	2	19	287	25875	9.49019	0.018513	0.235674	MBTPS1,LIPC
Reactome	Pos	PC2	M27201	Reactome eph ephrin signaling	4	92	287	25875	3.91986	0.0193451	0.244327	FYN,NCK2,ACTR3,TIAM1
Reactome	Pos	PC2	M27646	Reactome pten regulation	5	139	287	25875	3.24305	0.0195971	0.245576	TNRC6B,SEM1,RPTOR,CHD3,TRIM27
Reactome	Pos	PC2	M2341	Reactome apoptotic execution phase	3	52	287	25875	5.20135	0.0200106	0.248814	PRKCQ,LMNB1,PLEC
Reactome	Pos	PC2	M27780	Reactome listeria monocytogenes entry into host cells	2	20	287	25875	9.01568	0.0204213	0.251967	STAM,SH3KBP1
Reactome	Pos	PC2	M27697	Reactome death receptor signalling	5	141	287	25875	3.19705	0.0207026	0.253488	TRIO,TNFRSF1A,FASLG,TIAM1,ARHGEF3
Reactome	Pos	PC2	M18810	Reactome pd 1 signaling	2	21	287	25875	8.58636	0.0224079	0.270242	LCK,CD247
Reactome	Pos	PC2	M27645	Reactome negative regulation of met activity	2	21	287	25875	8.58636	0.0224079	0.270242	STAM,SH3KBP1
Reactome	Pos	PC2	M1877	Reactome golgi associated vesicle biogenesis	3	55	287	25875	4.91764	0.0231886	0.277571	DTNBP1,DNM2,TGOLN2
Reactome	Pos	PC2	M1074	Reactome nucleotide binding domain leucine rich repeat containing receptor nlr signaling pathways	3	56	287	25875	4.82983	0.0243052	0.286504	CASP1,PSTPIP1,BCL2
Reactome	Pos	PC2	M13897	Reactome cd28 dependent pi3k akt signaling	2	22	287	25875	8.19607	0.0244708	0.286504	FYN,LCK
Reactome	Pos	PC2	M41722	Reactome deregulated cdk5 triggers multiple neurodegenerative pathways in alzheimer s disease models	2	22	287	25875	8.19607	0.0244708	0.286504	LMNB1,FASLG
Reactome	Pos	PC2	M27552	Reactome tnfr2 non canonical nf kb pathway	4	100	287	25875	3.60627	0.0253656	0.294829	TNFRSF1B,TNFRSF1A,FASLG,SEM1
Reactome	Pos	PC2	M27253	Reactome cellular response to heat stress	4	101	287	25875	3.57057	0.0261888	0.302207	NUP50,DNAJB6,RPTOR,DEDD2
Reactome	Pos	PC2	M669	Reactome downregulation of smad2 3 smad4 transcriptional activity	2	23	287	25875	7.83972	0.0266081	0.30269	UBE2D3,SKI
Reactome	Pos	PC2	M29824	Reactome response of mtb to phagocytosis	2	23	287	25875	7.83972	0.0266081	0.30269	RAB7A,TRIM27
Reactome	Pos	PC2	M11215	Reactome nrage signals death through jnk	3	59	287	25875	4.58424	0.0278267	0.309521	TRIO,TIAM1,ARHGEF3
Reactome	Pos	PC2	M41812	Reactome rhoq gtpase cycle	3	59	287	25875	4.58424	0.0278267	0.309521	RAB7A,ARHGAP35,FNBP1
Reactome	Pos	PC2	M29843	Reactome parasite infection	3	59	287	25875	4.58424	0.0278267	0.309521	FYN,ACTR3,CD247
Reactome	Pos	PC2	M509	Reactome developmental biology	20	1132	287	25875	1.59288	0.0279804	0.309521	FYN,TRIO,PRKCQ,CBFB,NCK2,DNM2,PTPRC,FAM120B,ACTR3,SEM1,PTPRA,PLXNC1,SH3KBP1,FLI1,UTRN,TIAM1,RUNX1,ARHGAP35,MAML2,SEMA4D
Reactome	Pos	PC2	M2243	Reactome sema4d in semaphorin signaling	2	24	287	25875	7.51307	0.0288179	0.316602	ARHGAP35,SEMA4D
Reactome	Pos	PC2	M27162	Reactome pi3k akt signaling in cancer	4	105	287	25875	3.43454	0.0296407	0.323426	FYN,TGFA,EPGN,LCK
Reactome	Pos	PC2	M27077	Reactome signaling by vegf	4	106	287	25875	3.40214	0.0305437	0.330343	FYN,NCK2,PXN,PTK2B
Reactome	Pos	PC2	M563	Reactome signaling by egfr in cancer	2	25	287	25875	7.21254	0.0310984	0.330343	TGFA,EPGN
Reactome	Pos	PC2	M27864	Reactome signaling by ntrk2 trkb	2	25	287	25875	7.21254	0.0310984	0.330343	FYN,TIAM1
Reactome	Pos	PC2	M41829	Reactome inactivation of csf3 g csf signaling	2	25	287	25875	7.21254	0.0310984	0.330343	UBE2D3,STAT5B
Reactome	Pos	PC2	M27862	Reactome transcriptional regulation by mecp2	3	63	287	25875	4.29318	0.0329205	0.347398	HIPK2,FKBP5,TNRC6B
Reactome	Pos	PC2	M29838	Reactome purinergic signaling in leishmaniasis infection	2	26	287	25875	6.93514	0.0334477	0.350654	CASP1,PSTPIP1
Reactome	Pos	PC2	M27771	Reactome rab geranylgeranylation	3	64	287	25875	4.2261	0.0342647	0.356887	RAB27A,RAB7A,RAB43
Reactome	Pos	PC2	M607	Reactome pre notch expression and processing	4	111	287	25875	3.24889	0.0353008	0.359537	TNRC6B,POFUT1,RUNX1,MAML2
Reactome	Pos	PC2	M41831	Reactome regulation of hmox1 expression and activity	3	65	287	25875	4.16108	0.0356369	0.359537	HM13,NFE2L2,SEM1
Reactome	Pos	PC2	M1088	Reactome metabolism of porphyrins	2	27	287	25875	6.67828	0.0358641	0.359537	COX10,HMOX2
Reactome	Pos	PC2	M760	Reactome integrin signaling	2	27	287	25875	6.67828	0.0358641	0.359537	APBB1IP,VWF
Reactome	Pos	PC2	M27632	Reactome fgfr2 alternative splicing	2	27	287	25875	6.67828	0.0358641	0.359537	HNRNPH1,HNRNPF
Reactome	Pos	PC2	M29816	Reactome infection with mycobacterium tuberculosis	2	27	287	25875	6.67828	0.0358641	0.359537	RAB7A,TRIM27
Reactome	Pos	PC2	M27451	Reactome metabolism of lipids	14	737	287	25875	1.71261	0.0365127	0.363766	INPP4A,PLEKHA5,RORA,SYNJ2,CUBN,FAM120B,ESYT2,PLAAT4,MBTPS1,ARSG,TNFAIP8,PIP4K2A,ACSF3,CPNE1
Reactome	Pos	PC2	M1662	Reactome signaling by bmp	2	28	287	25875	6.43977	0.0383457	0.375039	UBE2D3,SKI
Reactome	Pos	PC2	M27254	Reactome attenuation phase	2	28	287	25875	6.43977	0.0383457	0.375039	DNAJB6,DEDD2
Reactome	Pos	PC2	M6177	Reactome notch hlh transcription pathway	2	28	287	25875	6.43977	0.0383457	0.375039	HDAC4,MAML2
Reactome	Pos	PC2	M27113	Reactome copii mediated vesicle transport	3	68	287	25875	3.97751	0.0399211	0.385744	PPP6R3,TRAPPC10,TGFA
Reactome	Pos	PC2	M27394	Reactome sumoylation of chromatin organization proteins	3	68	287	25875	3.97751	0.0399211	0.385744	HDAC4,NUP50,CHD3
Reactome	Pos	PC2	M779	Reactome downstream signal transduction	2	29	287	25875	6.21771	0.0408908	0.39041	NCK2,STAT5B
Reactome	Pos	PC2	M27171	Reactome dap12 signaling	2	29	287	25875	6.21771	0.0408908	0.39041	FYN,LCK
Reactome	Pos	PC2	M12469	Reactome hiv infection	6	229	287	25875	2.36219	0.0430441	0.403298	FYN,NUP50,SEM1,LCK,MVB12B,CD247
Reactome	Pos	PC2	M27323	Reactome sumoylation of intracellular receptors	2	30	287	25875	6.01045	0.0434978	0.403298	HDAC4,RORA
Reactome	Pos	PC2	M27637	Reactome regulation of tp53 activity through acetylation	2	30	287	25875	6.01045	0.0434978	0.403298	PIP4K2A,CHD3
Reactome	Pos	PC2	M41825	Reactome signaling by csf3 g csf	2	30	287	25875	6.01045	0.0434978	0.403298	UBE2D3,STAT5B
Reactome	Pos	PC2	M601	Reactome antigen activates b cell receptor bcr leading to generation of second messengers	2	30	287	25875	6.01045	0.0434978	0.403298	FYN,SH3KBP1
Reactome	Pos	PC2	M27785	Reactome transcriptional regulation by runx2	4	120	287	25875	3.00523	0.044886	0.409108	CBFB,HDAC4,SEM1,RUNX1
Reactome	Pos	PC2	M5113	Reactome glycolysis	3	72	287	25875	3.75653	0.0460191	0.409108	PKM,NUP50,HK2
Reactome	Pos	PC2	M27872	Reactome rab regulation of trafficking	4	121	287	25875	2.98039	0.0460322	0.409108	RAB27A,RAB7A,TRAPPC10,DENND2D
Reactome	Pos	PC2	M41830	Reactome cytoprotection by hmox1	4	121	287	25875	2.98039	0.0460322	0.409108	HM13,HMOX2,NFE2L2,SEM1
Reactome	Pos	PC2	M27206	Reactome fceri mediated ca 2 mobilization	2	31	287	25875	5.81657	0.046165	0.409108	TXK,ITK
Reactome	Pos	PC2	M27252	Reactome hsf1 activation	2	31	287	25875	5.81657	0.046165	0.409108	DNAJB6,DEDD2
Reactome	Pos	PC2	M27805	Reactome runx2 regulates bone development	2	31	287	25875	5.81657	0.046165	0.409108	CBFB,HDAC4
Reactome	Pos	PC2	M1009	Reactome endosomal sorting complex required for transport escrt	2	31	287	25875	5.81657	0.046165	0.409108	STAM,MVB12B
Reactome	Pos	PC2	M1041	Reactome signaling by tgf beta receptor complex	3	73	287	25875	3.70507	0.0476116	0.417317	UBE2D3,SKI,TGFBR2
Reactome	Pos	PC2	M41807	Reactome rhoc gtpase cycle	3	73	287	25875	3.70507	0.0476116	0.417317	STK10,DIAPH1,ARHGAP35
Reactome	Pos	PC2	M746	Reactome signaling by gpcr	13	696	287	25875	1.68396	0.0478731	0.417328	PRKCH,TRIO,DGKA,PRKCQ,PDE8A,PDE4D,ADGRE5,ADCY3,GPR65,TIAM1,CXCR1,ARHGEF3,GRK6
Reactome	Pos	PC2	M27842	Reactome plasma lipoprotein remodeling	2	32	287	25875	5.6348	0.0488906	0.421616	MBTPS1,LIPC
Reactome	Pos	PC2	M27900	Reactome regulation of mecp2 expression and activity	2	32	287	25875	5.6348	0.0488906	0.421616	HIPK2,TNRC6B
Reactome	Pos	PC3	M16523	Reactome generation of second messenger molecules	8	32	236	25883	27.4184	3.695e-10	5.92678e-07	FYB1,GRAP2,PLCG1,CD101,CD3G,CD3D,CD3E,LAT
Reactome	Pos	PC3	M1058	Reactome adaptive immune system	27	755	236	25883	3.92211	1.64974e-09	1.32309e-06	CLEC2D,PAG1,CAPZB,FYB1,GRAP2,MGRN1,NFKB1,PTPN6,PLCG1,NFATC1,CD101,CD226,CD1C,JAML,CD3G,CTLA4,ICOS,CD3D,MALT1,RASGRP1,CD28,TRIM69,BTLA,SMURF1,CD3E,HLA-E,LAT
Reactome	Pos	PC3	M17386	Reactome costimulation by the cd28 family	9	66	236	25883	14.9555	8.81074e-09	4.27084e-06	GRAP2,PTPN6,CD3G,CTLA4,ICOS,CD3D,CD28,BTLA,CD3E
Reactome	Pos	PC3	M15381	Reactome tcr signaling	11	117	236	25883	10.3112	1.06505e-08	4.27084e-06	PAG1,FYB1,GRAP2,NFKB1,PLCG1,CD101,CD3G,CD3D,MALT1,CD3E,LAT
Reactome	Pos	PC3	M27402	Reactome repression of wnt target genes	4	14	236	25883	31.3354	6.27779e-06	0.00201392	TCF7,LEF1,TLE3,AXIN2
Reactome	Pos	PC3	M8240	Reactome immunoregulatory interactions between a lymphoid and a non lymphoid cell	8	128	236	25883	6.85461	2.36983e-05	0.0059465	CLEC2D,CD226,CD1C,JAML,CD3G,CD3D,CD3E,HLA-E
Reactome	Pos	PC3	M1060	Reactome cytokine signaling in immune system	19	701	236	25883	2.97261	2.59511e-05	0.0059465	IL4R,GRAP2,TRIM35,TNFSF8,NFKB1,CBL,IL23A,PTPN6,OPRM1,TNFSF4,PLCG1,IL6ST,ABL2,GSTO1,IL6R,SMAD3,ISG20,IL16,HLA-E
Reactome	Pos	PC3	M18810	Reactome pd 1 signaling	4	21	236	25883	20.8902	3.56971e-05	0.00715727	PTPN6,CD3G,CD3D,CD3E
Reactome	Pos	PC3	M27359	Reactome binding of tcf lef ctnnb1 to target gene promoters	3	8	236	25883	41.1276	4.0522e-05	0.00722192	TCF7,LEF1,AXIN2
Reactome	Pos	PC3	M39009	Reactome sars cov infections	8	146	236	25883	6.00952	6.06924e-05	0.00973505	ST3GAL1,ST6GAL1,CHMP4B,NR3C1,CHMP7,IL6R,ATP1A1,CHD3
Reactome	Pos	PC3	M1014	Reactome interleukin 6 signaling	3	11	236	25883	29.911	0.000116999	0.0170606	CBL,IL6ST,IL6R
Reactome	Pos	PC3	M27171	Reactome dap12 signaling	4	29	236	25883	15.1274	0.000133778	0.0178817	GRAP2,PLCG1,HLA-E,LAT
Reactome	Pos	PC3	M27206	Reactome fceri mediated ca 2 mobilization	4	31	236	25883	14.1514	0.000174712	0.020019	GRAP2,PLCG1,NFATC1,LAT
Reactome	Pos	PC3	M8395	Reactome hemostasis	16	613	236	25883	2.86261	0.000174729	0.020019	DGKA,WDR1,ACTN1,CAPZB,APLP2,DOCK9,SLC7A6,PTPN6,CD2,PLCG1,CAP1,SERPINE2,JAML,DAGLB,RASGRP1,LAT
Reactome	Pos	PC3	M646	Reactome tgf beta receptor signaling activates smads	4	32	236	25883	13.7092	0.00019825	0.0205714	CBL,TGFBR2,SMAD3,SMURF1
Reactome	Pos	PC3	M27175	Reactome fc epsilon receptor fceri signaling	7	131	236	25883	5.86043	0.000205201	0.0205714	GRAP2,NFKB1,PLCG1,NFATC1,MALT1,RASGRP1,LAT
Reactome	Pos	PC3	M27321	Reactome ca2 pathway	5	62	236	25883	8.84466	0.000256005	0.0241548	TCF7,TNRC6B,NFATC1,LEF1,AXIN2
Reactome	Pos	PC3	M27151	Reactome dap12 interactions	4	40	236	25883	10.9674	0.000475886	0.0424067	GRAP2,PLCG1,HLA-E,LAT
Reactome	Pos	PC3	M1041	Reactome signaling by tgf beta receptor complex	5	73	236	25883	7.5119	0.000547915	0.0462556	CBL,SKI,TGFBR2,SMAD3,SMURF1
Reactome	Pos	PC3	M1077	Reactome platelet activation signaling and aggregation	9	259	236	25883	3.81106	0.000655774	0.0525931	DGKA,WDR1,ACTN1,APLP2,PTPN6,CAP1,DAGLB,RASGRP1,LAT
Reactome	Pos	PC3	M27078	Reactome rho gtpase cycle	12	443	236	25883	2.97085	0.000817507	0.0624419	TRIO,ACTN1,CAPZB,DOCK9,ABL2,TPM3,MSI2,TIAM1,UBXN11,ARHGAP25,RHOH,ARHGAP45
Reactome	Pos	PC3	M39006	Reactome sars cov 1 infection	4	50	236	25883	8.7739	0.00111685	0.0814283	ST3GAL1,ST6GAL1,CHMP4B,CHMP7
Reactome	Pos	PC3	M27542	Reactome clec7a inflammasome pathway	2	6	236	25883	36.5579	0.00121218	0.0845365	NFKB1,MALT1
Reactome	Pos	PC3	M27604	Reactome interleukin 6 family signaling	3	24	236	25883	13.7092	0.00131488	0.0878779	CBL,IL6ST,IL6R
Reactome	Pos	PC3	M27110	Reactome role of phospholipids in phagocytosis	3	25	236	25883	13.1608	0.00148418	0.0940371	PLCG1,CD3G,PLA2G6
Reactome	Pos	PC3	M734	Reactome rna polymerase ii transcription	24	1357	236	25883	1.9397	0.00152429	0.0940371	KMT2C,CDK13,TCF7,FKBP5,TNRC6B,RGCC,NFKB1,OPRM1,NR3C1,RARA,RPA1,LEF1,RPTOR,TP53BP2,CAMK4,SKI,AUTS2,CTLA4,ZNF589,SMAD3,CHD3,MLLT3,MAML2,SMURF1
Reactome	Pos	PC3	M628	Reactome downregulation of tgf beta receptor signaling	3	26	236	25883	12.6547	0.00166655	0.0966327	TGFBR2,SMAD3,SMURF1
Reactome	Pos	PC3	M29623	Reactome loss of function of smad2 3 in cancer	2	7	236	25883	31.3354	0.00168685	0.0966327	TGFBR2,SMAD3
Reactome	Pos	PC3	M12123	Reactome effects of pip2 hydrolysis	3	27	236	25883	12.186	0.00186234	0.100671	DGKA,DAGLB,RASGRP1
Reactome	Pos	PC3	M27784	Reactome transcriptional regulation by runx3	5	96	236	25883	5.71217	0.00188287	0.100671	TCF7,LEF1,SMAD3,MAML2,SMURF1
Reactome	Pos	PC3	M27246	Reactome signaling by tgf beta receptor complex in cancer	2	8	236	25883	27.4184	0.00223563	0.106817	TGFBR2,SMAD3
Reactome	Pos	PC3	M27351	Reactome role of abl in robo slit signaling	2	8	236	25883	27.4184	0.00223563	0.106817	CAP1,ABL2
Reactome	Pos	PC3	M27821	Reactome runx3 regulates wnt signaling	2	8	236	25883	27.4184	0.00223563	0.106817	TCF7,LEF1
Reactome	Pos	PC3	M27288	Reactome beta catenin independent wnt signaling	6	146	236	25883	4.50714	0.00226421	0.106817	TCF7,TNRC6B,NFATC1,LEF1,AXIN2,SMURF1
Reactome	Pos	PC3	M27871	Reactome signaling by tgfb family members	5	102	236	25883	5.37616	0.00245536	0.112526	CBL,SKI,TGFBR2,SMAD3,SMURF1
Reactome	Pos	PC3	M27862	Reactome transcriptional regulation by mecp2	4	63	236	25883	6.96341	0.00263429	0.115816	FKBP5,TNRC6B,OPRM1,CAMK4
Reactome	Pos	PC3	M27752	Reactome cargo recognition for clathrin mediated endocytosis	5	104	236	25883	5.27278	0.00267156	0.115816	CBL,AAK1,LDLRAP1,CD3G,CD3D
Reactome	Pos	PC3	M26918	Reactome mapk1 erk2 activation	2	9	236	25883	24.3719	0.00285713	0.117042	IL6ST,IL6R
Reactome	Pos	PC3	M39012	Reactome maturation of protein 3a	2	9	236	25883	24.3719	0.00285713	0.117042	ST3GAL1,ST6GAL1
Reactome	Pos	PC3	M874	Reactome signaling by interleukins	11	449	236	25883	2.68688	0.00291874	0.117042	IL4R,NFKB1,CBL,IL23A,PTPN6,OPRM1,IL6ST,GSTO1,IL6R,SMAD3,IL16
Reactome	Pos	PC3	M27205	Reactome fceri mediated mapk activation	3	32	236	25883	10.2819	0.00305399	0.119478	GRAP2,PLCG1,LAT
Reactome	Pos	PC3	M41727	Reactome sars cov 2 infection	4	67	236	25883	6.54769	0.00329514	0.125843	ST3GAL1,ST6GAL1,CHMP4B,CHMP7
Reactome	Pos	PC3	M608	Reactome signaling by the b cell receptor bcr	5	110	236	25883	4.98517	0.00340287	0.126935	NFKB1,PTPN6,NFATC1,MALT1,RASGRP1
Reactome	Pos	PC3	M26896	Reactome mapk3 erk1 activation	2	10	236	25883	21.9347	0.00355	0.129414	IL6ST,IL6R
Reactome	Pos	PC3	M29803	Reactome flt3 signaling	3	38	236	25883	8.65845	0.00499011	0.17787	GRAP2,CBL,ABL2
Reactome	Pos	PC3	M11773	Reactome pecam1 interactions	2	12	236	25883	18.279	0.00514448	0.179386	PTPN6,PLCG1
Reactome	Pos	PC3	M27548	Reactome infectious disease	16	857	236	25883	2.04758	0.00557709	0.189307	ST3GAL1,ST6GAL1,CHMP4B,NFKB1,RPL34,CBL,NR3C1,PLCG1,PSTPIP1,CHMP7,CD3G,IL6R,ATP1A1,DPEP2,CHD3,CD28
Reactome	Pos	PC3	M41838	Reactome signaling by rho gtpases miro gtpases and rhobtb3	14	707	236	25883	2.17176	0.00566503	0.189307	TRIO,ACTN1,CAPZB,DOCK9,NSL1,CENPF,ABL2,TPM3,MSI2,TIAM1,UBXN11,ARHGAP25,RHOH,ARHGAP45
Reactome	Pos	PC3	M39008	Reactome translation of replicase and assembly of the replication transcription complex	2	13	236	25883	16.8729	0.00604346	0.197831	CHMP4B,CHMP7
Reactome	Pos	PC3	M29748	Reactome transcriptional regulation by ventx	3	41	236	25883	8.02491	0.00618076	0.198279	TNRC6B,NFKB1,LEF1
Reactome	Pos	PC3	M595	Reactome downstream signaling events of b cell receptor bcr	4	81	236	25883	5.41599	0.00647995	0.198691	NFKB1,NFATC1,MALT1,RASGRP1
Reactome	Pos	PC3	M39007	Reactome potential therapeutics for sars	4	81	236	25883	5.41599	0.00647995	0.198691	NR3C1,IL6R,ATP1A1,CHD3
Reactome	Pos	PC3	M27272	Reactome deactivation of the beta catenin transactivating complex	3	42	236	25883	7.83384	0.00661201	0.198691	TCF7,LEF1,TLE3
Reactome	Pos	PC3	M27943	Reactome transcriptional regulation of granulopoiesis	4	82	236	25883	5.34994	0.00676449	0.198691	CEBPE,RARA,LEF1,IL6R
Reactome	Pos	PC3	M41809	Reactome rac1 gtpase cycle	6	184	236	25883	3.57632	0.00698061	0.198691	TRIO,DOCK9,ABL2,TIAM1,ARHGAP25,ARHGAP45
Reactome	Pos	PC3	M889	Reactome dcc mediated attractive signaling	2	14	236	25883	15.6677	0.00700855	0.198691	TRIO,ABLIM1
Reactome	Pos	PC3	M508	Reactome signaling by scf kit	3	43	236	25883	7.65166	0.00706073	0.198691	GRAP2,CBL,PTPN6
Reactome	Pos	PC3	M27101	Reactome formation of the beta catenin tcf transactivating complex	4	84	236	25883	5.22256	0.0073581	0.20349	TCF7,LEF1,TLE3,AXIN2
Reactome	Pos	PC3	M1036	Reactome innate immune system	18	1045	236	25883	1.88912	0.00758637	0.204662	RNF216,CDK13,GRAP2,EEA1,NFKB1,PTPN6,PLCG1,NFATC1,CAP1,PSTPIP1,NLRC5,CD3G,MALT1,RASGRP1,ARHGAP45,PLA2G6,HLA-E,LAT
Reactome	Pos	PC3	M27079	Reactome degradation of beta catenin by the destruction complex	4	85	236	25883	5.16112	0.00766737	0.204662	TCF7,LEF1,TLE3,AXIN2
Reactome	Pos	PC3	M16312	Reactome cell surface interactions at the vascular wall	5	135	236	25883	4.06199	0.00803365	0.204662	SLC7A6,PTPN6,CD2,PLCG1,JAML
Reactome	Pos	PC3	M29701	Reactome constitutive signaling by egfrviii	2	15	236	25883	14.6232	0.00803847	0.204662	CBL,PLCG1
Reactome	Pos	PC3	M41735	Reactome negative regulation of flt3	2	15	236	25883	14.6232	0.00803847	0.204662	CBL,ABL2
Reactome	Pos	PC3	M537	Reactome regulation of kit signaling	2	16	236	25883	13.7092	0.00913198	0.218622	CBL,PTPN6
Reactome	Pos	PC3	M627	Reactome tgf beta receptor signaling in emt epithelial to mesenchymal transition	2	16	236	25883	13.7092	0.00913198	0.218622	TGFBR2,SMURF1
Reactome	Pos	PC3	M925	Reactome signal regulatory protein family interactions	2	16	236	25883	13.7092	0.00913198	0.218622	FYB1,PTPN6
Reactome	Pos	PC3	M1063	Reactome the nlrp3 inflammasome	2	16	236	25883	13.7092	0.00913198	0.218622	NFKB1,PSTPIP1
Reactome	Pos	PC3	M27753	Reactome clathrin mediated endocytosis	5	144	236	25883	3.80812	0.0104409	0.245275	CBL,AAK1,LDLRAP1,CD3G,CD3D
Reactome	Pos	PC3	M27039	Reactome signaling by egfr	3	50	236	25883	6.58042	0.010704	0.245275	PAG1,CBL,PLCG1
Reactome	Pos	PC3	M875	Reactome netrin 1 signaling	3	50	236	25883	6.58042	0.010704	0.245275	TRIO,ABLIM1,PLCG1
Reactome	Pos	PC3	M14804	Reactome extension of telomeres	3	51	236	25883	6.4514	0.0112978	0.255236	PPP6C,RPA1,SHQ1
Reactome	Pos	PC3	M27901	Reactome mecp2 regulates neuronal receptors and channels	2	18	236	25883	12.186	0.0115048	0.256302	FKBP5,OPRM1
Reactome	Pos	PC3	M11480	Reactome membrane trafficking	12	626	236	25883	2.10237	0.0127727	0.277053	CAPZB,CHMP4B,CBL,AAK1,MAN1C1,PPP6C,DENND1A,CHMP7,LDLRAP1,CD3G,CD3D,PLA2G6
Reactome	Pos	PC3	M559	Reactome constitutive signaling by ligand responsive egfr cancer variants	2	19	236	25883	11.5446	0.0127817	0.277053	CBL,PLCG1
Reactome	Pos	PC3	M27381	Reactome interleukin 12 family signaling	3	55	236	25883	5.9822	0.0138605	0.29643	IL23A,IL6ST,GSTO1
Reactome	Pos	PC3	M27881	Reactome notch4 intracellular domain regulates transcription	2	20	236	25883	10.9674	0.0141174	0.297952	SMAD3,MAML2
Reactome	Pos	PC3	M27251	Reactome hsp90 chaperone cycle for steroid hormone receptors shr	3	56	236	25883	5.87538	0.0145484	0.303061	CAPZB,FKBP5,NR3C1
Reactome	Pos	PC3	M1072	Reactome inflammasomes	2	21	236	25883	10.4451	0.0155106	0.314925	NFKB1,PSTPIP1
Reactome	Pos	PC3	M27873	Reactome interleukin 37 signaling	2	21	236	25883	10.4451	0.0155106	0.314925	PTPN6,SMAD3
Reactome	Pos	PC3	M27609	Reactome interleukin 4 and interleukin 13 signaling	4	108	236	25883	4.06199	0.0172746	0.346356	IL4R,IL23A,OPRM1,IL6R
Reactome	Pos	PC3	M26917	Reactome raf independent mapk1 3 activation	2	23	236	25883	9.53685	0.0184653	0.34845	IL6ST,IL6R
Reactome	Pos	PC3	M27023	Reactome telomere extension by telomerase	2	23	236	25883	9.53685	0.0184653	0.34845	PPP6C,SHQ1
Reactome	Pos	PC3	M669	Reactome downregulation of smad2 3 smad4 transcriptional activity	2	23	236	25883	9.53685	0.0184653	0.34845	SKI,SMAD3
Reactome	Pos	PC3	M41723	Reactome rhobtb2 gtpase cycle	2	23	236	25883	9.53685	0.0184653	0.34845	ACTN1,MSI2
Reactome	Pos	PC3	M556	Reactome termination of o glycan biosynthesis	2	23	236	25883	9.53685	0.0184653	0.34845	ST3GAL1,ST6GAL1
Reactome	Pos	PC3	M27507	Reactome vesicle mediated transport	12	665	236	25883	1.97907	0.01955	0.36463	CAPZB,CHMP4B,CBL,AAK1,MAN1C1,PPP6C,DENND1A,CHMP7,LDLRAP1,CD3G,CD3D,PLA2G6
Reactome	Pos	PC3	M563	Reactome signaling by egfr in cancer	2	25	236	25883	8.7739	0.0216366	0.394376	CBL,PLCG1
Reactome	Pos	PC3	M27864	Reactome signaling by ntrk2 trkb	2	25	236	25883	8.7739	0.0216366	0.394376	PLCG1,TIAM1
Reactome	Pos	PC3	M27867	Reactome intracellular signaling by second messengers	7	307	236	25883	2.5007	0.0230243	0.414954	TNRC6B,PLCG1,RPTOR,CAMK4,ICOS,CHD3,CD28
Reactome	Pos	PC3	M29838	Reactome purinergic signaling in leishmaniasis infection	2	26	236	25883	8.43644	0.0233008	0.415271	NFKB1,PSTPIP1
Reactome	Pos	PC3	M41804	Reactome pyroptosis	2	27	236	25883	8.12398	0.0250158	0.440938	CHMP4B,CHMP7
Reactome	Pos	PC3	M26982	Reactome budding and maturation of hiv virion	2	28	236	25883	7.83384	0.0267808	0.447462	CHMP4B,CHMP7
Reactome	Pos	PC3	M1662	Reactome signaling by bmp	2	28	236	25883	7.83384	0.0267808	0.447462	SKI,SMURF1
Reactome	Pos	PC3	M27555	Reactome tnfs bind their physiological receptors	2	28	236	25883	7.83384	0.0267808	0.447462	TNFSF8,TNFSF4
Reactome	Pos	PC3	M41724	Reactome flt3 signaling in disease	2	28	236	25883	7.83384	0.0267808	0.447462	CBL,ETV6
Reactome	Pos	PC3	M39014	Reactome translation of sars cov 1 structural proteins	2	28	236	25883	7.83384	0.0267808	0.447462	ST3GAL1,ST6GAL1
Reactome	Pos	PC3	M27214	Reactome sumoylation	5	184	236	25883	2.98026	0.0270611	0.447485	NR3C1,RARA,RPA1,CHD3,TOP1
Reactome	Pos	PC3	M27547	Reactome diseases of signal transduction by growth factor receptors and second messengers	8	393	236	25883	2.23254	0.0283627	0.463288	CBL,PLCG1,ETV6,TGFBR2,ICOS,SMAD3,CD28,MAML2
Reactome	Pos	PC3	M41728	Reactome maturation of sars cov 2 spike protein	2	29	236	25883	7.56371	0.0285945	0.463288	ST3GAL1,ST6GAL1
Reactome	Pos	PC3	M973	Reactome interferon alpha beta signaling	3	73	236	25883	4.50714	0.0291828	0.464561	PTPN6,ISG20,HLA-E
Reactome	Pos	PC3	M7847	Reactome signaling by wnt	7	323	236	25883	2.37683	0.0292523	0.464561	TCF7,TNRC6B,NFATC1,LEF1,TLE3,AXIN2,SMURF1
Reactome	Pos	PC3	M27323	Reactome sumoylation of intracellular receptors	2	30	236	25883	7.31158	0.030456	0.474285	NR3C1,RARA
Reactome	Pos	PC3	M27941	Reactome foxo mediated transcription of oxidative stress metabolic and neuronal genes	2	30	236	25883	7.31158	0.030456	0.474285	NR3C1,SMAD3
Reactome	Pos	PC3	M522	Reactome cell cell communication	4	130	236	25883	3.37458	0.0314229	0.480022	ACTN1,FYB1,PTPN6,PLEC
Reactome	Pos	PC3	M724	Reactome response to elevated platelet cytosolic ca2	4	130	236	25883	3.37458	0.0314229	0.480022	WDR1,ACTN1,APLP2,CAP1
Reactome	Pos	PC3	M1009	Reactome endosomal sorting complex required for transport escrt	2	31	236	25883	7.07572	0.0323642	0.485161	CHMP4B,CHMP7
Reactome	Pos	PC3	M29848	Reactome sealing of the nuclear envelope ne by escrt iii	2	31	236	25883	7.07572	0.0323642	0.485161	CHMP4B,CHMP7
Reactome	Pos	PC3	M27900	Reactome regulation of mecp2 expression and activity	2	32	236	25883	6.85461	0.0343182	0.509689	TNRC6B,CAMK4
Reactome	Pos	PC3	M188	Reactome amino acid transport across the plasma membrane	2	33	236	25883	6.64689	0.036317	0.524797	SLC7A6,SLC6A20
Reactome	Pos	PC3	M11725	Reactome cd28 co stimulation	2	33	236	25883	6.64689	0.036317	0.524797	GRAP2,CD28
Reactome	Pos	PC3	M27319	Reactome sialic acid metabolism	2	33	236	25883	6.64689	0.036317	0.524797	ST3GAL1,ST6GAL1
Reactome	Pos	PC3	M983	Reactome interferon signaling	5	200	236	25883	2.74184	0.0367746	0.526665	TRIM35,PTPN6,PLCG1,ISG20,HLA-E
Reactome	Pos	PC3	M1002	Reactome ddx58 ifih1 mediated induction of interferon alpha beta	3	81	236	25883	4.06199	0.0379889	0.530421	RNF216,NFKB1,NLRC5
Reactome	Pos	PC3	M27207	Reactome fceri mediated nf kb activation	3	81	236	25883	4.06199	0.0379889	0.530421	NFKB1,MALT1,RASGRP1
Reactome	Pos	PC3	M985	Reactome negative regulators of ddx58 ifih1 signaling	2	34	236	25883	6.4514	0.0383596	0.530421	RNF216,NLRC5
Reactome	Pos	PC3	M27942	Reactome late endosomal microautophagy	2	34	236	25883	6.4514	0.0383596	0.530421	CHMP4B,CHMP7
Reactome	Pos	PC3	M773	Reactome gpvi mediated activation cascade	2	35	236	25883	6.26707	0.0404451	0.545159	PTPN6,LAT
Reactome	Pos	PC3	M27190	Reactome oncogene induced senescence	2	35	236	25883	6.26707	0.0404451	0.545159	TNRC6B,ETS1
Reactome	Pos	PC3	M41738	Reactome rhobtb gtpase cycle	2	35	236	25883	6.26707	0.0404451	0.545159	ACTN1,MSI2
Reactome	Pos	PC3	M27107	Reactome fcgamma receptor fcgr dependent phagocytosis	3	86	236	25883	3.82583	0.0441035	0.561016	PLCG1,CD3G,PLA2G6
Reactome	Pos	PC3	M26921	Reactome activation of ras in b cells	1	5	236	25883	21.9347	0.0447693	0.561016	RASGRP1
Reactome	Pos	PC3	M27338	Reactome arachidonate production from dag	1	5	236	25883	21.9347	0.0447693	0.561016	DAGLB
Reactome	Pos	PC3	M27581	Reactome cd22 mediated bcr regulation	1	5	236	25883	21.9347	0.0447693	0.561016	PTPN6
Reactome	Pos	PC3	M27735	Reactome ptk6 expression	1	5	236	25883	21.9347	0.0447693	0.561016	NR3C1
Reactome	Pos	PC3	M27825	Reactome runx3 regulates bcl2l11 bim transcription	1	5	236	25883	21.9347	0.0447693	0.561016	SMAD3
Reactome	Pos	PC3	M27845	Reactome chylomicron clearance	1	5	236	25883	21.9347	0.0447693	0.561016	LDLRAP1
Reactome	Pos	PC3	M27954	Reactome n glycan trimming and elongation in the cis golgi	1	5	236	25883	21.9347	0.0447693	0.561016	MAN1C1
Reactome	Pos	PC3	M29852	Reactome signaling by membrane tethered fusions of pdgfra or pdgfrb	1	5	236	25883	21.9347	0.0447693	0.561016	ETV6
Reactome	Pos	PC3	M29842	Reactome fcgr3a mediated il10 synthesis	2	38	236	25883	5.7723	0.0469491	0.582282	PLCG1,CD3G
Reactome	Pos	PC3	M27267	Reactome transcriptional regulation by tp53	7	359	236	25883	2.13848	0.0471924	0.582282	CDK13,TNRC6B,RGCC,RPA1,RPTOR,TP53BP2,CHD3
Reactome	Neg	PC1	M27620	Reactome neutrophil degranulation	18	478	278	25883	3.50602	4.84843e-06	0.00740119	MPO,PLD1,CTSG,CRISPLD2,BIN2,GCA,AMPD3,DOCK2,GGH,MS4A3,CAMP,RAB31,PTAFR,AZU1,FCAR,ATG7,ELANE,SERPINB10
Reactome	Neg	PC1	M1036	Reactome innate immune system	28	1045	278	25883	2.49466	9.22841e-06	0.00740119	MPO,PLD1,DNM2,NLRC4,MYO9B,CTSG,CRISPLD2,MEFV,MAP2K6,BIN2,GCA,LRRFIP1,AMPD3,DOCK2,GGH,MS4A3,NLRP3,CAMP,NKIRAS2,RAB31,AHCYL1,PTAFR,AZU1,TLR6,FCAR,ATG7,ELANE,SERPINB10
Reactome	Neg	PC1	M27287	Reactome transport of small molecules	22	727	278	25883	2.81746	1.41791e-05	0.0075811	CLCN6,ADCY2,ATP8B1,ABCC6,SLCO4A1,AQP9,SGK3,CUBN,SLC1A2,SCNN1A,SGK1,CASQ2,SLC36A1,TRPM1,FXYD2,SLC24A4,NCEH1,SLC2A6,ADCY9,SLC43A2,LRRC8B,FXYD1
Reactome	Neg	PC1	M29836	Reactome leishmania infection	11	251	278	25883	4.08027	9.28818e-05	0.0372456	ADCY2,MYO9B,CTSG,MEFV,IAPP,RHBDF2,ENTPD1,CYSLTR2,ADCY9,NLRP3,AHCYL1
Reactome	Neg	PC1	M29838	Reactome purinergic signaling in leishmaniasis infection	4	26	278	25883	14.3237	0.000161606	0.045657	CTSG,MEFV,ENTPD1,NLRP3
Reactome	Neg	PC1	M997	Reactome ion channel transport	9	183	278	25883	4.5789	0.000170787	0.045657	CLCN6,ATP8B1,SGK3,SCNN1A,SGK1,CASQ2,TRPM1,FXYD2,FXYD1
Reactome	Neg	PC1	M27548	Reactome infectious disease	21	857	278	25883	2.28144	0.000416418	0.0915145	MTA3,ADCY2,MYO9B,CTSG,MEFV,MAP2K6,IAPP,RHBDF2,DOCK2,FXYD2,ENTPD1,VPS37B,BRD4,CYSLTR2,IFNGR2,ADCY9,NLRP3,ERCC3,AHCYL1,TRIM27,FXYD1
Reactome	Neg	PC1	M27454	Reactome cardiac conduction	7	127	278	25883	5.13173	0.000456431	0.0915145	HIPK2,CASQ2,FXYD2,CACNA1C,AHCYL1,KCNE1,FXYD1
Reactome	Neg	PC1	M512	Reactome dag and ip3 signaling	4	41	278	25883	9.08335	0.00096477	0.1504	ADCY2,CAMKK2,ADCY9,AHCYL1
Reactome	Neg	PC1	M27200	Reactome stimuli sensing channels	6	106	278	25883	5.27006	0.00101162	0.1504	CLCN6,SGK3,SCNN1A,SGK1,CASQ2,TRPM1
Reactome	Neg	PC1	M17034	Reactome integration of energy metabolism	6	108	278	25883	5.17246	0.00111475	0.1504	ADCY2,PRKAG2,CACNA1C,CYSLTR2,ADCY9,AHCYL1
Reactome	Neg	PC1	M29852	Reactome signaling by membrane tethered fusions of pdgfra or pdgfrb	2	5	278	25883	37.2417	0.00112519	0.1504	BIN2,ETV6
Reactome	Neg	PC1	M11480	Reactome membrane trafficking	16	626	278	25883	2.37966	0.0013042	0.160919	DNM2,PACSIN2,AP4S1,DENND3,PRKAG2,DENND1A,COG2,VPS37B,COPS3,VPS53,GALNT2,TBC1D24,RAB31,MCFD2,ACBD3,ITSN1
Reactome	Neg	PC1	M1072	Reactome inflammasomes	3	21	278	25883	13.3006	0.00141259	0.161842	NLRC4,MEFV,NLRP3
Reactome	Neg	PC1	M27562	Reactome protein repair	2	6	278	25883	31.0348	0.00167581	0.1792	PCMT1,MSRB1
Reactome	Neg	PC1	M39007	Reactome potential therapeutics for sars	5	81	278	25883	5.74718	0.00181687	0.182141	MTA3,FXYD2,BRD4,IFNGR2,FXYD1
Reactome	Neg	PC1	M29815	Reactome suppression of apoptosis	2	7	278	25883	26.6012	0.00232951	0.208953	CTSG,TRIM27
Reactome	Neg	PC1	M27507	Reactome vesicle mediated transport	16	665	278	25883	2.2401	0.0023952	0.208953	DNM2,PACSIN2,AP4S1,DENND3,PRKAG2,DENND1A,COG2,VPS37B,COPS3,VPS53,GALNT2,TBC1D24,RAB31,MCFD2,ACBD3,ITSN1
Reactome	Neg	PC1	M26911	Reactome g protein mediated events	4	54	278	25883	6.89662	0.0027018	0.208953	ADCY2,CAMKK2,ADCY9,AHCYL1
Reactome	Neg	PC1	M27460	Reactome ion homeostasis	4	54	278	25883	6.89662	0.0027018	0.208953	CASQ2,FXYD2,AHCYL1,FXYD1
Reactome	Neg	PC1	M27451	Reactome metabolism of lipids	17	737	278	25883	2.14759	0.00273567	0.208953	OSBPL5,PLD1,PRKAG2,CUBN,MTMR4,PIK3R3,OSBPL9,MED13L,ALOX5AP,ACSL1,PI4K2A,GPAT4,NEU3,INPP5D,CERS6,GBA,RXRA
Reactome	Neg	PC1	M1074	Reactome nucleotide binding domain leucine rich repeat containing receptor nlr signaling pathways	4	56	278	25883	6.65031	0.00308581	0.224984	NLRC4,MEFV,MAP2K6,NLRP3
Reactome	Neg	PC1	M19522	Reactome adenylate cyclase activating pathway	2	10	278	25883	18.6209	0.00488665	0.325652	ADCY2,ADCY9
Reactome	Neg	PC1	M38994	Reactome signaling by braf and raf fusions	4	64	278	25883	5.81902	0.00499348	0.325652	CLCN6,KSR1,TRAK1,ATG7
Reactome	Neg	PC1	M11575	Reactome glucagon signaling in metabolic regulation	3	33	278	25883	8.46403	0.00527043	0.325652	ADCY2,CYSLTR2,ADCY9
Reactome	Neg	PC1	M5485	Reactome muscle contraction	7	195	278	25883	3.34221	0.00527865	0.325652	HIPK2,CASQ2,FXYD2,CACNA1C,AHCYL1,KCNE1,FXYD1
Reactome	Neg	PC1	M41721	Reactome formation of apoptosome	2	11	278	25883	16.9281	0.00593041	0.34423	UACA,APIP
Reactome	Neg	PC1	M27867	Reactome intracellular signaling by second messengers	9	307	278	25883	2.72944	0.00621552	0.34423	MTA3,ADCY2,CAMKK2,PIK3R3,PHC2,PIK3AP1,ADCY9,AHCYL1,TRIM27
Reactome	Neg	PC1	M27190	Reactome oncogene induced senescence	3	35	278	25883	7.98037	0.00622361	0.34423	E2F3,ETS2,TFDP1
Reactome	Neg	PC1	M749	Reactome ca dependent events	3	37	278	25883	7.549	0.00727314	0.38887	ADCY2,CAMKK2,ADCY9
Reactome	Neg	PC1	M649	Reactome phospholipid metabolism	7	210	278	25883	3.10348	0.00781463	0.392716	OSBPL5,PLD1,MTMR4,PIK3R3,PI4K2A,GPAT4,INPP5D
Reactome	Neg	PC1	M29842	Reactome fcgr3a mediated il10 synthesis	3	38	278	25883	7.35034	0.00783474	0.392716	ADCY2,ADCY9,AHCYL1
Reactome	Neg	PC1	M26907	Reactome cytochrome c mediated apoptotic response	2	13	278	25883	14.3237	0.00829222	0.403052	UACA,APIP
Reactome	Neg	PC1	M15514	Reactome transmission across chemical synapses	8	268	278	25883	2.77923	0.00870826	0.410825	ADCY2,PRKAG2,SLC1A2,CAMKK2,ALDH2,GRIP1,SYN2,ADCY9
Reactome	Neg	PC1	M29840	Reactome anti inflammatory response favouring leishmania parasite infection	6	166	278	25883	3.36522	0.00925534	0.416439	ADCY2,IAPP,RHBDF2,CYSLTR2,ADCY9,AHCYL1
Reactome	Neg	PC1	M750	Reactome adenylate cyclase inhibitory pathway	2	14	278	25883	13.3006	0.00960614	0.416439	ADCY2,ADCY9
Reactome	Neg	PC1	M27098	Reactome carnitine metabolism	2	14	278	25883	13.3006	0.00960614	0.416439	PRKAG2,RXRA
Reactome	Neg	PC1	M897	Reactome biosynthesis of the n glycan precursor dolichol lipid linked oligosaccharide llo and transfer to a nascent protein	4	78	278	25883	4.77458	0.00997937	0.421234	ALG9,GMDS,NAGK,NEU3
Reactome	Neg	PC1	M27456	Reactome phase 2 plateau phase	2	15	278	25883	12.4139	0.011006	0.452658	CACNA1C,KCNE1
Reactome	Neg	PC1	M27626	Reactome oncogenic mapk signaling	4	81	278	25883	4.59774	0.011354	0.455296	CLCN6,KSR1,TRAK1,ATG7
Reactome	Neg	PC1	M27943	Reactome transcriptional regulation of granulopoiesis	4	82	278	25883	4.54167	0.0118379	0.463122	SPI1,CSF3R,RXRA,TFDP1
Reactome	Neg	PC1	M639	Reactome synthesis of pips at the early endosome membrane	2	16	278	25883	11.638	0.0124899	0.465903	MTMR4,PI4K2A
Reactome	Neg	PC1	M1063	Reactome the nlrp3 inflammasome	2	16	278	25883	11.638	0.0124899	0.465903	MEFV,NLRP3
Reactome	Neg	PC1	M676	Reactome pi metabolism	4	84	278	25883	4.43354	0.0128449	0.468256	MTMR4,PIK3R3,PI4K2A,INPP5D
Reactome	Neg	PC1	M26995	Reactome pka activation in glucagon signalling	2	17	278	25883	10.9534	0.0140558	0.490121	ADCY2,ADCY9
Reactome	Neg	PC1	M38998	Reactome aberrant regulation of mitotic g1 s transition in cancer due to rb1 defects	2	17	278	25883	10.9534	0.0140558	0.490121	E2F3,TFDP1
Reactome	Neg	PC1	M6467	Reactome opioid signalling	4	90	278	25883	4.13797	0.016188	0.55246	ADCY2,CAMKK2,ADCY9,AHCYL1
Reactome	Neg	PC1	M678	Reactome chondroitin sulfate dermatan sulfate metabolism	3	50	278	25883	5.58626	0.0165705	0.55373	XYLT1,CHSY1,CHST11
Reactome	Neg	PC1	M27188	Reactome cellular senescence	6	190	278	25883	2.94014	0.0170632	0.554159	MAP2K6,E2F3,PHC2,ETS2,EP400,TFDP1
Reactome	Neg	PC1	M27423	Reactome vegfr2 mediated cell proliferation	2	19	278	25883	9.80045	0.0174261	0.554159	PRKCZ,AHCYL1
Reactome	Neg	PC1	M920	Reactome aquaporin mediated transport	3	52	278	25883	5.3714	0.0183949	0.554159	ADCY2,AQP9,ADCY9
Reactome	Neg	PC1	M26909	Reactome apoptotic factor mediated response	2	20	278	25883	9.31043	0.0192268	0.554159	UACA,APIP
Reactome	Neg	PC1	M759	Reactome pka mediated phosphorylation of creb	2	20	278	25883	9.31043	0.0192268	0.554159	ADCY2,ADCY9
Reactome	Neg	PC1	M658	Reactome chondroitin sulfate biosynthesis	2	20	278	25883	9.31043	0.0192268	0.554159	CHSY1,CHST11
Reactome	Neg	PC1	M29849	Reactome signaling by pdgfr in disease	2	20	278	25883	9.31043	0.0192268	0.554159	BIN2,ETV6
Reactome	Neg	PC1	M662	Reactome synthesis of pips at the plasma membrane	3	53	278	25883	5.27006	0.0193472	0.554159	PIK3R3,PI4K2A,INPP5D
Reactome	Neg	PC1	M39009	Reactome sars cov infections	5	146	278	25883	3.1885	0.0209271	0.570284	MTA3,FXYD2,BRD4,IFNGR2,FXYD1
Reactome	Neg	PC1	M7455	Reactome intrinsic pathway for apoptosis	3	55	278	25883	5.07842	0.0213323	0.570284	UACA,APIP,TFDP1
Reactome	Neg	PC1	M490	Reactome pyruvate metabolism and citric acid tca cycle	3	55	278	25883	5.07842	0.0213323	0.570284	L2HGDH,ME3,RXRA
Reactome	Neg	PC1	M971	Reactome ion transport by p type atpases	3	55	278	25883	5.07842	0.0213323	0.570284	ATP8B1,FXYD2,FXYD1
Reactome	Neg	PC1	M27078	Reactome rho gtpase cycle	10	443	278	25883	2.10168	0.0221532	0.582521	PLD1,MYO9B,DAAM1,DOCK8,PIK3R3,DOCK2,TEX2,UACA,GFOD1,ITSN1
Reactome	Neg	PC1	M41805	Reactome rhoa gtpase cycle	5	149	278	25883	3.12431	0.0226155	0.585084	PLD1,MYO9B,DAAM1,DOCK2,TEX2
Reactome	Neg	PC1	M27871	Reactome signaling by tgfb family members	4	102	278	25883	3.65115	0.0243916	0.621017	PRKCZ,MTMR4,ACVR1B,TFDP1
Reactome	Neg	PC1	M29824	Reactome response of mtb to phagocytosis	2	23	278	25883	8.09603	0.0250688	0.628286	CTSG,TRIM27
Reactome	Neg	PC1	M29619	Reactome chromatin modifying enzymes	7	267	278	25883	2.44094	0.0258381	0.637605	PHF20,MTA3,ELP1,ASH2L,KDM2A,SETD2,EP400
Reactome	Neg	PC1	M27547	Reactome diseases of signal transduction by growth factor receptors and second messengers	9	393	278	25883	2.13216	0.0269152	0.654122	CLCN6,BIN2,PIK3R3,LRRFIP1,ETV6,KSR1,PIK3AP1,TRAK1,ATG7
Reactome	Neg	PC1	M823	Reactome transport of inorganic cations anions and amino acids oligopeptides	4	106	278	25883	3.51337	0.0275933	0.660591	SLC1A2,SLC36A1,SLC24A4,SLC43A2
Reactome	Neg	PC1	M41808	Reactome cdc42 gtpase cycle	5	159	278	25883	2.92781	0.0288712	0.667603	PLD1,MYO9B,DAAM1,DOCK8,ITSN1
Reactome	Neg	PC1	M27110	Reactome role of phospholipids in phagocytosis	2	25	278	25883	7.44835	0.0293126	0.667603	PLD1,AHCYL1
Reactome	Neg	PC1	M921	Reactome interleukin receptor shc signaling	2	25	278	25883	7.44835	0.0293126	0.667603	PIK3R3,INPP5D
Reactome	Neg	PC1	M27498	Reactome regulation of tp53 activity	5	160	278	25883	2.90951	0.029551	0.667603	PHF20,HIPK2,PRKAG2,MAP2K6,SGK1
Reactome	Neg	PC1	M892	Reactome synthesis of substrates in n glycan biosythesis	3	63	278	25883	4.43354	0.0303454	0.676029	GMDS,NAGK,NEU3
Reactome	Neg	PC1	M735	Reactome neuronal system	9	409	278	25883	2.04875	0.0334758	0.733068	ADCY2,PRKAG2,SLC1A2,CAMKK2,ALDH2,GRIP1,SYN2,ADCY9,KCNA2
Reactome	Neg	PC1	M29816	Reactome infection with mycobacterium tuberculosis	2	27	278	25883	6.89662	0.0338198	0.733068	CTSG,TRIM27
Reactome	Neg	PC1	M27948	Reactome activation of ampk downstream of nmdars	2	28	278	25883	6.65031	0.0361681	0.773516	PRKAG2,CAMKK2
Reactome	Neg	PC1	M27186	Reactome oxidative stress induced senescence	4	118	278	25883	3.15608	0.0386427	0.799486	MAP2K6,E2F3,PHC2,TFDP1
Reactome	Neg	PC1	M746	Reactome signaling by gpcr	13	696	278	25883	1.73902	0.0387199	0.799486	ADCY2,CAMKK2,ECE1,PIK3R3,IAPP,HRH4,CYSLTR2,ADCY9,DAGLB,AHCYL1,PTAFR,ITSN1,HCAR3
Reactome	Neg	PC1	M27267	Reactome transcriptional regulation by tp53	8	359	278	25883	2.07475	0.0409593	0.799486	PHF20,HIPK2,NLRC4,PRKAG2,MAP2K6,SGK1,ERCC3,TFDP1
Reactome	Neg	PC1	M601	Reactome antigen activates b cell receptor bcr leading to generation of second messengers	2	30	278	25883	6.20695	0.0410461	0.799486	PIK3AP1,AHCYL1
Reactome	Neg	PC1	M539	Reactome trans golgi network vesicle budding	3	71	278	25883	3.93399	0.0410572	0.799486	DNM2,AP4S1,ACBD3
Reactome	Neg	PC1	M27872	Reactome rab regulation of trafficking	4	121	278	25883	3.07783	0.0417469	0.799486	DENND3,DENND1A,TBC1D24,RAB31
Reactome	Neg	PC1	M41838	Reactome signaling by rho gtpases miro gtpases and rhobtb3	13	707	278	25883	1.71196	0.0429532	0.799486	PRKCZ,PLD1,MYO9B,DAAM1,DOCK8,PIK3R3,DOCK2,TEX2,UACA,GFOD1,LIMK2,TRAK1,ITSN1
Reactome	Neg	PC1	M1041	Reactome signaling by tgf beta receptor complex	3	73	278	25883	3.8262	0.0439952	0.799486	PRKCZ,MTMR4,TFDP1
Reactome	Neg	PC1	M41814	Reactome rhog gtpase cycle	3	74	278	25883	3.7745	0.0455026	0.799486	PLD1,DOCK2,ITSN1
Reactome	Neg	PC1	M26976	Reactome activation of matrix metalloproteinases	2	32	278	25883	5.81902	0.0461555	0.799486	CTSG,ELANE
Reactome	Neg	PC1	M188	Reactome amino acid transport across the plasma membrane	2	33	278	25883	5.64269	0.0487933	0.799486	SLC36A1,SLC43A2
Reactome	Neg	PC1	M27847	Reactome plasma lipoprotein clearance	2	33	278	25883	5.64269	0.0487933	0.799486	CUBN,NCEH1
Reactome	Neg	PC1	M41809	Reactome rac1 gtpase cycle	5	184	278	25883	2.53001	0.0489441	0.799486	PLD1,MYO9B,DOCK8,PIK3R3,DOCK2
Reactome	Neg	PC2	M601	Reactome antigen activates b cell receptor bcr leading to generation of second messengers	7	30	273	25855	22.0983	2.24129e-08	3.59503e-05	BLNK,BLK,ITPR1,ORAI2,SYK,STIM1,CD19
Reactome	Neg	PC2	M608	Reactome signaling by the b cell receptor bcr	9	110	273	25855	7.74875	2.62009e-06	0.00210132	BLNK,NFATC1,BLK,ITPR1,ORAI2,SYK,STIM1,CD19,CARD11
Reactome	Neg	PC2	M1058	Reactome adaptive immune system	23	755	273	25855	2.88511	6.10841e-06	0.00326596	PPP2R5C,BLNK,CD81,FBXL4,MAPKAP1,KLC1,NFATC1,BLK,PTPRJ,ITPR1,FBXO32,ORAI2,SYK,STIM1,INPP5D,UBE2O,CD19,RNF41,UBE2E2,ZNRF1,CARD11,HLA-DOB,LILRA2
Reactome	Neg	PC2	M27107	Reactome fcgamma receptor fcgr dependent phagocytosis	6	86	273	25855	6.60746	0.000304215	0.0980484	LIMK1,ITPR1,ELMO1,VAV2,SYK,PRKCE
Reactome	Neg	PC2	M27206	Reactome fceri mediated ca 2 mobilization	4	31	273	25855	12.2203	0.000305637	0.0980484	NFATC1,ITPR1,VAV2,SYK
Reactome	Neg	PC2	M27098	Reactome carnitine metabolism	3	14	273	25855	20.2943	0.000388817	0.103944	PRKAG2,CPT1A,SLC22A5
Reactome	Neg	PC2	M26945	Reactome elevation of cytosolic ca2 levels	3	16	273	25855	17.7576	0.000588899	0.134942	ITPR1,ORAI2,STIM1
Reactome	Neg	PC2	M8395	Reactome hemostasis	16	613	273	25855	2.47196	0.000877837	0.176006	CD9,CD84,DGKD,PPP2R5C,KIF16B,KLC1,ITPR1,ANGPT1,VAV2,ORAI2,SYK,STIM1,INPP5D,GP9,PRKCE,GNG7
Reactome	Neg	PC2	M27544	Reactome formation of xylulose 5 phosphate	2	5	273	25855	37.8828	0.00108775	0.188806	SORD,CRYL1
Reactome	Neg	PC2	M27416	Reactome o linked glycosylation	6	111	273	25855	5.1193	0.0011771	0.188806	ST6GAL1,SEMA5B,GALNT7,LARGE1,GALNT2,MUC4
Reactome	Neg	PC2	M800	Reactome g alpha 12 13 signalling events	5	80	273	25855	5.91918	0.00159572	0.232685	ARHGEF7,ARHGEF2,FGD2,VAV2,GNG7
Reactome	Neg	PC2	M916	Reactome platelet homeostasis	5	86	273	25855	5.50622	0.00219651	0.278207	PPP2R5C,ITPR1,ORAI2,STIM1,GNG7
Reactome	Neg	PC2	M27110	Reactome role of phospholipids in phagocytosis	3	25	273	25855	11.3648	0.0022548	0.278207	ITPR1,SYK,PRKCE
Reactome	Neg	PC2	M12123	Reactome effects of pip2 hydrolysis	3	27	273	25855	10.523	0.00282328	0.306645	DGKD,ITPR1,PRKCE
Reactome	Neg	PC2	M27870	Reactome signaling by receptor tyrosine kinases	13	504	273	25855	2.44284	0.00289915	0.306645	RBFOX2,ARHGEF7,FGF6,MAPKAP1,LRIG1,PTPRJ,ITPR1,ELMO1,MAPK13,VAV2,PRKCE,RNF41,COL11A2
Reactome	Neg	PC2	M924	Reactome platelet calcium homeostasis	3	28	273	25855	10.1472	0.0031376	0.306645	ITPR1,ORAI2,STIM1
Reactome	Neg	PC2	M27547	Reactome diseases of signal transduction by growth factor receptors and second messengers	11	393	273	25855	2.65083	0.00324998	0.306645	PPP2R5C,FGF6,MAPKAP1,OS9,ETV6,KSR1,LRP5,KSR2,TNKS,CD19,SND1
Reactome	Neg	PC2	M11215	Reactome nrage signals death through jnk	4	59	273	25855	6.42081	0.00350937	0.312723	ARHGEF7,ARHGEF2,FGD2,VAV2
Reactome	Neg	PC2	M546	Reactome o linked glycosylation of mucins	4	62	273	25855	6.11013	0.00419687	0.354304	ST6GAL1,GALNT7,GALNT2,MUC4
Reactome	Neg	PC2	M27077	Reactome signaling by vegf	5	106	273	25855	4.46731	0.00539353	0.417856	MAPKAP1,ITPR1,ELMO1,MAPK13,VAV2
Reactome	Neg	PC2	M27405	Reactome signaling by wnt in cancer	3	34	273	25855	8.3565	0.00547069	0.417856	PPP2R5C,LRP5,TNKS
Reactome	Neg	PC2	M27466	Reactome clec7a dectin 1 induces nfat activation	2	11	273	25855	17.2194	0.00573727	0.418299	NFATC1,ITPR1
Reactome	Neg	PC2	M600	Reactome g alpha i signalling events	9	314	273	25855	2.71453	0.00643272	0.433667	CCR6,CNR1,PPP3CC,ITPR1,CXCR5,ADORA1,PNOC,GNG7,RGS6
Reactome	Neg	PC2	M1077	Reactome platelet activation signaling and aggregation	8	259	273	25855	2.92531	0.00648879	0.433667	CD9,DGKD,ITPR1,VAV2,SYK,GP9,PRKCE,GNG7
Reactome	Neg	PC2	M746	Reactome signaling by gpcr	15	696	273	25855	2.0411	0.00747354	0.479502	DGKD,ARHGEF7,CCR6,ARHGEF2,CNR1,PPP3CC,FGD2,ITPR1,VAV2,CXCR5,ADORA1,PNOC,PRKCE,GNG7,RGS6
Reactome	Neg	PC2	M19832	Reactome cell death signalling via nrage nrif and nade	4	76	273	25855	4.98458	0.0086084	0.531072	ARHGEF7,ARHGEF2,FGD2,VAV2
Reactome	Neg	PC2	M966	Reactome n glycan antennae elongation	2	15	273	25855	12.6276	0.0106527	0.632849	ST6GAL1,MGAT5
Reactome	Neg	PC2	M914	Reactome interleukin 3 interleukin 5 and gm csf signaling	3	46	273	25855	6.17654	0.0126506	0.69684	BLNK,SYK,INPP5D
Reactome	Neg	PC2	M27175	Reactome fc epsilon receptor fceri signaling	5	131	273	25855	3.61477	0.012827	0.69684	NFATC1,ITPR1,VAV2,SYK,CARD11
Reactome	Neg	PC2	M16864	Reactome metabolism of carbohydrates	8	293	273	25855	2.58586	0.0130332	0.69684	PGM1,XYLT1,CEMIP,GCK,SORD,CRYL1,FUT10,RPEL1
Reactome	Neg	PC2	M1036	Reactome innate immune system	19	1045	273	25855	1.72194	0.0156218	0.808301	PGM1,NOD1,LIMK1,CD81,CCR6,HVCN1,NFATC1,MUC4,PTPRJ,ITPR1,ELMO1,MAPK13,VAV2,SYK,PRKCE,CD19,MME,PELI1,CARD11
Reactome	Neg	PC2	M27484	Reactome c type lectin receptors clrs	5	140	273	25855	3.38239	0.0166637	0.816586	NFATC1,MUC4,ITPR1,SYK,CARD11
Reactome	Neg	PC2	M27867	Reactome intracellular signaling by second messengers	8	307	273	25855	2.46793	0.0168001	0.816586	PHLPP2,PPP2R5C,FGF6,MAPKAP1,ITPR1,PRKCE,TNKS,CD19
Reactome	Neg	PC2	M5485	Reactome muscle contraction	6	195	273	25855	2.91406	0.0177502	0.837391	MYH3,ITPR1,ORAI2,STIM1,NPR1,MYL4
Reactome	Neg	PC2	M27460	Reactome ion homeostasis	3	54	273	25855	5.2615	0.0194401	0.87342	ITPR1,ORAI2,STIM1
Reactome	Neg	PC2	M9400	Reactome p75 ntr receptor mediated signalling	4	97	273	25855	3.90544	0.0196029	0.87342	ARHGEF7,ARHGEF2,FGD2,VAV2
Reactome	Neg	PC2	M27645	Reactome negative regulation of met activity	2	21	273	25855	9.01971	0.020439	0.88606	LRIG1,PTPRJ
Reactome	Neg	PC2	M27467	Reactome clec7a dectin 1 signaling	4	100	273	25855	3.78828	0.0216535	0.914007	NFATC1,ITPR1,SYK,CARD11
Reactome	Neg	PC2	M903	Reactome regulation of signaling by cbl	2	22	273	25855	8.60972	0.0223284	0.918328	BLNK,SYK
Reactome	Neg	PC2	M556	Reactome termination of o glycan biosynthesis	2	23	273	25855	8.23539	0.024287	0.959399	ST6GAL1,MUC4
Reactome	Neg	PC2	M29843	Reactome parasite infection	3	59	273	25855	4.81561	0.0245233	0.959399	ELMO1,VAV2,SYK
Reactome	Neg	PC2	M41808	Reactome cdc42 gtpase cycle	5	159	273	25855	2.97821	0.0270966	0.961188	ARHGEF7,SH3PXD2A,ARHGAP24,FGD2,VAV2
Reactome	Neg	PC2	M27498	Reactome regulation of tp53 activity	5	160	273	25855	2.95959	0.0277385	0.961188	PPP2R5C,PRKAG2,MAPKAP1,RFC3,EHMT1
Reactome	Neg	PC2	M27321	Reactome ca2 pathway	3	62	273	25855	4.58259	0.0278842	0.961188	NFATC1,ITPR1,GNG7
Reactome	Neg	PC2	M541	Reactome resolution of ap sites via the multiple nucleotide patch replacement pathway	2	25	273	25855	7.57656	0.0284051	0.961188	RFC3,PARP1
Reactome	Neg	PC2	M7923	Reactome semaphorin interactions	3	64	273	25855	4.43939	0.0302539	0.961188	PLXND1,DPYSL2,LIMK1
Reactome	Neg	PC2	M38994	Reactome signaling by braf and raf fusions	3	64	273	25855	4.43939	0.0302539	0.961188	KSR1,KSR2,SND1
Reactome	Neg	PC2	M26922	Reactome fertilization	2	26	273	25855	7.28515	0.0305615	0.961188	CD9,HVCN1
Reactome	Neg	PC2	M27053	Reactome synthesis of ip3 and ip4 in the cytosol	2	26	273	25855	7.28515	0.0305615	0.961188	INPP5D,INPP5J
Reactome	Neg	PC2	M27483	Reactome dectin 2 family	2	26	273	25855	7.28515	0.0305615	0.961188	MUC4,SYK
Reactome	Neg	PC2	M979	Reactome n glycan antennae elongation in the medial trans golgi	2	26	273	25855	7.28515	0.0305615	0.961188	ST6GAL1,MGAT5
Reactome	Neg	PC2	M713	Reactome negative regulation of the pi3k akt network	4	113	273	25855	3.35246	0.0320199	0.987692	PHLPP2,PPP2R5C,FGF6,CD19
Reactome	Neg	PC2	M27422	Reactome vegfr2 mediated vascular permeability	2	27	273	25855	7.01533	0.0327805	0.992074	MAPKAP1,VAV2
Reactome	Neg	PC2	M27303	Reactome diseases associated with o glycosylation of proteins	3	68	273	25855	4.17825	0.035301	1	SEMA5B,LARGE1,MUC4
Reactome	Neg	PC2	M27171	Reactome dap12 signaling	2	29	273	25855	6.53151	0.0374006	1	VAV2,SYK
Reactome	Neg	PC2	M41728	Reactome maturation of sars cov 2 spike protein	2	29	273	25855	6.53151	0.0374006	1	ST6GAL1,MGAT5
Reactome	Neg	PC2	M41838	Reactome signaling by rho gtpases miro gtpases and rhobtb3	13	707	273	25855	1.74143	0.0383382	1	PLXND1,ALDH3A2,CLASP1,PPP2R5C,ARHGEF7,LIMK1,SH3PXD2A,ARHGEF2,KLC1,CLIP1,ARHGAP24,FGD2,VAV2
Reactome	Neg	PC2	M27854	Reactome fatty acid metabolism	5	176	273	25855	2.69054	0.0393367	1	ALDH3A2,PRKAG2,CPT1A,SLC22A5,ACBD6
Reactome	Neg	PC2	M27941	Reactome foxo mediated transcription of oxidative stress metabolic and neuronal genes	2	30	273	25855	6.3138	0.0397986	1	GCK,FBXO32
Reactome	Neg	PC2	M1041	Reactome signaling by tgf beta receptor complex	3	73	273	25855	3.89207	0.0421797	1	PMEPA1,PARP1,PARD3
Reactome	Neg	PC2	M27400	Reactome disassembly of the destruction complex and recruitment of axin to the membrane	2	31	273	25855	6.11013	0.0422533	1	PPP2R5C,LRP5
Reactome	Neg	PC2	M27205	Reactome fceri mediated mapk activation	2	32	273	25855	5.91918	0.0447631	1	VAV2,SYK
Reactome	Neg	PC2	M27454	Reactome cardiac conduction	4	127	273	25855	2.9829	0.045941	1	ITPR1,ORAI2,STIM1,NPR1
Reactome	Neg	PC2	M27556	Reactome raf activation	2	34	273	25855	5.571	0.0499428	1	PPP2R5C,KSR1
Reactome	Neg	PC3	M1058	Reactome adaptive immune system	25	755	267	25887	3.21043	3.41303e-07	0.00054745	FYN,TYROBP,RNF4,PRKCQ,LGMN,ZBTB16,ITK,HERC2,RAP1GAP2,KLRD1,FBXO11,PPP3CA,ARF1,ITPR1,SH3RF1,PIK3AP1,PRKCB,FBXW8,MEX3C,SEC24C,KIR2DL4,ATG7,PLCG2,SH2D1B,CD247
Reactome	Neg	PC3	M1077	Reactome platelet activation signaling and aggregation	13	259	267	25887	4.86647	3.28301e-06	0.00263298	FYN,PRKCQ,DGKD,MAPK1,SCG3,ABCC4,VAV3,THBS1,ITPR1,CYRIB,PRKCB,GNG2,PLCG2
Reactome	Neg	PC3	M27171	Reactome dap12 signaling	5	29	267	25887	16.7164	1.09025e-05	0.00443521	FYN,TYROBP,VAV3,KLRD1,PLCG2
Reactome	Neg	PC3	M1036	Reactome innate immune system	27	1045	267	25887	2.50506	1.22824e-05	0.00443521	FGR,FYN,TYROBP,CD44,ATG5,PRKCQ,MAPK1,LGMN,RPS6KA5,ITK,ARSB,GNLY,CRACR2A,VAV3,KLRD1,PPP3CA,SLC15A4,ITPR1,LPCAT1,RAB31,PTAFR,RAB37,ATG7,PLCG2,CD247,CRCP,PLEKHO2
Reactome	Neg	PC3	M27206	Reactome fceri mediated ca 2 mobilization	5	31	267	25887	15.6379	1.53383e-05	0.00443521	ITK,VAV3,PPP3CA,ITPR1,PLCG2
Reactome	Neg	PC3	M27078	Reactome rho gtpase cycle	16	443	267	25887	3.50176	1.65906e-05	0.00443521	PLXND1,RHOBTB1,RASAL2,DOCK8,RAPGEF1,STK38,PREX1,VAV3,ARHGAP26,GFOD1,DLG5,SH3RF1,GARRE1,TPM4,AKAP13,ARAP1
Reactome	Neg	PC3	M27107	Reactome fcgamma receptor fcgr dependent phagocytosis	7	86	267	25887	7.89169	3.08007e-05	0.00705776	FGR,FYN,MAPK1,VAV3,ITPR1,PLCG2,CD247
Reactome	Neg	PC3	M29842	Reactome fcgr3a mediated il10 synthesis	5	38	267	25887	12.7572	4.27188e-05	0.00856512	FGR,FYN,ITPR1,PLCG2,CD247
Reactome	Neg	PC3	M41838	Reactome signaling by rho gtpases miro gtpases and rhobtb3	20	707	267	25887	2.74272	5.05118e-05	0.00883276	PLXND1,NUP133,RHOBTB1,CLASP1,RASAL2,MAPK1,DOCK8,RAPGEF1,STK38,PREX1,VAV3,ARHGAP26,GFOD1,DLG5,SH3RF1,GARRE1,PRKCB,TPM4,AKAP13,ARAP1
Reactome	Neg	PC3	M27151	Reactome dap12 interactions	5	40	267	25887	12.1194	5.50671e-05	0.00883276	FYN,TYROBP,VAV3,KLRD1,PLCG2
Reactome	Neg	PC3	M27175	Reactome fc epsilon receptor fceri signaling	8	131	267	25887	5.92092	6.68463e-05	0.0097474	FYN,PRKCQ,MAPK1,ITK,VAV3,PPP3CA,ITPR1,PLCG2
Reactome	Neg	PC3	M27584	Reactome homology directed repair	8	135	267	25887	5.74548	8.26201e-05	0.0110435	RFC2,RNF4,UIMC1,HERC2,BRIP1,BABAM2,SPIDR,RAD51B
Reactome	Neg	PC3	M11362	Reactome the role of nef in hiv 1 replication and disease pathogenesis	4	28	267	25887	13.8507	0.000186412	0.0218949	FYN,ARF1,PACS1,CD247
Reactome	Neg	PC3	M27108	Reactome fcgr activation	3	12	267	25887	24.2388	0.000222798	0.0218949	FGR,FYN,CD247
Reactome	Neg	PC3	M27159	Reactome notch2 intracellular domain regulates transcription	3	12	267	25887	24.2388	0.000222798	0.0218949	GZMB,RBPJ,MAML3
Reactome	Neg	PC3	M8395	Reactome hemostasis	17	613	267	25887	2.6888	0.000233966	0.0218949	FGR,FYN,CD44,PRKCQ,DGKD,MAPK1,SCG3,DOCK8,ABCC4,VAV3,THBS1,ITPR1,CYRIB,PRKCB,RAD51B,GNG2,PLCG2
Reactome	Neg	PC3	M601	Reactome antigen activates b cell receptor bcr leading to generation of second messengers	4	30	267	25887	12.9273	0.000245497	0.0218949	FYN,ITPR1,PIK3AP1,PLCG2
Reactome	Neg	PC3	M27381	Reactome interleukin 12 family signaling	5	55	267	25887	8.8141	0.00025669	0.0218949	IFNG,STAT4,ARF1,JAK1,IL23R
Reactome	Neg	PC3	M874	Reactome signaling by interleukins	14	449	267	25887	3.0231	0.000259354	0.0218949	FYN,MAPK1,RPS6KA5,RAPGEF1,IFNG,IL18R1,IL18RAP,FASLG,FOXO3,STAT4,ARF1,JAK1,IL23R,PTAFR
Reactome	Neg	PC3	M27582	Reactome dna double strand break repair	8	164	267	25887	4.72951	0.000315182	0.0252776	RFC2,RNF4,UIMC1,HERC2,BRIP1,BABAM2,SPIDR,RAD51B
Reactome	Neg	PC3	M29843	Reactome parasite infection	5	59	267	25887	8.21653	0.000357241	0.0264687	FGR,FYN,MAPK1,VAV3,CD247
Reactome	Neg	PC3	M27808	Reactome runx3 regulates notch signaling	3	14	267	25887	20.7761	0.000363037	0.0264687	RUNX3,RBPJ,MAML3
Reactome	Neg	PC3	M27590	Reactome processing of dna double strand break ends	6	95	267	25887	6.12348	0.000459316	0.0320323	RFC2,RNF4,UIMC1,HERC2,BRIP1,BABAM2
Reactome	Neg	PC3	M666	Reactome hyaluronan metabolism	3	17	267	25887	17.1097	0.000662846	0.0443002	CD44,CEMIP,HEXA
Reactome	Neg	PC3	M27547	Reactome diseases of signal transduction by growth factor receptors and second messengers	12	393	267	25887	2.96046	0.000847844	0.0543977	FYN,MAPK1,AXIN1,SHOC2,FOXO3,PIK3AP1,RBPJ,CTBP2,NCOR2,MAML3,SND1,ATG7
Reactome	Neg	PC3	M10959	Reactome other semaphorin interactions	3	19	267	25887	15.3087	0.000930261	0.05739	PLXND1,TYROBP,PLXNA4
Reactome	Neg	PC3	M608	Reactome signaling by the b cell receptor bcr	6	110	267	25887	5.28846	0.000995788	0.0582381	FYN,PPP3CA,ITPR1,PIK3AP1,PRKCB,PLCG2
Reactome	Neg	PC3	M27825	Reactome runx3 regulates bcl2l11 bim transcription	2	5	267	25887	38.782	0.00103832	0.0582381	RUNX3,FOXO3
Reactome	Neg	PC3	M1060	Reactome cytokine signaling in immune system	17	701	267	25887	2.35126	0.00105293	0.0582381	FYN,CD44,NUP133,MAPK1,RPS6KA5,RAPGEF1,IFNG,IL18R1,IL18RAP,TRIM62,FASLG,FOXO3,STAT4,ARF1,JAK1,IL23R,PTAFR
Reactome	Neg	PC3	M27894	Reactome interleukin 12 signaling	4	45	267	25887	8.61823	0.00118245	0.0632214	IFNG,STAT4,ARF1,JAK1
Reactome	Neg	PC3	M29836	Reactome leishmania infection	9	251	267	25887	3.47648	0.00125068	0.0647126	FGR,FYN,SCT,MAPK1,VAV3,ITPR1,GNG2,PLCG2,CD247
Reactome	Neg	PC3	M784	Reactome citric acid cycle tca cycle	3	22	267	25887	13.2211	0.00144504	0.0704816	ME2,ME3,SUCLG2
Reactome	Neg	PC3	M27620	Reactome neutrophil degranulation	13	478	267	25887	2.63685	0.0014923	0.0704816	FGR,TYROBP,CD44,MAPK1,ARSB,CRACR2A,SLC15A4,LPCAT1,RAB31,PTAFR,RAB37,ATG7,PLEKHO2
Reactome	Neg	PC3	M19806	Reactome post translational protein modification	27	1408	267	25887	1.85922	0.001494	0.0704816	ZRANB1,USP28,HIPK2,NUP133,UIMC1,AXIN1,SCG3,RAB2A,C1GALT1,ZBTB16,ARSB,NR5A2,HERC2,DAD1,DPH6,THBS1,FBXO11,ARF1,BABAM2,FBN1,MVD,RAB31,RAB37,FBXW8,SEC24C,NCOR2,ANKRD28
Reactome	Neg	PC3	M29840	Reactome anti inflammatory response favouring leishmania parasite infection	7	166	267	25887	4.08847	0.00173249	0.0793977	FGR,FYN,SCT,ITPR1,GNG2,PLCG2,CD247
Reactome	Neg	PC3	M27451	Reactome metabolism of lipids	17	737	267	25887	2.23641	0.00179299	0.0798876	AGPAT4,PITPNM2,ACOT7,LGMN,ARSB,ARF1,HSD17B12,MTMR12,LPCAT1,SAMD8,AGPAT3,MVD,SEC24C,GK2,NCOR2,SGMS1,HEXA
Reactome	Neg	PC3	M18437	Reactome g alpha q signalling events	8	216	267	25887	3.59093	0.00188581	0.0817526	PRKCQ,DGKD,MAPK1,XCL2,ITPR1,PTAFR,NMUR1,GNG2
Reactome	Neg	PC3	M7847	Reactome signaling by wnt	10	323	267	25887	3.0017	0.00203962	0.0845915	ZRANB1,RUNX3,AXIN1,PPP3CA,ITPR1,MOV10,PRKCB,CTBP2,GNG2,TCF4
Reactome	Neg	PC3	M27110	Reactome role of phospholipids in phagocytosis	3	25	267	25887	11.6346	0.00210951	0.0845915	ITPR1,PLCG2,CD247
Reactome	Neg	PC3	M27880	Reactome notch3 intracellular domain regulates transcription	3	25	267	25887	11.6346	0.00210951	0.0845915	PLXND1,RBPJ,MAML3
Reactome	Neg	PC3	M15434	Reactome dna repair	10	326	267	25887	2.97408	0.00218111	0.0853292	RFC2,RNF4,UIMC1,ELL,HERC2,BRIP1,BABAM2,USP1,SPIDR,RAD51B
Reactome	Neg	PC3	M5283	Reactome host interactions of hiv factors	6	130	267	25887	4.47485	0.00233832	0.0893015	FYN,NUP133,ARF1,PACS1,CD247,APOBEC3G
Reactome	Neg	PC3	M490	Reactome pyruvate metabolism and citric acid tca cycle	4	55	267	25887	7.05128	0.00249753	0.0905841	ME2,ME3,SUCLG2,D2HGDH
Reactome	Neg	PC3	M746	Reactome signaling by gpcr	16	696	267	25887	2.22885	0.00250791	0.0905841	PRKCQ,SCT,DGKD,MAPK1,PREX1,VAV3,PPP3CA,XCL2,ITPR1,PRKCB,CX3CR1,PTAFR,AKAP13,NMUR1,RGS6,GNG2
Reactome	Neg	PC3	M965	Reactome interferon gamma signaling	5	91	267	25887	5.3272	0.00254132	0.0905841	CD44,IFNG,TRIM62,JAK1,PTAFR
Reactome	Neg	PC3	M12123	Reactome effects of pip2 hydrolysis	3	27	267	25887	10.7728	0.00264232	0.0909555	PRKCQ,DGKD,ITPR1
Reactome	Neg	PC3	M1080	Reactome g2 m dna damage checkpoint	5	92	267	25887	5.2693	0.00266516	0.0909555	RFC2,UIMC1,HERC2,BRIP1,BABAM2
Reactome	Neg	PC3	M26997	Reactome nef and signal transduction	2	8	267	25887	24.2388	0.00284837	0.0915743	FYN,CD247
Reactome	Neg	PC3	M27878	Reactome interleukin 18 signaling	2	8	267	25887	24.2388	0.00284837	0.0915743	IL18R1,IL18RAP
Reactome	Neg	PC3	M27786	Reactome transcriptional regulation by runx1	8	231	267	25887	3.35775	0.00285456	0.0915743	ARID1B,HIPK2,PRKCQ,AXIN1,IFNG,THBS1,MOV10,PRKCB
Reactome	Neg	PC3	M6177	Reactome notch hlh transcription pathway	3	28	267	25887	10.388	0.00293702	0.0923723	RBPJ,NCOR2,MAML3
Reactome	Neg	PC3	M27548	Reactome infectious disease	18	857	267	25887	2.0364	0.0036171	0.108042	FGR,FYN,NUP133,SCT,MAPK1,ELL,DAD1,VAV3,ARF1,ITPR1,JAK1,RPL39L,PACS1,GNG2,NCOR2,PLCG2,CD247,APOBEC3G
Reactome	Neg	PC3	M26918	Reactome mapk1 erk2 activation	2	9	267	25887	21.5456	0.00363732	0.108042	MAPK1,JAK1
Reactome	Neg	PC3	M27896	Reactome interleukin 23 signaling	2	9	267	25887	21.5456	0.00363732	0.108042	STAT4,IL23R
Reactome	Neg	PC3	M27321	Reactome ca2 pathway	4	62	267	25887	6.25516	0.00386213	0.112634	PPP3CA,ITPR1,MOV10,GNG2
Reactome	Neg	PC3	M16523	Reactome generation of second messenger molecules	3	32	267	25887	9.08954	0.00431401	0.117691	ITK,PLCG2,CD247
Reactome	Neg	PC3	M27205	Reactome fceri mediated mapk activation	3	32	267	25887	9.08954	0.00431401	0.117691	MAPK1,VAV3,PLCG2
Reactome	Neg	PC3	M27900	Reactome regulation of mecp2 expression and activity	3	32	267	25887	9.08954	0.00431401	0.117691	HIPK2,MOV10,NCOR2
Reactome	Neg	PC3	M7923	Reactome semaphorin interactions	4	64	267	25887	6.05969	0.00432904	0.117691	PLXND1,FYN,TYROBP,PLXNA4
Reactome	Neg	PC3	M27898	Reactome interleukin 21 signaling	2	10	267	25887	19.391	0.0045158	0.120722	STAT4,JAK1
Reactome	Neg	PC3	M604	Reactome signaling by notch2	3	33	267	25887	8.8141	0.00470964	0.121843	GZMB,RBPJ,MAML3
Reactome	Neg	PC3	M41819	Reactome rhov gtpase cycle	3	33	267	25887	8.8141	0.00470964	0.121843	DLG5,SH3RF1,TPM4
Reactome	Neg	PC3	M27938	Reactome foxo mediated transcription	4	66	267	25887	5.87606	0.00483258	0.123039	FASLG,FOXO3,CCNG2,PLXNA4
Reactome	Neg	PC3	M27570	Reactome hdr through homologous recombination hrr	4	67	267	25887	5.78836	0.00509849	0.126506	RFC2,BRIP1,SPIDR,RAD51B
Reactome	Neg	PC3	M27583	Reactome resolution of d loop structures	3	34	267	25887	8.55486	0.00512648	0.126506	BRIP1,SPIDR,RAD51B
Reactome	Neg	PC3	M27466	Reactome clec7a dectin 1 induces nfat activation	2	11	267	25887	17.6282	0.00548189	0.133224	PPP3CA,ITPR1
Reactome	Neg	PC3	M773	Reactome gpvi mediated activation cascade	3	35	267	25887	8.31043	0.00556486	0.133224	FYN,VAV3,PLCG2
Reactome	Neg	PC3	M27820	Reactome gene and protein expression by jak stat signaling after interleukin 12 stimulation	3	37	267	25887	7.86122	0.00650735	0.147607	IFNG,STAT4,ARF1
Reactome	Neg	PC3	M660	Reactome hyaluronan uptake and degradation	2	12	267	25887	16.1592	0.00653371	0.147607	CD44,HEXA
Reactome	Neg	PC3	M27459	Reactome physiological factors	2	12	267	25887	16.1592	0.00653371	0.147607	HIPK2,NPPC
Reactome	Neg	PC3	M27860	Reactome interleukin 35 signalling	2	12	267	25887	16.1592	0.00653371	0.147607	STAT4,JAK1
Reactome	Neg	PC3	M653	Reactome synthesis of pa	3	38	267	25887	7.65435	0.007012	0.156212	AGPAT4,LPCAT1,AGPAT3
Reactome	Neg	PC3	M509	Reactome developmental biology	21	1132	267	25887	1.79864	0.00712085	0.156464	PLXND1,FYN,TYROBP,PRKCQ,CLASP1,ZNF638,MAPK1,RPS6KA5,NR5A2,FOXO3,VAV3,RPL39L,RBPJ,KRT74,EFNA5,KAZN,NCOR2,TCF4,MAML3,MBP,PLXNA4
Reactome	Neg	PC3	M734	Reactome rna polymerase ii transcription	24	1357	267	25887	1.71475	0.00732703	0.158818	RUNX3,PHF20,RFC2,ARID1B,HIPK2,PRKCQ,CPSF1,MAPK1,AXIN1,ELL,IFNG,NR5A2,FASLG,FOXO3,HIVEP3,BRIP1,THBS1,CCNG2,MOV10,PRKCB,RBPJ,NCOR2,MAML3,PLXNA4
Reactome	Neg	PC3	M26983	Reactome golgi cisternae pericentriolar stack reorganization	2	14	267	25887	13.8507	0.00888712	0.180442	MAPK1,RAB2A
Reactome	Neg	PC3	M622	Reactome prolonged erk activation events	2	14	267	25887	13.8507	0.00888712	0.180442	MAPK1,RAPGEF1
Reactome	Neg	PC3	M651	Reactome cs ds degradation	2	14	267	25887	13.8507	0.00888712	0.180442	ARSB,HEXA
Reactome	Neg	PC3	M7578	Reactome sema3a plexin repulsion signaling by inhibiting integrin adhesion	2	14	267	25887	13.8507	0.00888712	0.180442	FYN,PLXNA4
Reactome	Neg	PC3	M942	Reactome regulation of ifng signaling	2	14	267	25887	13.8507	0.00888712	0.180442	IFNG,JAK1
Reactome	Neg	PC3	M17541	Reactome regulation of beta cell development	3	42	267	25887	6.92536	0.00925874	0.183202	NR5A2,RBPJ,MAML3
Reactome	Neg	PC3	M27588	Reactome homologous dna pairing and strand exchange	3	42	267	25887	6.92536	0.00925874	0.183202	RFC2,BRIP1,RAD51B
Reactome	Neg	PC3	M695	Reactome glycosaminoglycan metabolism	5	124	267	25887	3.90948	0.00936569	0.183202	CD44,CEMIP,ARSB,CSGALNACT1,HEXA
Reactome	Neg	PC3	M800	Reactome g alpha 12 13 signalling events	4	80	267	25887	4.84775	0.00948442	0.183289	PREX1,VAV3,AKAP13,GNG2
Reactome	Neg	PC3	M27626	Reactome oncogenic mapk signaling	4	81	267	25887	4.7879	0.00989807	0.187288	MAPK1,SHOC2,SND1,ATG7
Reactome	Neg	PC3	M12469	Reactome hiv infection	7	229	267	25887	2.96369	0.00992488	0.187288	FYN,NUP133,ELL,ARF1,PACS1,CD247,APOBEC3G
Reactome	Neg	PC3	M16647	Reactome cell cycle checkpoints	8	289	267	25887	2.68388	0.0106024	0.196334	PHF20,RFC2,NUP133,CLASP1,UIMC1,HERC2,BRIP1,BABAM2
Reactome	Neg	PC3	M8240	Reactome immunoregulatory interactions between a lymphoid and a non lymphoid cell	5	128	267	25887	3.78731	0.0106491	0.196334	TYROBP,KLRD1,KIR2DL4,SH2D1B,CD247
Reactome	Neg	PC3	M724	Reactome response to elevated platelet cytosolic ca2	5	130	267	25887	3.72904	0.0113337	0.200255	SCG3,ABCC4,THBS1,CYRIB,PRKCB
Reactome	Neg	PC3	M27121	Reactome regulation of gene expression in late stage branching morphogenesis pancreatic bud precursor cells	2	16	267	25887	12.1194	0.0115615	0.200255	RBPJ,MAML3
Reactome	Neg	PC3	M16498	Reactome sema3a pak dependent axon repulsion	2	16	267	25887	12.1194	0.0115615	0.200255	FYN,PLXNA4
Reactome	Neg	PC3	M8245	Reactome crmps in sema3a signaling	2	16	267	25887	12.1194	0.0115615	0.200255	FYN,PLXNA4
Reactome	Neg	PC3	M27940	Reactome foxo mediated transcription of cell death genes	2	16	267	25887	12.1194	0.0115615	0.200255	FASLG,FOXO3
Reactome	Neg	PC3	M543	Reactome cell cycle	14	681	267	25887	1.9932	0.0116108	0.200255	PHF20,RFC2,NUP133,CLASP1,UIMC1,MAPK1,RAB2A,HERC2,BRIP1,EML4,MCPH1,BABAM2,PRKCB,ANKRD28
Reactome	Neg	PC3	M914	Reactome interleukin 3 interleukin 5 and gm csf signaling	3	46	267	25887	6.32316	0.0118799	0.202717	FYN,RAPGEF1,JAK1
Reactome	Neg	PC3	M10189	Reactome signaling by notch	7	238	267	25887	2.85162	0.0120785	0.203935	PLXND1,GZMB,MOV10,RBPJ,NCOR2,MAML3,MIR200B
Reactome	Neg	PC3	M41809	Reactome rac1 gtpase cycle	6	184	267	25887	3.16158	0.0123308	0.206028	DOCK8,PREX1,VAV3,ARHGAP26,GARRE1,ARAP1
Reactome	Neg	PC3	M27946	Reactome foxo mediated transcription of cell cycle genes	2	17	267	25887	11.4065	0.0130147	0.211762	FOXO3,CCNG2
Reactome	Neg	PC3	M41810	Reactome rac2 gtpase cycle	4	88	267	25887	4.40705	0.0131229	0.211762	PREX1,VAV3,ARHGAP26,GARRE1
Reactome	Neg	PC3	M27660	Reactome mitotic prophase	5	135	267	25887	3.59093	0.0131753	0.211762	NUP133,MAPK1,RAB2A,MCPH1,PRKCB
Reactome	Neg	PC3	M611	Reactome notch1 intracellular domain regulates transcription	3	48	267	25887	6.05969	0.0133341	0.211762	RBPJ,NCOR2,MAML3
Reactome	Neg	PC3	M10775	Reactome g alpha z signalling events	3	48	267	25887	6.05969	0.0133341	0.211762	PRKCQ,PRKCB,GNG2
Reactome	Neg	PC3	M618	Reactome signaling by notch3	3	49	267	25887	5.93602	0.0140976	0.218288	PLXND1,RBPJ,MAML3
Reactome	Neg	PC3	M6467	Reactome opioid signalling	4	90	267	25887	4.30911	0.0141533	0.218288	MAPK1,PPP3CA,ITPR1,GNG2
Reactome	Neg	PC3	M14857	Reactome sphingolipid metabolism	4	90	267	25887	4.30911	0.0141533	0.218288	ARSB,SAMD8,SGMS1,HEXA
Reactome	Neg	PC3	M1070	Reactome antigen processing ubiquitination proteasome degradation	8	307	267	25887	2.52652	0.0147971	0.225246	RNF4,ZBTB16,HERC2,FBXO11,SH3RF1,FBXW8,MEX3C,ATG7
Reactome	Neg	PC3	M678	Reactome chondroitin sulfate dermatan sulfate metabolism	3	50	267	25887	5.8173	0.0148854	0.225246	ARSB,CSGALNACT1,HEXA
Reactome	Neg	PC3	M27484	Reactome c type lectin receptors clrs	5	140	267	25887	3.46268	0.0152089	0.227992	FYN,RPS6KA5,PPP3CA,ITPR1,PLCG2
Reactome	Neg	PC3	M27311	Reactome eph ephrin mediated repulsion of cells	3	51	267	25887	5.70324	0.0156976	0.233138	FYN,VAV3,EFNA5
Reactome	Neg	PC3	M27423	Reactome vegfr2 mediated cell proliferation	2	19	267	25887	10.2058	0.0161443	0.237573	ITPR1,PRKCB
Reactome	Neg	PC3	M41818	Reactome rac3 gtpase cycle	4	94	267	25887	4.12575	0.0163646	0.238626	RAPGEF1,PREX1,ARHGAP26,GARRE1
Reactome	Neg	PC3	M1066	Reactome class i mhc mediated antigen processing presentation	9	376	267	25887	2.32073	0.0166262	0.240256	RNF4,ZBTB16,HERC2,FBXO11,SH3RF1,FBXW8,MEX3C,SEC24C,ATG7
Reactome	Neg	PC3	M29853	Reactome nervous system development	12	578	267	25887	2.01291	0.0174757	0.247707	PLXND1,FYN,TYROBP,PRKCQ,CLASP1,MAPK1,RPS6KA5,VAV3,RPL39L,EFNA5,MBP,PLXNA4
Reactome	Neg	PC3	M27784	Reactome transcriptional regulation by runx3	4	96	267	25887	4.03979	0.0175469	0.247707	RUNX3,FOXO3,RBPJ,MAML3
Reactome	Neg	PC3	M27881	Reactome notch4 intracellular domain regulates transcription	2	20	267	25887	9.69551	0.0178174	0.247707	RBPJ,MAML3
Reactome	Neg	PC3	M983	Reactome interferon signaling	6	200	267	25887	2.90865	0.0179003	0.247707	CD44,NUP133,IFNG,TRIM62,JAK1,PTAFR
Reactome	Neg	PC3	M27288	Reactome beta catenin independent wnt signaling	5	146	267	25887	3.32038	0.017914	0.247707	PPP3CA,ITPR1,MOV10,PRKCB,GNG2
Reactome	Neg	PC3	M41815	Reactome rhoj gtpase cycle	3	55	267	25887	5.28846	0.0191922	0.259299	DOCK8,PREX1,ARHGAP26
Reactome	Neg	PC3	M41805	Reactome rhoa gtpase cycle	5	149	267	25887	3.25353	0.0193784	0.259299	PREX1,VAV3,ARHGAP26,AKAP13,ARAP1
Reactome	Neg	PC3	M27565	Reactome mapk family signaling cascades	8	323	267	25887	2.40136	0.0194401	0.259299	FYN,PRKCQ,RASAL2,MAPK1,SHOC2,FOXO3,MOV10,JAK1
Reactome	Neg	PC3	M12347	Reactome nef mediates down modulation of cell surface receptors by recruiting them to clathrin adapters	2	21	267	25887	9.23381	0.0195606	0.259299	ARF1,PACS1
Reactome	Neg	PC3	M27485	Reactome cd209 dc sign signaling	2	21	267	25887	9.23381	0.0195606	0.259299	FYN,RPS6KA5
Reactome	Neg	PC3	M13408	Reactome erk mapk targets	2	22	267	25887	8.8141	0.0213722	0.276459	MAPK1,RPS6KA5
Reactome	Neg	PC3	M41722	Reactome deregulated cdk5 triggers multiple neurodegenerative pathways in alzheimer s disease models	2	22	267	25887	8.8141	0.0213722	0.276459	FASLG,FOXO3
Reactome	Neg	PC3	M903	Reactome regulation of signaling by cbl	2	22	267	25887	8.8141	0.0213722	0.276459	FYN,RAPGEF1
Reactome	Neg	PC3	M29616	Reactome signaling by notch1 pest domain mutants in cancer	3	58	267	25887	5.01492	0.0220724	0.281894	RBPJ,NCOR2,MAML3
Reactome	Neg	PC3	M649	Reactome phospholipid metabolism	6	210	267	25887	2.77014	0.0221438	0.281894	AGPAT4,PITPNM2,ARF1,MTMR12,LPCAT1,AGPAT3
Reactome	Neg	PC3	M11215	Reactome nrage signals death through jnk	3	59	267	25887	4.92992	0.0230819	0.284686	PREX1,VAV3,AKAP13
Reactome	Neg	PC3	M41812	Reactome rhoq gtpase cycle	3	59	267	25887	4.92992	0.0230819	0.284686	PREX1,ARHGAP26,GFOD1
Reactome	Neg	PC3	M26917	Reactome raf independent mapk1 3 activation	2	23	267	25887	8.43087	0.0232505	0.284686	MAPK1,JAK1
Reactome	Neg	PC3	M913	Reactome nephrin family interactions	2	23	267	25887	8.43087	0.0232505	0.284686	FYN,KIRREL3
Reactome	Neg	PC3	M41817	Reactome rhobtb1 gtpase cycle	2	23	267	25887	8.43087	0.0232505	0.284686	RHOBTB1,STK38
Reactome	Neg	PC3	M27794	Reactome esr mediated signaling	6	213	267	25887	2.73113	0.0235385	0.286028	MAPK1,AXIN1,NR5A2,FOXO3,MOV10,GNG2
Reactome	Neg	PC3	M27077	Reactome signaling by vegf	4	106	267	25887	3.65868	0.0242486	0.292442	FYN,VAV3,ITPR1,PRKCB
Reactome	Neg	PC3	M41808	Reactome cdc42 gtpase cycle	5	159	267	25887	3.0489	0.0248198	0.297097	DOCK8,PREX1,VAV3,ARHGAP26,ARAP1
Reactome	Neg	PC3	M27553	Reactome rho gtpases activate nadph oxidases	2	24	267	25887	8.07959	0.0251942	0.297143	MAPK1,PRKCB
Reactome	Neg	PC3	M27952	Reactome estrogen dependent nuclear events downstream of esr membrane signaling	2	24	267	25887	8.07959	0.0251942	0.297143	MAPK1,FOXO3
Reactome	Neg	PC3	M27609	Reactome interleukin 4 and interleukin 13 signaling	4	108	267	25887	3.59093	0.0257505	0.301487	FASLG,FOXO3,JAK1,IL23R
Reactome	Neg	PC3	M27865	Reactome signaling by erythropoietin	2	25	267	25887	7.7564	0.0272015	0.313551	RAPGEF1,PLCG2
Reactome	Neg	PC3	M11187	Reactome ncam signaling for neurite out growth	3	63	267	25887	4.61691	0.0273673	0.313551	FYN,MAPK1,RPS6KA5
Reactome	Neg	PC3	M27862	Reactome transcriptional regulation by mecp2	3	63	267	25887	4.61691	0.0273673	0.313551	HIPK2,MOV10,NCOR2
Reactome	Neg	PC3	M607	Reactome pre notch expression and processing	4	111	267	25887	3.49388	0.0281061	0.317594	MOV10,RBPJ,MAML3,MIR200B
Reactome	Neg	PC3	M38994	Reactome signaling by braf and raf fusions	3	64	267	25887	4.54477	0.0285003	0.317594	MAPK1,SND1,ATG7
Reactome	Neg	PC3	M27771	Reactome rab geranylgeranylation	3	64	267	25887	4.54477	0.0285003	0.317594	RAB2A,RAB31,RAB37
Reactome	Neg	PC3	M19381	Reactome g2 m checkpoints	5	165	267	25887	2.93803	0.0285122	0.317594	RFC2,UIMC1,HERC2,BRIP1,BABAM2
Reactome	Neg	PC3	M27483	Reactome dectin 2 family	2	26	267	25887	7.45808	0.0292711	0.319394	FYN,PLCG2
Reactome	Neg	PC3	M27586	Reactome resolution of d loop structures through synthesis dependent strand annealing sdsa	2	26	267	25887	7.45808	0.0292711	0.319394	BRIP1,RAD51B
Reactome	Neg	PC3	M27750	Reactome interleukin 20 family signaling	2	26	267	25887	7.45808	0.0292711	0.319394	STAT4,JAK1
Reactome	Neg	PC3	M27587	Reactome nonhomologous end joining nhej	3	66	267	25887	4.40705	0.0308401	0.333208	UIMC1,HERC2,BABAM2
Reactome	Neg	PC3	M27869	Reactome signaling by nuclear receptors	7	289	267	25887	2.34839	0.0309526	0.333208	MAPK1,AXIN1,NR5A2,FOXO3,MOV10,GNG2,NCOR2
Reactome	Neg	PC3	M15381	Reactome tcr signaling	4	117	267	25887	3.3147	0.0331911	0.354924	PRKCQ,ITK,PLCG2,CD247
Reactome	Neg	PC3	M41806	Reactome rhob gtpase cycle	3	70	267	25887	4.15522	0.0358128	0.378189	PREX1,ARHGAP26,AKAP13
Reactome	Neg	PC3	M27309	Reactome epha mediated growth cone collapse	2	29	267	25887	6.68656	0.0358384	0.378189	FYN,EFNA5
Reactome	Neg	PC3	M27870	Reactome signaling by receptor tyrosine kinases	10	504	267	25887	1.92371	0.0372219	0.390222	MATK,FYN,MAPK1,RPS6KA5,ADAP1,RAPGEF1,VAV3,THBS1,ITPR1,PRKCB
Reactome	Neg	PC3	M26898	Reactome recognition of dna damage by pcna containing replication complex	2	30	267	25887	6.46367	0.0381422	0.39218	RFC2,USP1
Reactome	Neg	PC3	M18193	Reactome activation of kainate receptors upon glutamate binding	2	30	267	25887	6.46367	0.0381422	0.39218	GRIK4,GNG2
Reactome	Neg	PC3	M27941	Reactome foxo mediated transcription of oxidative stress metabolic and neuronal genes	2	30	267	25887	6.46367	0.0381422	0.39218	FOXO3,PLXNA4
Reactome	Neg	PC3	M41807	Reactome rhoc gtpase cycle	3	73	267	25887	3.98445	0.0397963	0.406582	PREX1,ARHGAP26,AKAP13
Reactome	Neg	PC3	M15195	Reactome mapk targets nuclear events mediated by map kinases	2	31	267	25887	6.25516	0.040501	0.411162	MAPK1,RPS6KA5
Reactome	Neg	PC3	M616	Reactome signaling by notch1	3	74	267	25887	3.93061	0.0411721	0.41275	RBPJ,NCOR2,MAML3
Reactome	Neg	PC3	M41814	Reactome rhog gtpase cycle	3	74	267	25887	3.93061	0.0411721	0.41275	PREX1,VAV3,GARRE1
Reactome	Neg	PC3	M27214	Reactome sumoylation	5	184	267	25887	2.63465	0.0424174	0.414658	HIPK2,NUP133,NR5A2,HERC2,NCOR2
Reactome	Neg	PC3	M27589	Reactome dna double strand break response	3	75	267	25887	3.8782	0.0425715	0.414658	UIMC1,HERC2,BABAM2
Reactome	Neg	PC3	M27874	Reactome extra nuclear estrogen signaling	3	75	267	25887	3.8782	0.0425715	0.414658	MAPK1,FOXO3,GNG2
Reactome	Neg	PC3	M706	Reactome glycerophospholipid biosynthesis	4	127	267	25887	3.0537	0.0427852	0.414658	AGPAT4,PITPNM2,LPCAT1,AGPAT3
Reactome	Neg	PC3	M27454	Reactome cardiac conduction	4	127	267	25887	3.0537	0.0427852	0.414658	HIPK2,ITPR1,NPPC,KCNE1
Reactome	Neg	PC3	M861	Reactome thrombin signalling through proteinase activated receptors pars	2	32	267	25887	6.05969	0.0429135	0.414658	MAPK1,GNG2
Reactome	Neg	PC3	M19832	Reactome cell death signalling via nrage nrif and nade	3	76	267	25887	3.82717	0.0439946	0.422559	PREX1,VAV3,AKAP13
Reactome	Neg	PC3	M600	Reactome g alpha i signalling events	7	314	267	25887	2.16142	0.0450595	0.430211	MAPK1,PPP3CA,ITPR1,CX3CR1,NMUR1,RGS6,GNG2
Reactome	Neg	PC3	M10322	Reactome glucagon type ligand receptors	2	33	267	25887	5.87606	0.0453782	0.43069	SCT,GNG2
Reactome	Neg	PC3	M522	Reactome cell cell communication	4	130	267	25887	2.98323	0.0459372	0.433431	FYN,TYROBP,CDH17,KIRREL3
Reactome	Neg	PC3	M13881	Reactome signalling to erks	2	34	267	25887	5.70324	0.047894	0.44282	MAPK1,RAPGEF1
Reactome	Neg	PC3	M27183	Reactome the phototransduction cascade	2	34	267	25887	5.70324	0.047894	0.44282	PRKCQ,SAG
Reactome	Neg	PC3	M27405	Reactome signaling by wnt in cancer	2	34	267	25887	5.70324	0.047894	0.44282	AXIN1,CTBP2
KEGG	Pos	PC1	M9904	Kegg t cell receptor signaling pathway	16	108	243	26199	15.9726	4.35722e-15	8.10443e-13	ZAP70,NFKB1,PIK3R5,CD247,NCK2,NFATC2,LCK,RASGRP1,PDCD1,PRKCQ,PTPRC,MAPK1,ITK,LAT,FYN,PIK3R1
KEGG	Pos	PC1	M5669	Kegg natural killer cell mediated cytotoxicity	11	132	243	26199	8.98457	4.49848e-08	4.18359e-06	ZAP70,PIK3R5,CD247,NFATC2,LCK,MAPK1,CD48,LAT,FASLG,FYN,PIK3R1
KEGG	Pos	PC1	M16763	Kegg neurotrophin signaling pathway	10	126	243	26199	8.55673	2.94439e-07	1.82552e-05	NFKB1,PIK3R5,BCL2,YWHAZ,MAP2K5,RPS6KA2,KIDINS220,MAPK1,FASLG,PIK3R1
KEGG	Pos	PC1	M7561	Kegg mtor signaling pathway	6	52	243	26199	12.4402	8.52782e-06	0.000396543	HIF1A,RPTOR,RPS6KA2,MAPK1,PIK3R5,PIK3R1
KEGG	Pos	PC1	M19888	Kegg acute myeloid leukemia	6	57	243	26199	11.3489	1.46238e-05	0.000544007	TCF7,NFKB1,MAPK1,RUNX1,PIK3R5,PIK3R1
KEGG	Pos	PC1	M13191	Kegg prostate cancer	7	89	243	26199	8.47982	1.95524e-05	0.000606125	E2F1,TCF7,NFKB1,MAPK1,PIK3R5,BCL2,PIK3R1
KEGG	Pos	PC1	M321	Kegg chronic myeloid leukemia	6	73	243	26199	8.86149	6.06272e-05	0.00141509	E2F1,NFKB1,MAPK1,RUNX1,PIK3R5,PIK3R1
KEGG	Pos	PC1	M11079	Kegg n glycan biosynthesis	5	46	243	26199	11.719	6.62111e-05	0.00141509	MAN1B1,DAD1,MAN1C1,MGAT4A,ST6GAL1
KEGG	Pos	PC1	M5436	Kegg b cell receptor signaling pathway	6	75	243	26199	8.62519	7.0616e-05	0.00141509	NFKB1,MAPK1,PIK3R5,IFITM1,NFATC2,PIK3R1
KEGG	Pos	PC1	M9052	Kegg phosphatidylinositol signaling system	6	76	243	26199	8.5117	7.60799e-05	0.00141509	DGKD,INPP4A,PIK3R5,ITPKB,PIP4K2A,PIK3R1
KEGG	Pos	PC1	M8492	Kegg apoptosis	6	86	243	26199	7.52196	0.000151482	0.00256143	ATM,NFKB1,PIK3R5,BCL2,FASLG,PIK3R1
KEGG	Pos	PC1	M12868	Kegg pathways in cancer	11	324	243	26199	3.66038	0.00023925	0.0036814	HIF1A,NFKB1,PIK3R5,ETS1,RUNX1,BCL2,E2F1,TCF7,MAPK1,FASLG,PIK3R1
KEGG	Pos	PC1	M16121	Kegg fc gamma r mediated phagocytosis	6	96	243	26199	6.73843	0.000276576	0.0036814	AMPH,PIK3R5,PTPRC,MAPK1,LAT,PIK3R1
KEGG	Pos	PC1	M14631	Kegg colorectal cancer	5	62	243	26199	8.69474	0.000277095	0.0036814	TCF7,MAPK1,PIK3R5,BCL2,PIK3R1
KEGG	Pos	PC1	M4085	Kegg primary immunodeficiency	4	35	243	26199	12.3217	0.000301576	0.00373954	ZAP70,TAP1,LCK,PTPRC
KEGG	Pos	PC1	M13266	Kegg renal cell carcinoma	5	70	243	26199	7.70106	0.000488044	0.00533977	HIF1A,ETS1,MAPK1,PIK3R5,PIK3R1
KEGG	Pos	PC1	M9726	Kegg pancreatic cancer	5	70	243	26199	7.70106	0.000488044	0.00533977	E2F1,NFKB1,MAPK1,PIK3R5,PIK3R1
KEGG	Pos	PC1	M17411	Kegg jak stat signaling pathway	7	151	243	26199	4.99804	0.00053884	0.00553645	IL21R,PIK3R5,PRLR,CCND3,IL12RB2,IL19,PIK3R1
KEGG	Pos	PC1	M7253	Kegg focal adhesion	8	199	243	26199	4.33426	0.000565552	0.00553645	PIK3R5,ACTN1,ITGA9,BCL2,CCND3,MAPK1,FYN,PIK3R1
KEGG	Pos	PC1	M11816	Kegg fc epsilon ri signaling pathway	5	79	243	26199	6.82372	0.000849516	0.00780188	MAPK1,PIK3R5,LAT,FYN,PIK3R1
KEGG	Pos	PC1	M18306	Kegg regulation of actin cytoskeleton	8	213	243	26199	4.04938	0.000880857	0.00780188	PIK3R5,MYH9,ACTN1,PIP4K2A,ITGA9,GNA13,MAPK1,PIK3R1
KEGG	Pos	PC1	M3228	Kegg small cell lung cancer	5	84	243	26199	6.41755	0.00112093	0.00947693	E2F1,NFKB1,PIK3R5,BCL2,PIK3R1
KEGG	Pos	PC1	M3578	Kegg progesterone mediated oocyte maturation	5	85	243	26199	6.34205	0.00118211	0.00955967	RPS6KA2,MAPK1,PIK3R5,CDC25B,PIK3R1
KEGG	Pos	PC1	M19877	Kegg endometrial cancer	4	52	243	26199	8.29345	0.00137861	0.0106842	TCF7,MAPK1,PIK3R5,PIK3R1
KEGG	Pos	PC1	M19818	Kegg non small cell lung cancer	4	54	243	26199	7.98628	0.00158734	0.0118098	E2F1,MAPK1,PIK3R5,PIK3R1
KEGG	Pos	PC1	M4844	Kegg chemokine signaling pathway	7	188	243	26199	4.01438	0.00192752	0.0137892	NFKB1,PIK3R5,CXCR6,CCR7,MAPK1,ITK,PIK3R1
KEGG	Pos	PC1	M9809	Kegg cytokine cytokine receptor interaction	8	259	243	26199	3.33019	0.00300438	0.0206968	IL21R,PRLR,CXCR6,IL19,LTA,IL12RB2,CCR7,FASLG
KEGG	Pos	PC1	M1835	Kegg glioma	4	65	243	26199	6.63476	0.00313917	0.020853	E2F1,MAPK1,PIK3R5,PIK3R1
KEGG	Pos	PC1	M10792	Kegg mapk signaling pathway	8	267	243	26199	3.23041	0.00361143	0.023163	NFKB1,NFATC2,MAP2K5,RPS6KA2,CDC25B,RASGRP1,MAPK1,FASLG
KEGG	Pos	PC1	M15798	Kegg melanoma	4	71	243	26199	6.07407	0.00431488	0.0265363	E2F1,MAPK1,PIK3R5,PIK3R1
KEGG	Pos	PC1	M2164	Kegg leukocyte transendothelial migration	5	115	243	26199	4.6876	0.00442272	0.0265363	TXK,PIK3R5,ACTN1,ITK,PIK3R1
KEGG	Pos	PC1	M638	Kegg adherens junction	4	73	243	26199	5.90766	0.00476463	0.0276944	ACTN1,TCF7,MAPK1,FYN
KEGG	Pos	PC1	M1749	Kegg vegf signaling pathway	4	76	243	26199	5.67446	0.00549666	0.0309812	MAPK1,PIK3R5,NFATC2,PIK3R1
KEGG	Pos	PC1	M7963	Kegg cell cycle	5	125	243	26199	4.31259	0.00627519	0.034329	ATM,CDC25B,YWHAZ,CCND3,E2F1
KEGG	Pos	PC1	M12617	Kegg type i diabetes mellitus	3	41	243	26199	7.88889	0.00647935	0.0344331	LTA,ICA1,FASLG
KEGG	Pos	PC1	M16473	Kegg aldosterone regulated sodium reabsorption	3	42	243	26199	7.70106	0.00693063	0.0358083	PIK3R5,PIK3R1,MAPK1
KEGG	Pos	PC1	M12467	Kegg erbb signaling pathway	4	87	243	26199	4.957	0.00881427	0.0443096	MAPK1,PIK3R5,NCK2,PIK3R1
KEGG	Pos	PC1	M19708	Kegg type ii diabetes mellitus	3	47	243	26199	6.8818	0.00946347	0.0463212	PIK3R5,PIK3R1,MAPK1
KEGG	Pos	PC1	M3896	Kegg inositol phosphate metabolism	3	54	243	26199	5.98971	0.0138082	0.0658546	INPP4A,ITPKB,PIP4K2A
KEGG	Pos	PC1	M3261	Kegg toll like receptor signaling pathway	4	102	243	26199	4.22803	0.0151214	0.0690699	NFKB1,PIK3R5,MAPK1,PIK3R1
KEGG	Pos	PC1	M2333	Kegg pathogenic escherichia coli infection	3	56	243	26199	5.77579	0.0152251	0.0690699	NCK2,YWHAZ,FYN
KEGG	Pos	PC1	M11190	Kegg dorso ventral axis formation	2	24	243	26199	8.98457	0.0206759	0.0915646	ETS1,MAPK1
KEGG	Pos	PC1	M16817	Kegg oocyte meiosis	4	113	243	26199	3.81645	0.0211907	0.091662	YWHAZ,RPS6KA2,MAPK1,PPP2R5C
KEGG	Pos	PC1	M9387	Kegg vascular smooth muscle contraction	4	115	243	26199	3.75008	0.0224327	0.0948291	GNA13,PRKCH,PRKCQ,MAPK1
KEGG	Pos	PC1	M12524	Kegg histidine metabolism	2	29	243	26199	7.4355	0.0295097	0.119322	HEMK1,HDC
KEGG	Pos	PC1	M523	Kegg thyroid cancer	2	29	243	26199	7.4355	0.0295097	0.119322	TCF7,MAPK1
KEGG	Pos	PC1	M16376	Kegg arrhythmogenic right ventricular cardiomyopathy arvc	3	74	243	26199	4.37087	0.0315583	0.12489	ITGA9,ACTN1,TCF7
KEGG	Pos	PC1	M5539	Kegg axon guidance	4	129	243	26199	3.3431	0.0323612	0.1254	NCK2,NFATC2,MAPK1,FYN
KEGG	Pos	PC1	M11355	Kegg tight junction	4	132	243	26199	3.26712	0.0347742	0.132	MYH9,ACTN1,PRKCH,PRKCQ
KEGG	Pos	PC1	M18155	Kegg insulin signaling pathway	4	137	243	26199	3.14788	0.0390224	0.144586	PIK3R5,RPTOR,MAPK1,PIK3R1
KEGG	Pos	PC1	M16004	Kegg antigen processing and presentation	3	81	243	26199	3.99314	0.0396444	0.144586	LTA,TAP1,B2M
KEGG	Pos	PC1	M13036	Kegg prion diseases	2	35	243	26199	6.16085	0.0417143	0.149209	FYN,MAPK1
KEGG	Pos	PC2	M2164	Kegg leukocyte transendothelial migration	8	115	287	26158	6.34037	4.08567e-05	0.00759934	TXK,ITGB2,PXN,PTK2B,ACTN4,ARHGAP35,ITK,RASSF5
KEGG	Pos	PC2	M9904	Kegg t cell receptor signaling pathway	7	108	287	26158	5.90741	0.0001929	0.0179397	CD247,NCK2,LCK,PRKCQ,PTPRC,ITK,FYN
KEGG	Pos	PC2	M1519	Kegg endocytosis	8	181	287	26158	4.02841	0.000907453	0.0538582	MVB12B,SMAP2,STAM,DNM2,CXCR1,PSD3,SH3KBP1,GRK6
KEGG	Pos	PC2	M4844	Kegg chemokine signaling pathway	8	188	287	26158	3.87842	0.00115824	0.0538582	TIAM1,STAT5B,ADCY3,PXN,PTK2B,CXCR1,ITK,GRK6
KEGG	Pos	PC2	M19166	Kegg glycosaminoglycan biosynthesis chondroitin sulfate	3	22	287	26158	12.4286	0.00172462	0.064156	CHSY1,CHST11,CSGALNACT1
KEGG	Pos	PC2	M18306	Kegg regulation of actin cytoskeleton	8	213	287	26158	3.42321	0.00253535	0.0723826	DIAPH1,TIAM1,ACTN4,PIP4K2A,ITGB2,PXN,SSH3,ARHGAP35
KEGG	Pos	PC2	M3812	Kegg amyotrophic lateral sclerosis als	4	53	287	26158	6.87871	0.00272408	0.0723826	TNFRSF1B,CASP1,TNFRSF1A,BCL2
KEGG	Pos	PC2	M5669	Kegg natural killer cell mediated cytotoxicity	6	132	287	26158	4.14286	0.00342309	0.0795869	ITGB2,CD247,PTK2B,LCK,FASLG,FYN
KEGG	Pos	PC2	M11521	Kegg glycolysis gluconeogenesis	4	62	287	26158	5.88018	0.00480594	0.0993228	ACSS2,HK2,PKM,LDHC
KEGG	Pos	PC2	M7253	Kegg focal adhesion	7	199	287	26158	3.20603	0.00658772	0.122532	DIAPH1,VWF,ACTN4,PXN,BCL2,ARHGAP35,FYN
KEGG	Pos	PC2	M14314	Kegg purine metabolism	6	159	287	26158	3.43935	0.00836192	0.131704	PDE4D,ADCY3,PDE8A,PDE9A,PNP,PKM
KEGG	Pos	PC2	M7934	Kegg pyruvate metabolism	3	40	287	26158	6.83571	0.00957076	0.131704	ACSS2,LDHC,PKM
KEGG	Pos	PC2	M9052	Kegg phosphatidylinositol signaling system	4	76	287	26158	4.79699	0.0098139	0.131704	INPP4A,SYNJ2,DGKA,PIP4K2A
KEGG	Pos	PC2	M12868	Kegg pathways in cancer	9	324	287	26158	2.53175	0.00991318	0.131704	STAT5B,TGFBR2,ETS1,RUNX1,RASSF5,BCL2,ZBTB16,TGFA,FASLG
KEGG	Pos	PC2	M3896	Kegg inositol phosphate metabolism	3	54	287	26158	5.06349	0.0214865	0.266433	INPP4A,SYNJ2,PIP4K2A
KEGG	Pos	PC2	M19888	Kegg acute myeloid leukemia	3	57	287	26158	4.79699	0.0247496	0.287714	ZBTB16,STAT5B,RUNX1
KEGG	Pos	PC2	M10462	Kegg adipocytokine signaling pathway	3	67	287	26158	4.08102	0.0374373	0.409608	PRKCQ,TNFRSF1B,TNFRSF1A
KEGG	Pos	PC2	M638	Kegg adherens junction	3	73	287	26158	3.7456	0.0463622	0.445939	ACTN4,TGFBR2,FYN
KEGG	Pos	PC2	M321	Kegg chronic myeloid leukemia	3	73	287	26158	3.7456	0.0463622	0.445939	STAT5B,RUNX1,TGFBR2
KEGG	Pos	PC2	M4086	Kegg propanoate metabolism	2	32	287	26158	5.69643	0.0479504	0.445939	ACSS2,LDHC
KEGG	Pos	PC3	M9904	Kegg t cell receptor signaling pathway	15	108	237	26198	15.3528	5.92178e-14	1.10145e-11	MALT1,CD28,ICOS,NFKB1,CTLA4,CD3D,CD3E,CD3G,PLCG1,NFATC1,RASGRP1,PTPN6,GRAP2,CBL,LAT
KEGG	Pos	PC3	M6856	Kegg hematopoietic cell lineage	7	82	237	26198	9.43635	9.6935e-06	0.000901495	IL6R,CD2,CD3D,CD3E,CD3G,CD1C,IL4R
KEGG	Pos	PC3	M16476	Kegg cell adhesion molecules cams	8	130	237	26198	6.80247	2.50847e-05	0.00155525	CD28,ICOS,CTLA4,CD6,HLA-E,NRXN2,CD2,CD226
KEGG	Pos	PC3	M638	Kegg adherens junction	6	73	237	26198	9.08549	5.27984e-05	0.00245512	LEF1,PTPN6,ACTN1,SMAD3,TCF7,TGFBR2
KEGG	Pos	PC3	M12868	Kegg pathways in cancer	11	324	237	26198	3.7529	0.000192891	0.00717555	LEF1,AXIN2,NFKB1,TPM3,TGFBR2,PLCG1,RARA,SMAD3,ETS1,CBL,TCF7
KEGG	Pos	PC3	M14631	Kegg colorectal cancer	5	62	237	26198	8.91452	0.00024698	0.00765638	LEF1,AXIN2,SMAD3,TCF7,TGFBR2
KEGG	Pos	PC3	M13103	Kegg autoimmune thyroid disease	4	50	237	26198	8.84321	0.00108512	0.0288332	CD28,TG,CTLA4,HLA-E
KEGG	Pos	PC3	M19888	Kegg acute myeloid leukemia	4	57	237	26198	7.7572	0.00177165	0.041191	RARA,LEF1,TCF7,NFKB1
KEGG	Pos	PC3	M523	Kegg thyroid cancer	3	29	237	26198	11.4352	0.00224513	0.0463993	LEF1,TCF7,TPM3
KEGG	Pos	PC3	M17411	Kegg jak stat signaling pathway	6	151	237	26198	4.39232	0.00257744	0.0479404	IL23A,PTPN6,CBL,IL6R,IL6ST,IL4R
KEGG	Pos	PC3	M4085	Kegg primary immunodeficiency	3	35	237	26198	9.47486	0.00386438	0.0653432	ICOS,CD3D,CD3E
KEGG	Pos	PC3	M321	Kegg chronic myeloid leukemia	4	73	237	26198	6.05699	0.00436312	0.0676284	SMAD3,NFKB1,CBL,TGFBR2
KEGG	Pos	PC3	M5436	Kegg b cell receptor signaling pathway	4	75	237	26198	5.89547	0.00480456	0.0687422	MALT1,PTPN6,NFKB1,NFATC1
KEGG	Pos	PC3	M9131	Kegg glycerophospholipid metabolism	4	77	237	26198	5.74234	0.00527505	0.0700828	PLA2G6,PGS1,DGKA,AGPAT1
KEGG	Pos	PC3	M1519	Kegg endocytosis	6	181	237	26198	3.66431	0.00622544	0.0771954	EEA1,SMURF1,HLA-E,CHMP4B,LDLRAP1,CBL
KEGG	Pos	PC3	M5669	Kegg natural killer cell mediated cytotoxicity	5	132	237	26198	4.18712	0.007095	0.0824793	HLA-E,PLCG1,NFATC1,PTPN6,LAT
KEGG	Pos	PC3	M9809	Kegg cytokine cytokine receptor interaction	7	259	237	26198	2.98757	0.00952992	0.104269	TNFSF8,IL23A,TGFBR2,TNFSF4,IL6R,IL6ST,IL4R
KEGG	Pos	PC3	M19877	Kegg endometrial cancer	3	52	237	26198	6.37731	0.0116626	0.119822	LEF1,AXIN2,TCF7
KEGG	Pos	PC3	M19428	Kegg wnt signaling pathway	5	151	237	26198	3.66027	0.0122398	0.119822	LEF1,AXIN2,NFATC1,SMAD3,TCF7
KEGG	Pos	PC3	M17807	Kegg basal cell carcinoma	3	55	237	26198	6.02946	0.0135743	0.126241	LEF1,AXIN2,TCF7
KEGG	Pos	PC3	M11190	Kegg dorso ventral axis formation	2	24	237	26198	9.21167	0.0197323	0.174772	ETV6,ETS1
KEGG	Pos	PC3	M12294	Kegg viral myocarditis	3	68	237	26198	4.87677	0.0238141	0.201337	CD28,ABL2,HLA-E
KEGG	Pos	PC3	M9726	Kegg pancreatic cancer	3	70	237	26198	4.73743	0.025674	0.207625	SMAD3,NFKB1,TGFBR2
KEGG	Pos	PC3	M16376	Kegg arrhythmogenic right ventricular cardiomyopathy arvc	3	74	237	26198	4.48135	0.0296212	0.226835	LEF1,ACTN1,TCF7
KEGG	Pos	PC3	M9052	Kegg phosphatidylinositol signaling system	3	76	237	26198	4.36342	0.0317081	0.226835	INPP5A,DGKA,PLCG1
KEGG	Pos	PC3	M1749	Kegg vegf signaling pathway	3	76	237	26198	4.36342	0.0317081	0.226835	PLA2G6,PLCG1,NFATC1
KEGG	Pos	PC3	M11816	Kegg fc epsilon ri signaling pathway	3	79	237	26198	4.19772	0.0349791	0.240967	PLA2G6,LAT,PLCG1
KEGG	Pos	PC3	M18615	Kegg allograft rejection	2	35	237	26198	6.31658	0.039875	0.264884	CD28,HLA-E
KEGG	Pos	PC3	M2642	Kegg tgf beta signaling pathway	3	86	237	26198	3.85605	0.0432596	0.267093	SMAD3,SMURF1,TGFBR2
KEGG	Pos	PC3	M13519	Kegg graft versus host disease	2	37	237	26198	5.97514	0.0441141	0.267093	CD28,HLA-E
KEGG	Pos	PC3	M12467	Kegg erbb signaling pathway	3	87	237	26198	3.81173	0.0445156	0.267093	ABL2,CBL,PLCG1
KEGG	Pos	PC3	M13191	Kegg prostate cancer	3	89	237	26198	3.72607	0.0470816	0.273662	LEF1,TCF7,NFKB1
KEGG	Neg	PC1	M19708	Kegg type ii diabetes mellitus	5	47	278	26172	10.0153	0.00013892	0.0258391	HK2,HK1,PIK3R3,CACNA1C,PRKCZ
KEGG	Neg	PC1	M16121	Kegg fc gamma r mediated phagocytosis	6	96	278	26172	5.88399	0.000567221	0.0496588	DOCK2,DNM2,PLD1,INPP5D,LIMK2,PIK3R3
KEGG	Neg	PC1	M16473	Kegg aldosterone regulated sodium reabsorption	4	42	278	26172	8.96608	0.00101505	0.0496588	FXYD2,SCNN1A,PIK3R3,SGK1
KEGG	Neg	PC1	M8104	Kegg amino sugar and nucleotide sugar metabolism	4	44	278	26172	8.55853	0.0012108	0.0496588	GMDS,HK2,HK1,NAGK
KEGG	Neg	PC1	M19166	Kegg glycosaminoglycan biosynthesis chondroitin sulfate	3	22	278	26172	12.8378	0.00157217	0.0496588	XYLT1,CHSY1,CHST11
KEGG	Neg	PC1	M14314	Kegg purine metabolism	7	159	278	26172	4.1447	0.0016019	0.0496588	AMPD3,GUCY2D,PDE6A,AK5,ADCY2,ADCY9,ENTPD1
KEGG	Neg	PC1	M18155	Kegg insulin signaling pathway	6	137	278	26172	4.12309	0.00350865	0.0932297	PRKAG2,HK2,HK1,INPP5D,PRKCZ,PIK3R3
KEGG	Neg	PC1	M1979	Kegg gnrh signaling pathway	5	101	278	26172	4.66059	0.00451089	0.104878	ADCY2,PLD1,ADCY9,CACNA1C,MAP2K6
KEGG	Neg	PC1	M15898	Kegg fructose and mannose metabolism	3	34	278	26172	8.30681	0.00556226	0.105141	GMDS,HK2,HK1
KEGG	Neg	PC1	M10462	Kegg adipocytokine signaling pathway	4	67	278	26172	5.62053	0.00565276	0.105141	PRKAG2,RXRA,ACSL1,CAMKK2
KEGG	Neg	PC1	M12868	Kegg pathways in cancer	9	324	278	26172	2.61511	0.00812438	0.137376	NCOA4,CSF3R,PLD1,PIK3R3,SPI1,MSH3,RXRA,DAPK2,E2F3
KEGG	Neg	PC1	M17844	Kegg other glycan degradation	2	16	278	26172	11.768	0.012229	0.189549	GBA,NEU3
KEGG	Neg	PC1	M19818	Kegg non small cell lung cancer	3	54	278	26172	5.23022	0.0197471	0.282536	RXRA,PIK3R3,E2F3
KEGG	Neg	PC1	M13515	Kegg mismatch repair	2	22	278	26172	8.55853	0.0225787	0.291908	MSH3,LIG1
KEGG	Neg	PC1	M3261	Kegg toll like receptor signaling pathway	4	102	278	26172	3.69192	0.023541	0.291908	TLR6,SPP1,MAP2K6,PIK3R3
KEGG	Neg	PC1	M11190	Kegg dorso ventral axis formation	2	24	278	26172	7.84532	0.0266058	0.29258	ETV6,ETS2
KEGG	Neg	PC1	M11521	Kegg glycolysis gluconeogenesis	3	62	278	26172	4.55535	0.0283142	0.29258	HK2,HK1,ALDH2
KEGG	Neg	PC1	M15569	Kegg nod like receptor signaling pathway	3	62	278	26172	4.55535	0.0283142	0.29258	MEFV,NLRC4,NLRP3
KEGG	Neg	PC1	M4377	Kegg galactose metabolism	2	26	278	26172	7.24184	0.0308989	0.302484	HK2,HK1
KEGG	Neg	PC1	M13088	Kegg ppar signaling pathway	3	69	278	26172	4.09321	0.0371794	0.309057	RXRA,AQP7,ACSL1
KEGG	Neg	PC1	M523	Kegg thyroid cancer	2	29	278	26172	6.49268	0.0378089	0.309057	NCOA4,RXRA
KEGG	Neg	PC1	M9726	Kegg pancreatic cancer	3	70	278	26172	4.03474	0.0385488	0.309057	PIK3R3,E2F3,PLD1
KEGG	Neg	PC1	M2890	Kegg calcium signaling pathway	5	176	278	26172	2.67454	0.0401938	0.309057	ADCY2,ADCY9,CACNA1C,PTAFR,CYSLTR2
KEGG	Neg	PC1	M11266	Kegg lysosome	4	121	278	26172	3.11219	0.0403575	0.309057	AP4S1,CTSG,GBA,AP3S2
KEGG	Neg	PC1	M1519	Kegg endocytosis	5	181	278	26172	2.60066	0.0444208	0.309057	DNM2,RAB31,PLD1,PRKCZ,VPS37B
KEGG	Neg	PC1	M4741	Kegg systemic lupus erythematosus	4	125	278	26172	3.0126	0.0445802	0.309057	CTSG,ELANE,HLA-DMB,ACTN4
KEGG	Neg	PC1	M5436	Kegg b cell receptor signaling pathway	3	75	278	26172	3.76576	0.0457745	0.309057	INPP5D,PIK3R3,PIK3AP1
KEGG	Neg	PC2	M5436	Kegg b cell receptor signaling pathway	9	75	273	26174	11.5051	8.8181e-08	1.64017e-05	CARD11,PPP3CC,INPP5D,CD19,CD81,VAV2,SYK,BLNK,NFATC1
KEGG	Neg	PC2	M11816	Kegg fc epsilon ri signaling pathway	5	79	273	26174	6.06807	0.00143007	0.104664	INPP5D,PRKCE,MAPK13,VAV2,SYK
KEGG	Neg	PC2	M6856	Kegg hematopoietic cell lineage	5	82	273	26174	5.84606	0.00168814	0.104664	GP9,FCER2,MME,CD19,CD9
KEGG	Neg	PC2	M16121	Kegg fc gamma r mediated phagocytosis	5	96	273	26174	4.99351	0.003362	0.156333	VAV2,INPP5D,PRKCE,LIMK1,SYK
KEGG	Neg	PC2	M9904	Kegg t cell receptor signaling pathway	5	108	273	26174	4.43868	0.00554493	0.177951	PPP3CC,VAV2,NFATC1,CARD11,MAPK13
KEGG	Neg	PC2	M4085	Kegg primary immunodeficiency	3	35	273	26174	8.2179	0.00574034	0.177951	BLNK,CD19,RAG1
KEGG	Neg	PC2	M9052	Kegg phosphatidylinositol signaling system	4	76	273	26174	5.04608	0.00825545	0.219359	DGKD,INPP5D,INPP5J,ITPR1
KEGG	Neg	PC2	M13720	Kegg lysine degradation	3	44	273	26174	6.53696	0.0108453	0.227721	ALDH3A2,KMT5B,EHMT1
KEGG	Neg	PC2	M5539	Kegg axon guidance	5	129	273	26174	3.7161	0.0114924	0.227721	PPP3CC,NFATC1,SEMA5B,DPYSL2,LIMK1
KEGG	Neg	PC2	M11079	Kegg n glycan biosynthesis	3	46	273	26174	6.25275	0.0122431	0.227721	MGAT5,MAN1C1,ST6GAL1
KEGG	Neg	PC2	M4844	Kegg chemokine signaling pathway	6	188	273	26174	3.05986	0.0142932	0.241685	VAV2,GNG7,CXCR5,CCR6,ELMO1,PARD3
KEGG	Neg	PC2	M19428	Kegg wnt signaling pathway	5	151	273	26174	3.17468	0.021291	0.312255	LRP5,PPP3CC,NFATC1,TCF7L2,PPP2R5C
KEGG	Neg	PC2	M13515	Kegg mismatch repair	2	22	273	26174	8.71595	0.0218242	0.312255	RFC3,LIG1
KEGG	Neg	PC2	M16817	Kegg oocyte meiosis	4	113	273	26174	3.39382	0.0308159	0.397464	PPP3CC,REC8,ITPR1,PPP2R5C
KEGG	Neg	PC2	M1386	Kegg pentose phosphate pathway	2	27	273	26174	7.10189	0.0320536	0.397464	RPEL1,PGM1
KEGG	Neg	PC2	M19580	Kegg pentose and glucuronate interconversions	2	28	273	26174	6.84825	0.034286	0.398575	CRYL1,RPEL1
KEGG	Neg	PC2	M523	Kegg thyroid cancer	2	29	273	26174	6.6121	0.0365772	0.400197	CCDC6,TCF7L2
KEGG	Neg	PC2	M6929	Kegg o glycan biosynthesis	2	30	273	26174	6.3917	0.0389256	0.400593	GALNT7,GALNT2
KEGG	Neg	PC2	M638	Kegg adherens junction	3	73	273	26174	3.94009	0.0409208	0.400593	PTPRJ,TCF7L2,PARD3
KEGG	Neg	PC2	M1749	Kegg vegf signaling pathway	3	76	273	26174	3.78456	0.0452267	0.416289	PPP3CC,MAPK13,NFATC1
KEGG	Neg	PC2	M5500	Kegg base excision repair	2	34	273	26174	5.63973	0.0488631	0.416289	LIG1,PARP1
KEGG	Neg	PC2	M5669	Kegg natural killer cell mediated cytotoxicity	4	132	273	26174	2.90532	0.0497585	0.416289	PPP3CC,VAV2,NFATC1,SYK
KEGG	Neg	PC3	M5669	Kegg natural killer cell mediated cytotoxicity	16	132	267	26184	11.887	4.77411e-13	8.87984e-11	SH2D1B,PRF1,GZMB,CD247,PLCG2,PRKCB,KLRD1,SH3BP2,TYROBP,MAPK1,KIR2DL4,IFNG,PPP3CA,FASLG,FYN,VAV3
KEGG	Neg	PC3	M4844	Kegg chemokine signaling pathway	11	188	267	26184	5.73799	3.96542e-06	0.000368784	CX3CR1,CCL18,FGR,GNG2,FOXO3,PRKCB,PREX1,MAPK1,XCL2,ITK,VAV3
KEGG	Neg	PC3	M9904	Kegg t cell receptor signaling pathway	8	108	267	26184	7.26425	1.53738e-05	0.000953173	CD247,PRKCQ,MAPK1,ITK,IFNG,PPP3CA,FYN,VAV3
KEGG	Neg	PC3	M13519	Kegg graft versus host disease	5	37	267	26184	13.2524	3.54455e-05	0.00164822	KLRD1,IFNG,PRF1,FASLG,GZMB
KEGG	Neg	PC3	M5436	Kegg b cell receptor signaling pathway	6	75	267	26184	7.84539	0.000118758	0.0044178	PRKCB,MAPK1,PIK3AP1,PPP3CA,PLCG2,VAV3
KEGG	Neg	PC3	M18615	Kegg allograft rejection	4	35	267	26184	11.2077	0.000431591	0.0133793	IFNG,PRF1,FASLG,GZMB
KEGG	Neg	PC3	M12617	Kegg type i diabetes mellitus	4	41	267	26184	9.56755	0.000795703	0.021143	IFNG,PRF1,FASLG,GZMB
KEGG	Neg	PC3	M11816	Kegg fc epsilon ri signaling pathway	5	79	267	26184	6.2068	0.00129447	0.0267225	PRKCB,MAPK1,PLCG2,FYN,VAV3
KEGG	Neg	PC3	M7946	Kegg notch signaling pathway	4	47	267	26184	8.34616	0.00133604	0.0267225	RBPJ,CTBP2,NCOR2,MAML3
KEGG	Neg	PC3	M9809	Kegg cytokine cytokine receptor interaction	9	259	267	26184	3.40775	0.00143669	0.0267225	CCL18,IL23R,PLEKHO2,IL18RAP,IL18R1,CX3CR1,XCL2,IFNG,FASLG
KEGG	Neg	PC3	M16763	Kegg neurotrophin signaling pathway	6	126	267	26184	4.66988	0.00188766	0.0302065	RPS6KA5,FOXO3,PLCG2,RAPGEF1,MAPK1,FASLG
KEGG	Neg	PC3	M19877	Kegg endometrial cancer	4	52	267	26184	7.54365	0.00194881	0.0302065	AXIN1,MAPK1,TCF7L2,FOXO3
KEGG	Neg	PC3	M19818	Kegg non small cell lung cancer	4	54	267	26184	7.26425	0.00224065	0.0320585	PRKCB,MAPK1,FOXO3,PLCG2
KEGG	Neg	PC3	M6382	Kegg regulation of autophagy	3	35	267	26184	8.40578	0.00539247	0.0665325	IFNG,ATG5,ATG7
KEGG	Neg	PC3	M3115	Kegg long term potentiation	4	70	267	26184	5.60385	0.00572323	0.0665325	PRKCB,MAPK1,ITPR1,PPP3CA
KEGG	Neg	PC3	M3126	Kegg leishmania infection	4	70	267	26184	5.60385	0.00572323	0.0665325	PRKCB,JAK1,MAPK1,IFNG
KEGG	Neg	PC3	M12868	Kegg pathways in cancer	9	324	267	26184	2.72409	0.00629436	0.0688677	CTBP2,JAK1,AXIN1,PLCG2,ZBTB16,PRKCB,TCF7L2,MAPK1,FASLG
KEGG	Neg	PC3	M9052	Kegg phosphatidylinositol signaling system	4	76	267	26184	5.16144	0.00763814	0.0743391	PRKCB,DGKD,ITPR1,PLCG2
KEGG	Neg	PC3	M1749	Kegg vegf signaling pathway	4	76	267	26184	5.16144	0.00763814	0.0743391	PRKCB,MAPK1,PPP3CA,PLCG2
KEGG	Neg	PC3	M9131	Kegg glycerophospholipid metabolism	4	77	267	26184	5.09441	0.00799345	0.0743391	LPCAT1,DGKD,AGPAT3,AGPAT4
KEGG	Neg	PC3	M19096	Kegg bladder cancer	3	42	267	26184	7.00482	0.00897721	0.0795124	RPS6KA5,THBS1,MAPK1
KEGG	Neg	PC3	M15902	Kegg glycerolipid metabolism	3	49	267	26184	6.00413	0.0136769	0.115632	DGKD,AGPAT3,AGPAT4
KEGG	Neg	PC3	M13103	Kegg autoimmune thyroid disease	3	50	267	26184	5.88404	0.0144424	0.116795	PRF1,GZMB,FASLG
KEGG	Neg	PC3	M7253	Kegg focal adhesion	6	199	267	26184	2.95681	0.0166549	0.125764	THBS1,RAPGEF1,VAV3,PRKCB,MAPK1,FYN
KEGG	Neg	PC3	M16121	Kegg fc gamma r mediated phagocytosis	4	96	267	26184	4.08614	0.0169037	0.125764	PLCG2,PRKCB,MAPK1,VAV3
KEGG	Neg	PC3	M17906	Kegg vibrio cholerae infection	3	54	267	26184	5.44819	0.0177434	0.126934	PRKCB,ARF1,PLCG2
KEGG	Neg	PC3	M3624	Kegg glycosaminoglycan degradation	2	21	267	26184	9.33975	0.0191473	0.129717	HEXA,ARSB
KEGG	Neg	PC3	M19428	Kegg wnt signaling pathway	5	151	267	26184	3.24727	0.0195297	0.129717	CTBP2,AXIN1,PRKCB,TCF7L2,PPP3CA
KEGG	Neg	PC3	M19888	Kegg acute myeloid leukemia	3	57	267	26184	5.16144	0.0204719	0.129717	ZBTB16,TCF7L2,MAPK1
KEGG	Neg	PC3	M11673	Kegg biosynthesis of unsaturated fatty acids	2	22	267	26184	8.91522	0.0209221	0.129717	ACOT7,HSD17B12
KEGG	Neg	PC3	M14631	Kegg colorectal cancer	3	62	267	26184	4.7452	0.0255028	0.153017	AXIN1,TCF7L2,MAPK1
KEGG	Neg	PC3	M1835	Kegg glioma	3	65	267	26184	4.52619	0.028811	0.165964	PRKCB,MAPK1,PLCG2
KEGG	Neg	PC3	M9387	Kegg vascular smooth muscle contraction	4	115	267	26184	3.41104	0.0303376	0.165964	PRKCB,PRKCQ,MAPK1,ITPR1
KEGG	Neg	PC3	M2164	Kegg leukocyte transendothelial migration	4	115	267	26184	3.41104	0.0303376	0.165964	PLCG2,PRKCB,ITK,VAV3
KEGG	Neg	PC3	M12294	Kegg viral myocarditis	3	68	267	26184	4.3265	0.0323354	0.171816	PRF1,SGCG,FYN
KEGG	Neg	PC3	M2890	Kegg calcium signaling pathway	5	176	267	26184	2.78601	0.0346852	0.171816	PLCG2,PRKCB,ITPR1,PTAFR,PPP3CA
KEGG	Neg	PC3	M8232	Kegg long term depression	3	70	267	26184	4.20289	0.0348043	0.171816	PRKCB,MAPK1,ITPR1
KEGG	Neg	PC3	M523	Kegg thyroid cancer	2	29	267	26184	6.76327	0.0351021	0.171816	MAPK1,TCF7L2
KEGG	Neg	PC3	M638	Kegg adherens junction	3	73	267	26184	4.03017	0.0386851	0.184498	TCF7L2,MAPK1,FYN
KEGG	Neg	PC3	M5539	Kegg axon guidance	4	129	267	26184	3.04085	0.04335	0.201577	EFNA5,MAPK1,PPP3CA,FYN
KEGG	Neg	PC3	M11355	Kegg tight junction	4	132	267	26184	2.97174	0.0464881	0.210897	MAP3K20,PRKCB,PRKCQ,EXOC4
KEGG	Neg	PC3	M13036	Kegg prion diseases	2	35	267	26184	5.60385	0.0494447	0.216519	FYN,MAPK1
WP	Pos	PC1	M39725	Wp tcell antigen receptor tcr signaling pathway	13	90	243	25991	15.4496	2.62658e-12	1.61535e-09	NFATC2,LAT,CD247,MAPK1,PRKCQ,NFKB1,SKAP1,ZAP70,LCK,OPRM1,PIK3R1,FYN,ITK
WP	Pos	PC1	M39632	Wp tcell receptor and costimulatory signaling	8	29	243	25991	29.5059	1.88485e-10	5.7959e-08	NFKB1,NFATC2,ZAP70,LCK,PDCD1,FYN,RASGRP1,ITK
WP	Pos	PC1	M39429	Wp tcell antigen receptor tcr pathway during staphylococcus aureus infection	10	62	243	25991	17.2514	2.97761e-10	6.10411e-08	NFATC2,LAT,PRKCQ,PTPRC,NFKB1,ZAP70,LCK,PDCD1,FYN,ITK
WP	Pos	PC1	M39601	Wp prolactin signaling pathway	9	76	243	25991	12.6662	3.889e-08	5.97934e-06	RPS6KA2,PRLR,MAPK1,YWHAZ,NFKB1,ZAP70,IRF1,PIK3R1,FYN
WP	Pos	PC1	M39492	Wp dna damage response only atm dependent	10	111	243	25991	9.63593	9.56796e-08	1.17686e-05	ATM,BCL2,FASLG,CCND3,PIK3R1,TCF7,MAPK1,PIK3R5,NFKB1,PPP2R5C
WP	Pos	PC1	M39323	Wp b cell receptor signaling pathway	9	97	243	25991	9.92402	3.29059e-07	3.37286e-05	PTPRC,LCK,PIK3R1,NFATC2,MAPK1,ETS1,NFKB1,PTPN18,FYN
WP	Pos	PC1	M39843	Wp cancer immunotherapy by pd1 blockade	5	23	243	25991	23.2519	2.01037e-06	0.000176625	NFKB1,PDCD1,NFATC2,ZAP70,LCK
WP	Pos	PC1	M39435	Wp interferon type i signaling pathways	6	54	243	25991	11.8843	1.1141e-05	0.000787753	PTPRC,RPTOR,ZAP70,LCK,PIK3R1,FYN
WP	Pos	PC1	M39818	Wp il18 signaling pathway	12	274	243	25991	4.68433	1.15281e-05	0.000787753	BCL2,FASLG,SPON1,RPTOR,IRF1,PIK3R1,NFKB1,TNIP3,LCK,KLF2,MAPK1,B2M
WP	Pos	PC1	M39637	Wp signaling pathways in glioblastoma	7	83	243	25991	9.02063	1.29965e-05	0.000799286	PRKCH,ATM,MAPK1,PRKCQ,E2F1,PIK3R1,MAP2K5
WP	Pos	PC1	M39654	Wp apoptosis	7	85	243	25991	8.80838	1.52077e-05	0.000850248	BCL2,FASLG,LTA,DIABLO,NFKB1,IRF1,PIK3R1
WP	Pos	PC1	M39808	Wp mfap5 effect on permeability and motility of endothelial cells via cytoskeleton rearrangement	4	18	243	25991	23.7686	2.0576e-05	0.00105452	MAPK1,LPP,PRKCQ,ACTN1
WP	Pos	PC1	M39876	Wp pathogenesis of sarscov2 mediated by nsp9nsp10 complex	4	21	243	25991	20.3731	3.93662e-05	0.00186232	CD247,FYN,ZAP70,LCK
WP	Pos	PC1	M39536	Wp il2 signaling pathway	5	42	243	25991	12.7332	4.39716e-05	0.00193161	BCL2,LCK,PIK3R1,MAPK1,FYN
WP	Pos	PC1	M39764	Wp ras signaling	9	184	243	25991	5.23168	6.22638e-05	0.00252331	FASLG,PIK3R1,RASGRP1,LAT,MAPK1,EXOC2,ETS1,NFKB1,ZAP70
WP	Pos	PC1	M39691	Wp brainderived neurotrophic factor bdnf signaling pathway	8	144	243	25991	5.94216	6.56471e-05	0.00252331	PIK3R1,NCK2,MAP2K5,KIDINS220,MAPK1,NFKB1,FYN,RANBP9
WP	Pos	PC1	M39805	Wp translation inhibitors in chronically activated pdgfra cells	5	47	243	25991	11.3786	7.63325e-05	0.00276144	RPS6KA2,RPTOR,PIK3R1,MAPK1,MAP2K5
WP	Pos	PC1	M39736	Wp pi3kakt signaling pathway	12	341	243	25991	3.76395	9.6546e-05	0.00326301	BCL2,FASLG,RPTOR,PIK3R1,ITGA9,PRLR,NFKB1,PPP2R3A,PPP2R5C,CCND3,MAPK1,PIK3R5
WP	Pos	PC1	M39866	Wp gastrin signaling pathway	7	114	243	25991	6.56765	0.000100809	0.00326301	PIK3R1,PRKCH,MAPK1,PRKCQ,NFKB1,HDC,FYN
WP	Pos	PC1	M39540	Wp notch signaling pathway netpath	5	62	243	25991	8.62571	0.000287371	0.00883667	HIF1A,NFKB1,LCK,PIK3R1,DTX1
WP	Pos	PC1	M39636	Wp prion disease pathway	4	36	243	25991	11.8843	0.000347082	0.00970253	NFKB1,BCL2,MAPK1,FYN
WP	Pos	PC1	M39908	Wp hostpathogen interaction of human corona viruses mapk signaling	4	36	243	25991	11.8843	0.000347082	0.00970253	RPS6KA2,BCL2,MAPK1,IFITM1
WP	Pos	PC1	M39562	Wp oncostatin m signaling pathway	5	66	243	25991	8.10294	0.00038504	0.0102956	PRKCH,HIF1A,MAPK1,NFKB1,PIK3R1
WP	Pos	PC1	M39387	Wp wnt signaling pathway and pluripotency	6	103	243	25991	6.23061	0.000421519	0.0108014	CCND3,TCF7,PRKCH,PRKCQ,PPP2R3A,PPP2R5C
WP	Pos	PC1	M39684	Wp human thyroid stimulating hormone tsh signaling pathway	5	68	243	25991	7.86462	0.000442368	0.0108822	MAPK1,E2F1,CCND3,GNA13,PIK3R1
WP	Pos	PC1	M39905	Wp kisspeptinkisspeptin receptor system in the ovary	4	40	243	25991	10.6959	0.000522966	0.0123029	NFKB1,PRKCH,MAPK1,PRKCQ
WP	Pos	PC1	M39568	Wp nongenomic actions of 125 dihydroxyvitamin d3	5	71	243	25991	7.53231	0.000540129	0.0123029	PRKCH,MAPK1,ETS1,PRKCQ,NFKB1
WP	Pos	PC1	M39402	Wp focal adhesion	8	199	243	25991	4.29985	0.000595545	0.0130807	BCL2,PIK3R1,ITGA9,ACTN1,TXK,CCND3,MAPK1,FYN
WP	Pos	PC1	M39801	Wp hepatitis b infection	7	154	243	25991	4.86177	0.000634693	0.0134599	BCL2,FASLG,PIK3R1,NFATC2,MAPK1,YWHAZ,NFKB1
WP	Pos	PC1	M39857	Wp head and neck squamous cell carcinoma	5	75	243	25991	7.13059	0.000694681	0.0140601	PIK3R5,E2F1,NFKB1,RPTOR,PIK3R1
WP	Pos	PC1	M39824	Wp regulatory circuits of the stat3 signaling pathway	5	76	243	25991	7.03677	0.000738006	0.0140601	MAPK1,PTPRC,RPTOR,IL21R,IL12RB2
WP	Pos	PC1	M39628	Wp integrated cancer pathway	4	44	243	25991	9.72353	0.000754445	0.0140601	ATM,BCL2,CDC25B,E2F1
WP	Pos	PC1	M39716	Wp interleukin11 signaling pathway	4	44	243	25991	9.72353	0.000754445	0.0140601	BCL2,PIK3R1,MAPK1,FYN
WP	Pos	PC1	M39482	Wp insulin signaling	7	160	243	25991	4.67945	0.000795409	0.0142213	RPS6KA2,INPP4A,PIK3R1,MAP2K5,PRKCH,MAPK1,PRKCQ
WP	Pos	PC1	M39479	Wp nanomaterial induced apoptosis	3	20	243	25991	16.0438	0.00081807	0.0142213	BCL2,FASLG,DIABLO
WP	Pos	PC1	M39729	Wp vegfavegfr2 signaling pathway	12	433	243	25991	2.96422	0.000835127	0.0142213	MYH9,NFATC2,SLC25A25,ETS1,NFKB1,MAPK1,HERPUD1,BCL2,PIK3R1,UBAP2L,USP10,FYN
WP	Pos	PC1	M39334	Wp egfegfr signaling pathway	7	162	243	25991	4.62168	0.000855589	0.0142213	RPS6KA2,E2F1,PIK3R1,NCK2,MAP2K5,EPS15L1,MAPK1
WP	Pos	PC1	M39380	Wp thymic stromal lymphopoietin tslp signaling pathway	4	46	243	25991	9.30077	0.00089377	0.014465	NFKB1,LCK,MAPK1,FYN
WP	Pos	PC1	M39400	Wp chemokine signaling pathway	7	165	243	25991	4.53765	0.000952537	0.0150208	CXCR6,CCR7,PIK3R1,ITK,MAPK1,PIK3R5,NFKB1
WP	Pos	PC1	M39734	Wp ciliary landscape	8	217	243	25991	3.94318	0.0010445	0.0153792	UBE2D2,CDH23,NFKB1,RANBP9,GLB1,EXOC1,EXOC2,LZTFL1
WP	Pos	PC1	M39683	Wp mirna regulation of prostate cancer signaling pathways	4	48	243	25991	8.91324	0.00105029	0.0153792	BCL2,MAPK1,NFKB1,TCF7
WP	Pos	PC1	M39722	Wp il3 signaling pathway	4	48	243	25991	8.91324	0.00105029	0.0153792	BCL2,MAPK1,PIK3R1,FYN
WP	Pos	PC1	M39672	Wp estrogen signaling pathway	3	23	243	25991	13.9512	0.00124486	0.0173998	NFKB1,MAPK1,BCL2
WP	Pos	PC1	M39748	Wp the human immune response to tuberculosis	3	23	243	25991	13.9512	0.00124486	0.0173998	TAP1,IRF1,IFITM1
WP	Pos	PC1	M39332	Wp microrna network associated with chronic lymphocytic leukemia	2	6	243	25991	35.6529	0.00127386	0.0174095	BCL2,ZAP70
WP	Pos	PC1	M39499	Wp il7 signaling pathway	3	25	243	25991	12.8351	0.00159459	0.0213189	PIK3R1,MAPK1,FYN
WP	Pos	PC1	M39718	Wp vitamin d receptor pathway	7	184	243	25991	4.06909	0.00178425	0.0233471	HIF1A,RASGRP1,NFATC2,GXYLT2,SATB1,PRKCQ,CDKAL1
WP	Pos	PC1	M39685	Wp cardiac hypertrophic response	4	57	243	25991	7.50588	0.0019969	0.0255853	NFATC2,MAPK1,NFKB1,MAP2K5
WP	Pos	PC1	M39350	Wp kit receptor signaling pathway	4	60	243	25991	7.13059	0.00241198	0.0296977	BCL2,MAPK1,PIK3R1,FYN
WP	Pos	PC1	M39719	Wp focal adhesionpi3kaktmtorsignaling pathway	9	305	243	25991	3.15616	0.00241445	0.0296977	HIF1A,RPTOR,PIK3R1,ITGA9,PRLR,PPP2R3A,PPP2R5C,MAPK1,PIK3R5
WP	Pos	PC1	M39520	Wp regulation of actin cytoskeleton	6	149	243	25991	4.30707	0.00283811	0.0342242	PIP4K2A,PIK3R1,MAPK1,PIK3R5,GNA13,ACTN1
WP	Pos	PC1	M39627	Wp g1 to s cell cycle control	4	64	243	25991	6.68493	0.0030528	0.0361052	ATM,RPA1,E2F1,CCND3
WP	Pos	PC1	M39360	Wp integrated breast cancer pathway	6	153	243	25991	4.19446	0.00323516	0.0375401	ATM,BCL2,CDC25B,E2F1,MAPK1,NFKB1
WP	Pos	PC1	M39619	Wp senescence and autophagy in cancer	5	107	243	25991	4.99808	0.00336287	0.0382994	BCL2,CDC25B,E2F1,IRF1,MAPK1
WP	Pos	PC1	M39811	Wp melanoma	4	68	243	25991	6.2917	0.00380102	0.0425023	MAPK1,ETS1,E2F1,PIK3R1
WP	Pos	PC1	M39456	Wp rac1pak1p38mmp2 pathway	4	69	243	25991	6.20051	0.0040058	0.0439923	TNIP3,MAPK1,NFKB1,PIK3R1
WP	Pos	PC1	M40047	Wp camkk2 pathway	3	35	243	25991	9.1679	0.00423644	0.045709	NFATC2,RPTOR,MAPK1
WP	Pos	PC1	M39439	Wp nad metabolism sirtuins and aging	2	11	243	25991	19.4471	0.00452887	0.0480216	NFKB1,HIF1A
WP	Pos	PC1	M39758	Wp chromosomal and microsatellite instability in colorectal cancer	4	73	243	25991	5.86076	0.00489946	0.0508496	BCL2,MAPK1,EXOC2,TCF7
WP	Pos	PC1	M39506	Wp neovascularisation processes	3	37	243	25991	8.67234	0.00496094	0.0508496	NFKB1,HIF1A,MAPK1
WP	Pos	PC1	M39852	Wp osteoblast differentiation	5	119	243	25991	4.49407	0.00528078	0.0532406	PIK3R1,PRKCH,MAPK1,PIK3R5,PRKCQ
WP	Pos	PC1	M39552	Wp mapk and nfkb signalling pathways inhibited by yersinia yopj	2	12	243	25991	17.8265	0.00540127	0.0535771	NFKB1,MAPK1
WP	Pos	PC1	M39491	Wp leptin signaling pathway	4	76	243	25991	5.62941	0.00565125	0.0544138	MAPK1,NFKB1,PIK3R1,FYN
WP	Pos	PC1	M39650	Wp cell cycle	5	121	243	25991	4.41979	0.00566257	0.0544138	ATM,CDC25B,E2F1,CCND3,YWHAZ
WP	Pos	PC1	M39555	Wp pdgf pathway	3	39	243	25991	8.2276	0.0057557	0.0544578	NFKB1,PIK3R1,MAPK1
WP	Pos	PC1	M39860	Wp 3q29 copy number variation syndrome	4	77	243	25991	5.5563	0.00591799	0.0551449	ATM,HIF1A,HFE,FYN
WP	Pos	PC1	M39392	Wp il5 signaling pathway	3	40	243	25991	8.02191	0.00617997	0.0557379	BCL2,PIK3R1,MAPK1
WP	Pos	PC1	M39463	Wp mfap5mediated ovarian cancer cell motility and invasiveness	2	13	243	25991	16.4552	0.00634415	0.0557379	MAPK1,PRKCQ
WP	Pos	PC1	M39603	Wp osteopontin signaling	2	13	243	25991	16.4552	0.00634415	0.0557379	NFKB1,MAPK1
WP	Pos	PC1	M39712	Wp homologous recombination	2	13	243	25991	16.4552	0.00634415	0.0557379	ATM,RPA1
WP	Pos	PC1	M39523	Wp bladder cancer	3	41	243	25991	7.82626	0.00662245	0.0573635	PIK3R1,MAPK1,E2F1
WP	Pos	PC1	M39656	Wp il6 signaling pathway	3	43	243	25991	7.46225	0.00756275	0.0645984	IRF1,PIK3R1,MAPK1
WP	Pos	PC1	M39376	Wp mirnas involved in dna damage response	3	44	243	25991	7.29265	0.00806091	0.0674526	ATM,E2F1,CCND3
WP	Pos	PC1	M39338	Wp angiopoietin like protein 8 regulatory pathway	5	132	243	25991	4.05147	0.00811625	0.0674526	RPS6KA2,RPTOR,PIK3R1,MAP2K5,MAPK1
WP	Pos	PC1	M39776	Wp viral acute myocarditis	4	86	243	25991	4.97483	0.00870266	0.0713618	BCL2,MAPK1,PIK3R1,FYN
WP	Pos	PC1	M39678	Wp retinoblastoma gene in cancer	4	88	243	25991	4.86177	0.00941979	0.075236	CDC25B,RPA1,E2F1,CCND3
WP	Pos	PC1	M39732	Wp pancreatic adenocarcinoma pathway	4	88	243	25991	4.86177	0.00941979	0.075236	MAPK1,E2F1,NFKB1,PIK3R1
WP	Pos	PC1	M39661	Wp aryl hydrocarbon receptor netpath	3	48	243	25991	6.68493	0.010244	0.0807699	NFKB1,MAPK1,E2F1
WP	Pos	PC1	M39443	Wp amplification and expansion of oncogenic pathways as metastatic traits	2	17	243	25991	12.5834	0.0107931	0.0832675	CYTIP,TCF7
WP	Pos	PC1	M39441	Wp corticotropinreleasing hormone signaling pathway	4	92	243	25991	4.65038	0.0109669	0.0832675	BCL2,MAPK1,PRKCQ,NFKB1
WP	Pos	PC1	M39664	Wp apoptosis modulation and signaling	4	92	243	25991	4.65038	0.0109669	0.0832675	BCL2,FASLG,DIABLO,NFKB1
WP	Pos	PC1	M39559	Wp regulation of tolllike receptor signaling pathway	5	143	243	25991	3.73982	0.0112249	0.0841871	RNF216,PIK3R1,MAPK1,PIK3R5,NFKB1
WP	Pos	PC1	M39413	Wp hepatitis c and hepatocellular carcinoma	3	50	243	25991	6.41753	0.0114516	0.0848523	FASLG,HIF1A,NFKB1
WP	Pos	PC1	M39426	Wp g protein signaling pathways	4	94	243	25991	4.55144	0.0117983	0.0863807	PDE7A,PRKCH,PRKCQ,GNA13
WP	Pos	PC1	M39644	Wp il9 signaling pathway	2	18	243	25991	11.8843	0.0120681	0.0864208	PIK3R1,MAPK1
WP	Pos	PC1	M39822	Wp synaptic signaling pathways associated with autism spectrum disorder	3	51	243	25991	6.2917	0.0120849	0.0864208	MAPK1,RPTOR,PIK3R1
WP	Pos	PC1	M39791	Wp thyroid hormones production and their peripheral downstream signalling effects	4	95	243	25991	4.50353	0.0122288	0.0864449	DIO1,MAPK1,PRKCQ,RPTOR
WP	Pos	PC1	M39834	Wp small cell lung cancer	4	97	243	25991	4.41067	0.0131196	0.0905973	BCL2,E2F1,PIK3R1,NFKB1
WP	Pos	PC1	M39368	Wp tp53 network	2	19	243	25991	11.2588	0.0134054	0.0905973	ATM,BCL2
WP	Pos	PC1	M39450	Wp apoptosis modulation by hsp70	2	19	243	25991	11.2588	0.0134054	0.0905973	NFKB1,FASLG
WP	Pos	PC1	M39473	Wp overview of nanoparticle effects	2	19	243	25991	11.2588	0.0134054	0.0905973	BCL2,CCND3
WP	Pos	PC1	M39625	Wp micrornas in cardiomyocyte hypertrophy	4	98	243	25991	4.36567	0.01358	0.0907795	PIK3R1,MAP2K5,MAPK1,NFKB1
WP	Pos	PC1	M39688	Wp apoptosisrelated network due to altered notch3 in ovarian cancer	3	54	243	25991	5.94216	0.0141034	0.0911194	MAPK1,ETS1,NFKB1
WP	Pos	PC1	M39329	Wp calcium regulation in the cardiac cell	5	152	243	25991	3.51838	0.0143063	0.0911194	STIM2,ATP2B2,PRKCH,YWHAZ,PRKCQ
WP	Pos	PC1	M39577	Wp integrinmediated cell adhesion	4	100	243	25991	4.27835	0.0145315	0.0911194	MAP2K5,ITGA9,MAPK1,FYN
WP	Pos	PC1	M39485	Wp serotonin receptor 2 and elksrfgata4 signaling	2	20	243	25991	10.6959	0.014804	0.0911194	MAPK1,RASGRP1
WP	Pos	PC1	M39701	Wp ltf danger signal response pathway	2	20	243	25991	10.6959	0.014804	0.0911194	NFKB1,MAPK1
WP	Pos	PC1	M39613	Wp pathogenic escherichia coli infection	3	55	243	25991	5.83412	0.0148162	0.0911194	YWHAZ,NCK2,FYN
WP	Pos	PC1	M39667	Wp ranklrank receptor activator of nfkb ligand signaling pathway	3	55	243	25991	5.83412	0.0148162	0.0911194	MAPK1,NFKB1,PIK3R1
WP	Pos	PC1	M39720	Wp il4 signaling pathway	3	55	243	25991	5.83412	0.0148162	0.0911194	MAPK1,NFKB1,PIK3R1
WP	Pos	PC1	M39739	Wp breast cancer pathway	5	155	243	25991	3.45029	0.015448	0.0937509	ATM,E2F1,PIK3R1,TCF7,MAPK1
WP	Pos	PC1	M39346	Wp il1 signaling pathway	3	56	243	25991	5.72994	0.0155489	0.0937509	MAPK1,NFKB1,PIK3R1
WP	Pos	PC1	M39902	Wp hostpathogen interaction of human corona viruses apoptosis	2	21	243	25991	10.1866	0.0162626	0.0971019	BCL2,FASLG
WP	Pos	PC1	M39434	Wp tolllike receptor signaling pathway	4	104	243	25991	4.1138	0.0165586	0.0979184	PIK3R1,MAPK1,PIK3R5,NFKB1
WP	Pos	PC1	M39750	Wp met in type 1 papillary renal cell carcinoma	3	58	243	25991	5.53235	0.0170749	0.10001	MAPK1,ETS1,PIK3R1
WP	Pos	PC1	M39593	Wp hematopoietic stem cell gene regulation by gabp alphabeta complex	2	22	243	25991	9.72353	0.0177799	0.102193	ATM,BCL2
WP	Pos	PC1	M39658	Wp type ii diabetes mellitus	2	22	243	25991	9.72353	0.0177799	0.102193	MAPK1,PIK3R5
WP	Pos	PC1	M39366	Wp hematopoietic stem cell differentiation	3	62	243	25991	5.17543	0.0203694	0.115992	NFATC2,RUNX1,IKZF1
WP	Pos	PC1	M39410	Wp ebv lmp1 signaling	2	24	243	25991	8.91324	0.0209857	0.117329	NFKB1,MAPK1
WP	Pos	PC1	M39556	Wp angiogenesis	2	24	243	25991	8.91324	0.0209857	0.117329	HIF1A,MAPK1
WP	Pos	PC1	M39623	Wp endometrial cancer	3	63	243	25991	5.09328	0.0212437	0.117702	MAPK1,PIK3R1,TCF7
WP	Pos	PC1	M39420	Wp agerage pathway	3	66	243	25991	4.86177	0.0239885	0.131723	HIF1A,MAPK1,NFKB1
WP	Pos	PC1	M39687	Wp epo receptor signaling	2	26	243	25991	8.2276	0.024412	0.132862	MAPK1,PTPRC
WP	Pos	PC1	M39339	Wp dna damage response	3	68	243	25991	4.71877	0.0259199	0.139831	ATM,E2F1,CCND3
WP	Pos	PC1	M39597	Wp mapk signaling pathway	6	247	243	25991	2.59819	0.0291057	0.155652	FASLG,MAP2K5,NFKB1,CDC25B,RASGRP1,MAPK1
WP	Pos	PC1	M39797	Wp selective expression of chemokine receptors during tcell polarization	2	29	243	25991	7.37647	0.0299448	0.156489	CCR7,IL12RB2
WP	Pos	PC1	M40051	Wp ras and bradykinin pathways in covid19	2	29	243	25991	7.37647	0.0299448	0.156489	NFKB1,MAPK1
WP	Pos	PC1	M39738	Wp nonsmall cell lung cancer	3	72	243	25991	4.45662	0.0300256	0.156489	MAPK1,E2F1,PIK3R1
WP	Pos	PC1	M39445	Wp pi3kaktmtor signaling pathway and therapeutic opportunities	2	30	243	25991	7.13059	0.0318894	0.164807	RPTOR,PIK3R1
WP	Pos	PC1	M39462	Wp arrhythmogenic right ventricular cardiomyopathy	3	74	243	25991	4.33617	0.0321993	0.165022	ITGA9,TCF7,ACTN1
WP	Pos	PC1	M39693	Wp ebola virus pathway on host	4	129	243	25991	3.31655	0.0331743	0.167947	PIK3R1,MAPK1,NFKB1,ACTN1
WP	Pos	PC1	M39696	Wp peptide gpcrs	3	75	243	25991	4.27835	0.0333163	0.167947	CXCR6,CCR7,OPRM1
WP	Pos	PC1	M39458	Wp ovarian infertility genes	2	32	243	25991	6.68493	0.0359228	0.175337	ATM,PRLR
WP	Pos	PC1	M39560	Wp il17 signaling pathway	2	32	243	25991	6.68493	0.0359228	0.175337	NFKB1,MAPK1
WP	Pos	PC1	M39573	Wp tolllike receptor signaling related to myd88	2	32	243	25991	6.68493	0.0359228	0.175337	NFKB1,MAPK1
WP	Pos	PC1	M39641	Wp inflammatory response pathway	2	32	243	25991	6.68493	0.0359228	0.175337	ZAP70,LCK
WP	Pos	PC1	M39745	Wp resistin as a regulator of inflammation	2	33	243	25991	6.48235	0.0380094	0.182623	NFKB1,MAPK1
WP	Pos	PC1	M39893	Wp regucalcin in proximal tubule epithelial kidney cells	2	33	243	25991	6.48235	0.0380094	0.182623	MAPK1,PRKCQ
WP	Pos	PC1	M39490	Wp dna irdamage and cellular response via atr	3	80	243	25991	4.01096	0.0391994	0.186881	ATM,RPA1,E2F1
WP	Pos	PC1	M39503	Wp alpha 6 beta 4 signaling pathway	2	34	243	25991	6.2917	0.0401412	0.189899	PIK3R1,MAPK1
WP	Pos	PC1	M39839	Wp egfr tyrosine kinase inhibitor resistance	3	83	243	25991	3.86598	0.0429653	0.201707	BCL2,MAPK1,PIK3R1
WP	Pos	PC1	M39363	Wp type ii interferon signaling ifng	2	36	243	25991	5.94216	0.0445365	0.204773	TAP1,IRF1
WP	Pos	PC1	M39521	Wp initiation of transcription and translation elongation at the hiv1 ltr	2	36	243	25991	5.94216	0.0445365	0.204773	NFKB1,NFATC2
WP	Pos	PC1	M39575	Wp ectoderm differentiation	4	142	243	25991	3.01293	0.0446172	0.204773	RAB8B,PDE7A,GLB1,FYN
WP	Pos	PC1	M39621	Wp tca cycle nutrient utilization and invasiveness of ovarian cancer	1	5	243	25991	21.3918	0.0458844	0.209029	MAPK1
WP	Pos	PC1	M39569	Wp factors and pathways affecting insulinlike growth factor igf1akt signaling	2	37	243	25991	5.78156	0.046798	0.209036	NFKB1,RPTOR
WP	Pos	PC1	M39635	Wp target of rapamycin tor signaling	2	37	243	25991	5.78156	0.046798	0.209036	RPTOR,PRR5L
WP	Pos	PC1	M39524	Wp mirna regulation of dna damage response	3	86	243	25991	3.73112	0.0469056	0.209036	ATM,E2F1,CCND3
WP	Pos	PC2	M39725	Wp tcell antigen receptor tcr signaling pathway	8	90	287	25975	8.04491	7.13257e-06	0.00438653	CD247,PRKCQ,LCK,PSTPIP1,PTK2B,FYN,FYB1,ITK
WP	Pos	PC2	M39536	Wp il2 signaling pathway	5	42	287	25975	10.7744	9.6805e-05	0.0297675	BCL2,LCK,PTK2B,FYN,STAT5B
WP	Pos	PC2	M39566	Wp regulation of microtubule cytoskeleton	5	47	287	25975	9.62822	0.000166875	0.0322294	TRIO,PTPRA,MARK2,TIAM1,DIAPH1
WP	Pos	PC2	M39899	Wp intracellular trafficking proteins involved in cmt neuropathy	4	27	287	25975	13.4082	0.000209622	0.0322294	RAB7A,LITAF,RAB11B,DNM2
WP	Pos	PC2	M39429	Wp tcell antigen receptor tcr pathway during staphylococcus aureus infection	5	62	287	25975	7.29881	0.000615233	0.0630614	PRKCQ,PTPRC,LCK,FYN,ITK
WP	Pos	PC2	M39508	Wp tyrobp causal network	5	62	287	25975	7.29881	0.000615233	0.0630614	APBB1IP,TNFRSF1B,LHFPL2,ITGB2,IL10RA
WP	Pos	PC2	M39818	Wp il18 signaling pathway	10	274	287	25975	3.30311	0.00100462	0.0882628	BCL2,FASLG,SPON1,RPTOR,TNFRSF1A,RASA3,SNTB1,ZC3H12A,LCK,MBTPS1
WP	Pos	PC2	M39876	Wp pathogenesis of sarscov2 mediated by nsp9nsp10 complex	3	21	287	25975	12.9293	0.00153194	0.112644	CD247,FYN,LCK
WP	Pos	PC2	M39402	Wp focal adhesion	8	199	287	25975	3.6384	0.00173508	0.112644	BCL2,VWF,PXN,ARHGAP35,ACTN4,DIAPH1,TXK,FYN
WP	Pos	PC2	M39878	Wp unfolded protein response	3	24	287	25975	11.3132	0.00227499	0.112644	BCL2,NFE2L2,MBTPS1
WP	Pos	PC2	M39438	Wp photodynamic therapyinduced ap1 survival signaling	4	51	287	25975	7.09845	0.00242529	0.112644	BCL2,FASLG,TNFRSF1A,NFE2L2
WP	Pos	PC2	M39400	Wp chemokine signaling pathway	7	165	287	25975	3.83962	0.00246532	0.112644	PXN,PTK2B,TIAM1,STAT5B,ITK,GRK6,ADCY3
WP	Pos	PC2	M39654	Wp apoptosis	5	85	287	25975	5.32384	0.00253916	0.112644	BCL2,FASLG,CASP1,TNFRSF1A,TNFRSF1B
WP	Pos	PC2	M39499	Wp il7 signaling pathway	3	25	287	25975	10.8606	0.00256426	0.112644	PTK2B,FYN,STAT5B
WP	Pos	PC2	M39763	Wp phosphodiesterases in neuronal function	4	53	287	25975	6.83058	0.00279337	0.114528	PDE4D,PDE8A,PDE9A,ADCY3
WP	Pos	PC2	M39435	Wp interferon type i signaling pathways	4	54	287	25975	6.70409	0.002991	0.114966	PTPRC,RPTOR,LCK,FYN
WP	Pos	PC2	M39419	Wp dual hijack model of vif in hiv infection	2	8	287	25975	22.6263	0.00326004	0.117937	RUNX1,CBFB
WP	Pos	PC2	M39664	Wp apoptosis modulation and signaling	5	92	287	25975	4.91876	0.00357685	0.121261	BCL2,FASLG,CASP1,TNFRSF1A,TNFRSF1B
WP	Pos	PC2	M39426	Wp g protein signaling pathways	5	94	287	25975	4.81411	0.00392209	0.121261	PDE4D,PDE8A,PRKCH,PRKCQ,ADCY3
WP	Pos	PC2	M39632	Wp tcell receptor and costimulatory signaling	3	29	287	25975	9.36261	0.00394345	0.121261	LCK,FYN,ITK
WP	Pos	PC2	M39481	Wp ethanol metabolism resulting in production of ros by cyp2e1	2	10	287	25975	18.101	0.00516341	0.135664	NFE2L2,PRKCQ
WP	Pos	PC2	M39641	Wp inflammatory response pathway	3	32	287	25975	8.48486	0.00522415	0.135664	LCK,TNFRSF1A,TNFRSF1B
WP	Pos	PC2	M39691	Wp brainderived neurotrophic factor bdnf signaling pathway	6	144	287	25975	3.77105	0.0054052	0.135664	NCK2,PTK2B,TIAM1,STAT5B,KCNA3,FYN
WP	Pos	PC2	M39646	Wp endochondral ossification	4	64	287	25975	5.65658	0.00551478	0.135664	CHST11,HDAC4,SOX6,STAT5B
WP	Pos	PC2	M39884	Wp endochondral ossification with skeletal dysplasias	4	64	287	25975	5.65658	0.00551478	0.135664	CHST11,HDAC4,SOX6,STAT5B
WP	Pos	PC2	M39562	Wp oncostatin m signaling pathway	4	66	287	25975	5.48517	0.00614928	0.145454	PRKCH,PXN,PTK2B,STAT5B
WP	Pos	PC2	M40047	Wp camkk2 pathway	3	35	287	25975	7.75759	0.00672803	0.15325	RPTOR,HDAC4,NFE2L2
WP	Pos	PC2	M39430	Wp overview of leukocyteintrinsic hippo pathway functions	3	36	287	25975	7.5421	0.00728051	0.154397	RASSF5,STK38L,FYB1
WP	Pos	PC2	M39636	Wp prion disease pathway	3	36	287	25975	7.5421	0.00728051	0.154397	BCL2,FYN,RAD21
WP	Pos	PC2	M39475	Wp myometrial relaxation and contraction pathways	6	156	287	25975	3.48097	0.00790172	0.157579	PDE4D,PRKCH,GRK6,PRKCQ,GSTO1,ADCY3
WP	Pos	PC2	M39568	Wp nongenomic actions of 125 dihydroxyvitamin d3	4	71	287	25975	5.09889	0.00794303	0.157579	PRKCH,TNFRSF1A,ETS1,PRKCQ
WP	Pos	PC2	M39357	Wp amyotrophic lateral sclerosis als	3	38	287	25975	7.14515	0.00846403	0.162668	BCL2,CASP1,TNFRSF1A
WP	Pos	PC2	M39334	Wp egfegfr signaling pathway	6	162	287	25975	3.35205	0.00942066	0.175567	STAM,SH3KBP1,NCK2,PTK2B,STAT5B,EPS15L1
WP	Pos	PC2	M39673	Wp fas ligand fasl pathway and stress induction of heat shock proteins hsp regulation	3	43	287	25975	6.31432	0.0118923	0.215112	BCL2,FASLG,LMNB1
WP	Pos	PC2	M39474	Wp glycolysis and gluconeogenesis	3	45	287	25975	6.03368	0.0134556	0.231523	PKM,HK2,LDHC
WP	Pos	PC2	M39380	Wp thymic stromal lymphopoietin tslp signaling pathway	3	46	287	25975	5.90251	0.0142791	0.231523	LCK,FYN,STAT5B
WP	Pos	PC2	M39828	Wp envelope proteins and their potential roles in edmd physiopathology	3	46	287	25975	5.90251	0.0142791	0.231523	YY1AP1,PLEC,ADCY3
WP	Pos	PC2	M39733	Wp cells and molecules involved in local acute inflammatory response	2	17	287	25975	10.6477	0.0148308	0.231523	SELPLG,ITGB2
WP	Pos	PC2	M39776	Wp viral acute myocarditis	4	86	287	25975	4.20955	0.0152773	0.231523	BCL2,CASP1,ITGB2,FYN
WP	Pos	PC2	M39375	Wp pathways in clear cell renal cell carcinoma	4	87	287	25975	4.16116	0.0158781	0.231523	HK2,RPTOR,PKM,LDHC
WP	Pos	PC2	M39661	Wp aryl hydrocarbon receptor netpath	3	48	287	25975	5.65658	0.01601	0.231523	AIP,KLF6,NFE2L2
WP	Pos	PC2	M39722	Wp il3 signaling pathway	3	48	287	25975	5.65658	0.01601	0.231523	BCL2,FYN,STAT5B
WP	Pos	PC2	M39737	Wp inhibition of exosome biogenesis and secretion by manumycin a in crpc cells	2	18	287	25975	10.0561	0.0165642	0.231523	RAB27A,HNRNPH1
WP	Pos	PC2	M39808	Wp mfap5 effect on permeability and motility of endothelial cells via cytoskeleton rearrangement	2	18	287	25975	10.0561	0.0165642	0.231523	PXN,PRKCQ
WP	Pos	PC2	M39450	Wp apoptosis modulation by hsp70	2	19	287	25975	9.52687	0.0183795	0.245726	TNFRSF1A,FASLG
WP	Pos	PC2	M39865	Wp proteoglycan biosynthesis	2	19	287	25975	9.52687	0.0183795	0.245726	CHSY1,CSGALNACT1
WP	Pos	PC2	M39479	Wp nanomaterial induced apoptosis	2	20	287	25975	9.05052	0.0202746	0.265295	BCL2,FASLG
WP	Pos	PC2	M39575	Wp ectoderm differentiation	5	142	287	25975	3.1868	0.0209614	0.268568	ZBTB2,BCAS3,FYN,CCDC88C,ZBTB16
WP	Pos	PC2	M39902	Wp hostpathogen interaction of human corona viruses apoptosis	2	21	287	25975	8.61955	0.0222475	0.279229	BCL2,FASLG
WP	Pos	PC2	M39323	Wp b cell receptor signaling pathway	4	97	287	25975	3.73217	0.0227081	0.27931	PTPRC,LCK,ETS1,FYN
WP	Pos	PC2	M39520	Wp regulation of actin cytoskeleton	5	149	287	25975	3.03709	0.025164	0.303448	PXN,PIP4K2A,ARHGAP35,SSH3,DIAPH1
WP	Pos	PC2	M39761	Wp nrf2are regulation	2	23	287	25975	7.87002	0.0264191	0.306561	NFE2L2,FYN
WP	Pos	PC2	M39821	Wp hippoyap signaling pathway	2	23	287	25975	7.87002	0.0264191	0.306561	STK38L,YY1AP1
WP	Pos	PC2	M39801	Wp hepatitis b infection	5	154	287	25975	2.93848	0.0284745	0.321746	TGFBR2,BCL2,FASLG,PTK2B,STAT5B
WP	Pos	PC2	M39350	Wp kit receptor signaling pathway	3	60	287	25975	4.52526	0.028774	0.321746	BCL2,FYN,STAT5B
WP	Pos	PC2	M39687	Wp epo receptor signaling	2	26	287	25975	6.96194	0.0332129	0.364749	STAT5B,PTPRC
WP	Pos	PC2	M39866	Wp gastrin signaling pathway	4	114	287	25975	3.17562	0.037898	0.403764	PXN,PRKCH,PRKCQ,FYN
WP	Pos	PC2	M39347	Wp gastric cancer network 1	2	28	287	25975	6.46466	0.0380785	0.403764	RNF216,SMOC2
WP	Pos	PC2	M39516	Wp extracellular vesiclemediated signaling in recipient cells	2	30	287	25975	6.03368	0.0431971	0.44277	TGFBR2,TGFA
WP	Pos	PC2	M39792	Wp cell migration and invasion through p75ntr	2	30	287	25975	6.03368	0.0431971	0.44277	TRIO,TIAM1
WP	Pos	PC2	M39401	Wp mecp2 and associated rett syndrome	3	72	287	25975	3.77105	0.0455862	0.443948	HNRNPH1,HNRNPF,FKBP5
WP	Pos	PC2	M39738	Wp nonsmall cell lung cancer	3	72	287	25975	3.77105	0.0455862	0.443948	RASSF5,TGFA,STAT5B
WP	Pos	PC2	M39714	Wp ethanol effects on histone modifications	2	31	287	25975	5.83905	0.0458471	0.443948	ACSS2,HDAC4
WP	Pos	PC2	M39364	Wp development and heterogeneity of the ilc family	2	32	287	25975	5.65658	0.0485553	0.443948	RORA,ZBTB16
WP	Pos	PC2	M39403	Wp primary focal segmental glomerulosclerosis fsgs	3	74	287	25975	3.66913	0.0487706	0.443948	UTRN,FYN,ACTN4
WP	Pos	PC3	M39725	Wp tcell antigen receptor tcr signaling pathway	15	90	237	25994	18.2799	4.00146e-15	2.4609e-12	NFATC1,PLCG1,MALT1,CD3D,LAT,CD3E,CD3G,NFKB1,GRAP2,OPRM1,PSTPIP1,FYB1,CD28,ICOS,CBL
WP	Pos	PC3	M39429	Wp tcell antigen receptor tcr pathway during staphylococcus aureus infection	11	62	237	25994	19.4592	9.68559e-12	2.97832e-09	PLCG1,PTPN6,MALT1,LAT,CD3D,NFKB1,GRAP2,CTLA4,CD28,ICOS,CBL
WP	Pos	PC3	M39632	Wp tcell receptor and costimulatory signaling	6	29	237	25994	22.6923	2.14894e-07	4.40533e-05	NFKB1,PLCG1,PTPN6,CTLA4,CD28,RASGRP1
WP	Pos	PC3	M39843	Wp cancer immunotherapy by pd1 blockade	5	23	237	25994	23.8433	1.77744e-06	0.000273281	NFKB1,NFATC1,CD3D,CD3E,CD3G
WP	Pos	PC3	M39773	Wp vitamin d in inflammatory diseases	4	22	237	25994	19.9417	4.33141e-05	0.00532763	NFKB1,SMAD3,NFATC1,NR3C1
WP	Pos	PC3	M39351	Wp tgfbeta receptor signaling	5	57	237	25994	9.62099	0.000171869	0.0176166	TGFBR2,LEF1,NFKB1,SKI,SMAD3
WP	Pos	PC3	M39886	Wp tgfbeta receptor signalling in skeletal dysplasias	5	61	237	25994	8.99011	0.000237083	0.0182322	TGFBR2,LEF1,NFKB1,SKI,SMAD3
WP	Pos	PC3	M39840	Wp cancer immunotherapy by ctla4 blockade	3	14	237	25994	23.5027	0.000252908	0.0182322	CTLA4,CD28,PTPN6
WP	Pos	PC3	M39323	Wp b cell receptor signaling pathway	6	97	237	25994	6.78429	0.000266812	0.0182322	PTPN6,MALT1,PLCG1,ETS1,NFKB1,CBL
WP	Pos	PC3	M39764	Wp ras signaling	8	184	237	25994	4.76867	0.000299482	0.0184182	PLA2G6,ABL2,TIAM1,RASGRP1,PLCG1,LAT,ETS1,NFKB1
WP	Pos	PC3	M39786	Wp interactions between immune cells and micrornas in tumor microenvironment	4	39	237	25994	11.2492	0.000431317	0.0237291	NFKB1,TGFBR2,CTLA4,IL4R
WP	Pos	PC3	M39512	Wp ncrnas involved in stat3 signaling in hepatocellular carcinoma	3	17	237	25994	19.3552	0.000463007	0.0237291	NFKB1,IL6ST,IL6R
WP	Pos	PC3	M39758	Wp chromosomal and microsatellite instability in colorectal cancer	5	73	237	25994	7.51228	0.000547864	0.0259182	TGFBR2,LEF1,AXIN2,SMAD3,TCF7
WP	Pos	PC3	M39876	Wp pathogenesis of sarscov2 mediated by nsp9nsp10 complex	3	21	237	25994	15.6685	0.000881534	0.0387245	CD2,CD3E,CD3G
WP	Pos	PC3	M39413	Wp hepatitis c and hepatocellular carcinoma	4	50	237	25994	8.77435	0.00111673	0.045786	IL6R,LEF1,NFKB1,SMAD3
WP	Pos	PC3	M39465	Wp hair follicle development cytodifferentiation part 3 of 3	5	89	237	25994	6.16176	0.00134587	0.0517318	NFATC1,NR3C1,BCL11B,LEF1,NFKB1
WP	Pos	PC3	M39667	Wp ranklrank receptor activator of nfkb ligand signaling pathway	4	55	237	25994	7.97668	0.0015961	0.0539383	NFATC1,PLCG1,NFKB1,CBL
WP	Pos	PC3	M39720	Wp il4 signaling pathway	4	55	237	25994	7.97668	0.0015961	0.0539383	PTPN6,IL4R,NFKB1,CBL
WP	Pos	PC3	M39407	Wp wntbetacatenin signaling pathway in leukemia	3	26	237	25994	12.6553	0.00166639	0.0539383	AXIN2,RARA,LEF1
WP	Pos	PC3	M39591	Wp endoderm differentiation	6	144	237	25994	4.56997	0.00211256	0.0647474	RGS10,ATP8B2,SMAD3,TCF7,NR3C1,LEF1
WP	Pos	PC3	M39729	Wp vegfavegfr2 signaling pathway	11	433	237	25994	2.78631	0.00221089	0.0647474	NFATC1,CAPZB,ETS1,NFKB1,CBL,PTPN6,SET,PLCG1,EEA1,MICAL2,TPM3
WP	Pos	PC3	M39333	Wp white fat cell differentiation	3	33	237	25994	9.97085	0.00333666	0.0892193	NR3C1,RARA,TLE3
WP	Pos	PC3	M39455	Wp mammary gland development pathway pregnancy and lactation stage 3 of 4	3	33	237	25994	9.97085	0.00333666	0.0892193	TTC9,NR3C1,TPM3
WP	Pos	PC3	M39569	Wp factors and pathways affecting insulinlike growth factor igf1akt signaling	3	37	237	25994	8.89292	0.00462647	0.118553	NFKB1,RPTOR,SMAD3
WP	Pos	PC3	M39555	Wp pdgf pathway	3	39	237	25994	8.43687	0.00536947	0.132089	NFKB1,PLCG1,TIAM1
WP	Pos	PC3	M39793	Wp control of immune tolerance by vasoactive intestinal peptide	2	13	237	25994	16.8737	0.00604296	0.142939	CTLA4,CD28
WP	Pos	PC3	M39693	Wp ebola virus pathway on host	5	129	237	25994	4.25114	0.00666142	0.151732	HLA-E,TIAM1,NFKB1,TOP1,ACTN1
WP	Pos	PC3	M39432	Wp tgfbeta signaling pathway	5	133	237	25994	4.12328	0.00755572	0.165956	TGFBR2,SKI,SMAD3,SMURF1,ETS1
WP	Pos	PC3	M39732	Wp pancreatic adenocarcinoma pathway	4	88	237	25994	4.98542	0.00864521	0.183338	TGFBR2,NFKB1,SMAD3,TIAM1
WP	Pos	PC3	M39566	Wp regulation of microtubule cytoskeleton	3	47	237	25994	7.00081	0.0090327	0.18517	TRIO,CAMK4,TIAM1
WP	Pos	PC3	M39443	Wp amplification and expansion of oncogenic pathways as metastatic traits	2	17	237	25994	12.9034	0.010287	0.197703	LEF1,TCF7
WP	Pos	PC3	M39686	Wp canonical and noncanonical tgfb signaling	2	17	237	25994	12.9034	0.010287	0.197703	TGFBR2,SMAD3
WP	Pos	PC3	M39808	Wp mfap5 effect on permeability and motility of endothelial cells via cytoskeleton rearrangement	2	18	237	25994	12.1866	0.0115039	0.21439	PLCG1,ACTN1
WP	Pos	PC3	M39435	Wp interferon type i signaling pathways	3	54	237	25994	6.0933	0.0131902	0.238588	PTPN6,RPTOR,CBL
WP	Pos	PC3	M39546	Wp mesodermal commitment pathway	5	154	237	25994	3.56102	0.0136466	0.23979	RGS10,ATP8B2,AXIN2,SMAD3,LEF1
WP	Pos	PC3	M39467	Wp globo sphingolipid metabolism	2	21	237	25994	10.4456	0.0155094	0.264952	ST3GAL1,ST6GAL1
WP	Pos	PC3	M39750	Wp met in type 1 papillary renal cell carcinoma	3	58	237	25994	5.67307	0.0159799	0.265612	PLCG1,ETS1,CBL
WP	Pos	PC3	M39877	Wp the overlap between signal transduction pathways that contribute to a range of lmna laminopathies	3	59	237	25994	5.57691	0.0167251	0.270682	LEF1,SMAD3,TCF7
WP	Pos	PC3	M39350	Wp kit receptor signaling pathway	3	60	237	25994	5.48397	0.0174894	0.275795	PLCG1,PTPN6,CBL
WP	Pos	PC3	M39492	Wp dna damage response only atm dependent	4	111	237	25994	3.95241	0.0189034	0.29064	SMAD3,TCF7,LEF1,NFKB1
WP	Pos	PC3	M39623	Wp endometrial cancer	3	63	237	25994	5.22282	0.0198979	0.298468	LEF1,AXIN2,TCF7
WP	Pos	PC3	M39713	Wp hypothesized pathways in pathogenesis of cardiovascular disease	2	25	237	25994	8.77435	0.0216348	0.316795	TGFBR2,SMAD3
WP	Pos	PC3	M40067	Wp sarscov2 innate immunity evasion and cellspecific immune response	3	68	237	25994	4.83879	0.0242978	0.347516	IL6R,NFKB1,SMAD3
WP	Pos	PC3	M39545	Wp canonical and noncanonical notch signaling	2	27	237	25994	8.12439	0.0250138	0.349625	MAML2,LEF1
WP	Pos	PC3	M39347	Wp gastric cancer network 1	2	28	237	25994	7.83424	0.0267786	0.361613	CENPF,RNF216
WP	Pos	PC3	M39676	Wp cannabinoid receptor signaling	2	29	237	25994	7.56409	0.0285921	0.361613	DAGLB,CNR2
WP	Pos	PC3	M39797	Wp selective expression of chemokine receptors during tcell polarization	2	29	237	25994	7.56409	0.0285921	0.361613	CD28,IL4R
WP	Pos	PC3	M39462	Wp arrhythmogenic right ventricular cardiomyopathy	3	74	237	25994	4.44646	0.030214	0.361613	LEF1,TCF7,ACTN1
WP	Pos	PC3	M39516	Wp extracellular vesiclemediated signaling in recipient cells	2	30	237	25994	7.31195	0.0304535	0.361613	TGFBR2,SMAD3
WP	Pos	PC3	M39792	Wp cell migration and invasion through p75ntr	2	30	237	25994	7.31195	0.0304535	0.361613	TRIO,TIAM1
WP	Pos	PC3	M39857	Wp head and neck squamous cell carcinoma	3	75	237	25994	4.38717	0.0312671	0.361613	TGFBR2,NFKB1,RPTOR
WP	Pos	PC3	M40057	Wp 16p112 proximal deletion syndrome	3	75	237	25994	4.38717	0.0312671	0.361613	NR3C1,NFKB1,KMT2C
WP	Pos	PC3	M39505	Wp adipogenesis	4	130	237	25994	3.37475	0.0314195	0.361613	SMAD3,NR3C1,IL6ST,RARA
WP	Pos	PC3	M39601	Wp prolactin signaling pathway	3	76	237	25994	4.32945	0.0323394	0.361613	PTPN6,NFKB1,CBL
WP	Pos	PC3	M39824	Wp regulatory circuits of the stat3 signaling pathway	3	76	237	25994	4.32945	0.0323394	0.361613	IL6ST,IL6R,RPTOR
WP	Pos	PC3	M39364	Wp development and heterogeneity of the ilc family	2	32	237	25994	6.85496	0.0343155	0.370246	IL23A,BCL11B
WP	Pos	PC3	M39641	Wp inflammatory response pathway	2	32	237	25994	6.85496	0.0343155	0.370246	IL4R,CD28
WP	Pos	PC3	M40041	Wp hair follicle development organogenesis part 2 of 3	2	33	237	25994	6.64723	0.0363141	0.378528	NFKB1,LEF1
WP	Pos	PC3	M39745	Wp resistin as a regulator of inflammation	2	33	237	25994	6.64723	0.0363141	0.378528	NFKB1,PLCG1
WP	Pos	PC3	M39756	Wp the effect of progerin on the involved genes in hutchinsongilford progeria syndrome	2	34	237	25994	6.45172	0.0383565	0.393154	CHD3,LEF1
WP	Pos	PC3	M40047	Wp camkk2 pathway	2	35	237	25994	6.26739	0.0404418	0.407733	RPTOR,CAMK4
WP	Pos	PC3	M39521	Wp initiation of transcription and translation elongation at the hiv1 ltr	2	36	237	25994	6.0933	0.042569	0.414534	NFKB1,NFATC1
WP	Pos	PC3	M39636	Wp prion disease pathway	2	36	237	25994	6.0933	0.042569	0.414534	NFKB1,BCL11A
WP	Pos	PC3	M39691	Wp brainderived neurotrophic factor bdnf signaling pathway	4	144	237	25994	3.04665	0.0431384	0.414534	CAMK4,TIAM1,PLCG1,NFKB1
WP	Pos	PC3	M39506	Wp neovascularisation processes	2	37	237	25994	5.92861	0.0447371	0.417148	NFKB1,SMAD3
WP	Pos	PC3	M39671	Wp sulindac metabolic pathway	1	5	237	25994	21.9359	0.0447671	0.417148	MSRB2
WP	Pos	PC3	M39398	Wp allograft rejection	3	89	237	25994	3.69706	0.0479883	0.421284	HLA-E,CTLA4,CD28
WP	Pos	PC3	M39734	Wp ciliary landscape	5	217	237	25994	2.52717	0.0491725	0.421284	IFT140,MAEA,CDH23,NFKB1,CDR2
WP	Pos	PC3	M39657	Wp nuclear receptors	2	39	237	25994	5.62458	0.0491926	0.421284	NR3C1,RARA
WP	Pos	PC3	M39798	Wp neural crest cell migration during development	2	39	237	25994	5.62458	0.0491926	0.421284	TRIO,TIAM1
WP	Pos	PC3	M39817	Wp the influence of laminopathies on wnt signaling	2	39	237	25994	5.62458	0.0491926	0.421284	LEF1,TCF7
WP	Pos	PC3	M39715	Wp erbb signaling pathway	3	90	237	25994	3.65598	0.049321	0.421284	PLCG1,ABL2,CBL
WP	Neg	PC1	M39329	Wp calcium regulation in the cardiac cell	6	152	278	25975	3.68823	0.00601614	0.873288	ADCY9,FXYD2,CACNA1C,PRKCZ,CASQ2,ADCY2
WP	Neg	PC1	M39746	Wp thermogenesis	5	108	278	25975	4.32571	0.00616943	0.873288	ADCY9,PRKAG2,ACSL1,ZNF516,ADCY2
WP	Neg	PC1	M40042	Wp glucocorticoid receptor pathway	4	70	278	25975	5.33916	0.00677161	0.873288	ALOX5AP,RXRA,NAV3,SCNN1A
WP	Neg	PC1	M39738	Wp nonsmall cell lung cancer	4	72	278	25975	5.19085	0.00747321	0.873288	RXRA,E2F3,PIK3R3,EML4
WP	Neg	PC1	M39768	Wp ferroptosis	3	40	278	25975	7.00764	0.00894643	0.873288	NCOA4,ATG7,ACSL1
WP	Neg	PC1	M39698	Wp nucleotidebinding oligomerization domain nod pathway	3	41	278	25975	6.83673	0.00957755	0.873288	MEFV,NLRP3,NLRC4
WP	Neg	PC1	M39849	Wp major receptors targeted by epinephrine and norepinephrine	2	15	278	25975	12.458	0.0109318	0.873288	ADCY9,ADCY2
WP	Neg	PC1	M39864	Wp nephrotic syndrome	3	45	278	25975	6.22902	0.0123571	0.873288	E2F3,CUBN,ACTN4
WP	Neg	PC1	M39375	Wp pathways in clear cell renal cell carcinoma	4	87	278	25975	4.29587	0.0142864	0.873288	KSR1,HK2,HK1,SETD2
WP	Neg	PC1	M39405	Wp genes targeted by mirnas in adipocytes	2	18	278	25975	10.3817	0.0155971	0.873288	ERG,KCNE1
WP	Neg	PC1	M39822	Wp synaptic signaling pathways associated with autism spectrum disorder	3	51	278	25975	5.49619	0.0173074	0.873288	CACNA1C,PRKAG2,PIK3R3
WP	Neg	PC1	M39865	Wp proteoglycan biosynthesis	2	19	278	25975	9.83529	0.0173103	0.873288	XYLT1,CHSY1
WP	Neg	PC1	M39763	Wp phosphodiesterases in neuronal function	3	53	278	25975	5.28879	0.0191689	0.873288	PDE6A,ADCY9,ADCY2
WP	Neg	PC1	M39323	Wp b cell receptor signaling pathway	4	97	278	25975	3.853	0.0204849	0.873288	INPP5D,PIK3AP1,E2F3,MAP2K6
WP	Neg	PC1	M39362	Wp glycerolipids and glycerophospholipids	2	22	278	25975	8.49411	0.0228983	0.873288	GPAT4,PLD1
WP	Neg	PC1	M39773	Wp vitamin d in inflammatory diseases	2	22	278	25975	8.49411	0.0228983	0.873288	RXRA,MAP2K6
WP	Neg	PC1	M39806	Wp nonalcoholic fatty liver disease	5	153	278	25975	3.05344	0.0246709	0.873288	RXRA,PRKAG2,ERN1,PIK3R3,VMP1
WP	Neg	PC1	M39579	Wp preimplantation embryo	3	60	278	25975	4.67176	0.0265231	0.873288	MTA3,AQP9,MXD1
WP	Neg	PC1	M39325	Wp nanoparticle triggered autophagic cell death	2	24	278	25975	7.78627	0.0269796	0.873288	VMP1,ATG7
WP	Neg	PC1	M39482	Wp insulin signaling	5	160	278	25975	2.91985	0.0291673	0.895794	SGK3,MAP2K6,PRKCZ,SGK1,PIK3R3
WP	Neg	PC1	M39400	Wp chemokine signaling pathway	5	165	278	25975	2.83137	0.0326764	0.895794	ADCY9,PRKCZ,DOCK2,PIK3R3,ADCY2
WP	Neg	PC1	M39630	Wp ampactivated protein kinase ampk signaling	3	68	278	25975	4.12214	0.0365188	0.895794	PRKAG2,PIK3R3,CAMKK2
WP	Neg	PC1	M39684	Wp human thyroid stimulating hormone tsh signaling pathway	3	68	278	25975	4.12214	0.0365188	0.895794	PLD1,MAP2K6,ADCY2
WP	Neg	PC1	M39341	Wp spinal cord injury	4	119	278	25975	3.14068	0.0392338	0.895794	AIF1,SELP,CHST11,XYLT1
WP	Neg	PC1	M39568	Wp nongenomic actions of 125 dihydroxyvitamin d3	3	71	278	25975	3.94797	0.0406983	0.895794	PRKCZ,RXRA,CAMP
WP	Neg	PC1	M39501	Wp sphingolipid pathway	2	30	278	25975	6.22902	0.0407841	0.895794	GBA,CERS6
WP	Neg	PC1	M39592	Wp glycerophospholipid biosynthetic pathway	2	30	278	25975	6.22902	0.0407841	0.895794	GPAT4,PI4K2A
WP	Neg	PC1	M39904	Wp autophagy	2	30	278	25975	6.22902	0.0407841	0.895794	PRKAG2,ATG7
WP	Neg	PC1	M39395	Wp sterol regulatory elementbinding proteins srebp signalling	3	73	278	25975	3.8398	0.0436129	0.924895	PRKAG2,CAMP,SEC23B
WP	Neg	PC1	M39718	Wp vitamin d receptor pathway	5	184	278	25975	2.539	0.0483415	0.959095	RXRA,MXD1,TRAK1,CAMP,MYO9B
WP	Neg	PC2	M40056	Wp 16p112 distal deletion syndrome	5	26	273	25966	18.2911	6.79873e-06	0.00266887	CD19,CD81,CD82,VAV2,SDCCAG8
WP	Neg	PC2	M39323	Wp b cell receptor signaling pathway	8	97	273	25966	7.84442	8.67924e-06	0.00266887	INPP5D,BLK,CARD11,BLNK,CD19,VAV2,SYK,CD81
WP	Neg	PC2	M39566	Wp regulation of microtubule cytoskeleton	4	47	273	25966	8.09477	0.00149445	0.306362	CLASP1,CLIP1,DPYSL2,LIMK1
WP	Neg	PC2	M39889	Wp ldlrad4 and what we know about it	2	8	273	25966	23.7784	0.0029576	0.454731	LDLRAD4,PMEPA1
WP	Neg	PC2	M39746	Wp thermogenesis	5	108	273	25966	4.40341	0.00573078	0.62664	PRKAG2,NPR1,CPT1A,MAPK13,CNR1
WP	Neg	PC2	M39475	Wp myometrial relaxation and contraction pathways	6	156	273	25966	3.65821	0.0062574	0.62664	GNG7,RGS6,ITPR1,MYL4,PRKCE,PKIG
WP	Neg	PC2	M39589	Wp celltype dependent selectivity of cck2r signaling	2	13	273	25966	14.6329	0.00795825	0.62664	ITPR1,CNR1
WP	Neg	PC2	M39400	Wp chemokine signaling pathway	6	165	273	25966	3.45867	0.00815141	0.62664	GNG7,CXCR5,CCR6,PARD3,VAV2,ELMO1
WP	Neg	PC2	M39338	Wp angiopoietin like protein 8 regulatory pathway	5	132	273	25966	3.60279	0.0129997	0.888309	PRKAG2,MAPK13,MAP4K2,SCD,MAPKAP1
WP	Neg	PC2	M39525	Wp regulation of wntbcatenin signaling by small molecule compounds	2	18	273	25966	10.5682	0.0150807	0.9089	TNKS,TCF4
WP	Neg	PC2	M39426	Wp g protein signaling pathways	4	94	273	25966	4.04739	0.0174312	0.9089	GNG7,PPP3CC,ITPR1,PRKCE
WP	Neg	PC2	M39691	Wp brainderived neurotrophic factor bdnf signaling pathway	5	144	273	25966	3.30255	0.0182868	0.9089	DPYSL2,KSR1,VAV2,CNR1,CRTC1
WP	Neg	PC2	M39467	Wp globo sphingolipid metabolism	2	21	273	25966	9.05843	0.0202761	0.9089	GALNT2,ST6GAL1
WP	Neg	PC2	M39704	Wp nad biosynthetic pathways	2	22	273	25966	8.64669	0.022151	0.9089	PARP1,TNKS
WP	Neg	PC2	M39329	Wp calcium regulation in the cardiac cell	5	152	273	25966	3.12874	0.022502	0.9089	GNG7,RGS6,ITPR1,PRKCE,PKIG
WP	Neg	PC2	M39546	Wp mesodermal commitment pathway	5	154	273	25966	3.0881	0.0236462	0.9089	ARID5B,CCDC6,TCF4,ADAM19,CRTC1
WP	Neg	PC2	M39736	Wp pi3kakt signaling pathway	8	341	273	25966	2.2314	0.0284843	1	GNG7,CD19,PHLPP2,ANGPT1,SYK,TCL1A,FGF6,PPP2R5C
WP	Neg	PC2	M39676	Wp cannabinoid receptor signaling	2	29	273	25966	6.55956	0.037111	1	CNR1,MAPK13
WP	Neg	PC2	M39852	Wp osteoblast differentiation	4	119	273	25966	3.19709	0.0371403	1	MAPK13,PRKCE,FGF6,LRP5
WP	Neg	PC2	M39568	Wp nongenomic actions of 125 dihydroxyvitamin d3	3	71	273	25966	4.01888	0.0389365	1	PRKCE,OAS2,MAPK13
WP	Neg	PC2	M39804	Wp fragile x syndrome	4	122	273	25966	3.11848	0.0401099	1	CPT1A,ITPR1,CNR1,ALDH3A2
WP	Neg	PC2	M39719	Wp focal adhesionpi3kaktmtorsignaling pathway	7	305	273	25966	2.18293	0.0431281	1	GNG7,PHLPP2,ANGPT1,TCL1A,FGF6,PPP2R5C,COL11A2
WP	Neg	PC2	M39718	Wp vitamin d receptor pathway	5	184	273	25966	2.58461	0.0454048	1	CD9,CLMN,LRP5,CDKAL1,PNOC
WP	Neg	PC2	M39824	Wp regulatory circuits of the stat3 signaling pathway	3	76	273	25966	3.75448	0.0461196	1	IL10RB,MAPKAP1,MAPK13
WP	Neg	PC2	M39870	Wp type i collagen synthesis in the context of osteogenesis imperfecta	2	33	273	25966	5.76446	0.0469656	1	LRP5,ITPR1
WP	Neg	PC3	M39886	Wp tgfbeta receptor signalling in skeletal dysplasias	7	61	267	25990	11.1703	3.03365e-06	0.0018657	TGFBR3,JAK1,THBS1,IFNG,FBN1,ZEB2,RUNX3
WP	Neg	PC3	M39351	Wp tgfbeta receptor signaling	6	57	267	25990	10.2464	2.59951e-05	0.00600757	TGFBR3,JAK1,THBS1,IFNG,ZEB2,RUNX3
WP	Neg	PC3	M39818	Wp il18 signaling pathway	12	274	267	25990	4.2631	2.93052e-05	0.00600757	FASLG,CCL18,TSHZ1,TBX21,IFNG,PHF20,IL18R1,IL18RAP,ELAVL1,PRKCB,MAPK1,APBA2
WP	Neg	PC3	M39725	Wp tcell antigen receptor tcr signaling pathway	7	90	267	25990	7.57095	4.03381e-05	0.00620198	VAV3,CD247,MAPK1,PRKCQ,FYN,ITPR1,ITK
WP	Neg	PC3	M39400	Wp chemokine signaling pathway	9	165	267	25990	5.3095	5.52987e-05	0.00668881	PREX1,FGR,FOXO3,CX3CR1,ITK,VAV3,PRKCB,MAPK1,GNG2
WP	Neg	PC3	M39323	Wp b cell receptor signaling pathway	7	97	267	25990	7.0246	6.52567e-05	0.00668881	PIK3AP1,PLCG2,PRKCB,MAPK1,SH3BP2,RAPGEF1,FYN
WP	Neg	PC3	M39568	Wp nongenomic actions of 125 dihydroxyvitamin d3	6	71	267	25990	8.22599	9.09969e-05	0.00799473	JAK1,PLCG2,PRKCB,MAPK1,PRKCQ,IFNG
WP	Neg	PC3	M39866	Wp gastrin signaling pathway	7	114	267	25990	5.97707	0.000180307	0.0138611	FOXO3,ELAVL1,TCF4,MAPK1,CD44,PRKCQ,FYN
WP	Neg	PC3	M39435	Wp interferon type i signaling pathways	5	54	267	25990	9.01304	0.00023107	0.0142108	JAK1,STAT4,RAPGEF1,RPS6KA5,FYN
WP	Neg	PC3	M39688	Wp apoptosisrelated network due to altered notch3 in ovarian cancer	5	54	267	25990	9.01304	0.00023107	0.0142108	RNF7,VAV3,THBS1,MAPK1,AXIN1
WP	Neg	PC3	M39350	Wp kit receptor signaling pathway	5	60	267	25990	8.11174	0.000379566	0.0212212	PRKCB,FOXO3,MAPK1,MATK,FYN
WP	Neg	PC3	M39484	Wp interactome of polycomb repressive complex 2 prc2	3	17	267	25990	17.1778	0.000655274	0.0324424	ELL,STK38,JARID2
WP	Neg	PC3	M39591	Wp endoderm differentiation	7	144	267	25990	4.73185	0.000742319	0.0324424	ELAVL1,TBX21,TCF4,CTBP2,CDYL,VAV3,JARID2
WP	Neg	PC3	M39808	Wp mfap5 effect on permeability and motility of endothelial cells via cytoskeleton rearrangement	3	18	267	25990	16.2235	0.000780379	0.0324424	MAPK1,ITPR1,PRKCQ
WP	Neg	PC3	M39619	Wp senescence and autophagy in cancer	6	107	267	25990	5.45836	0.000844612	0.0324424	ATG7,THBS1,ATG5,MAPK1,CD44,IFNG
WP	Neg	PC3	M39738	Wp nonsmall cell lung cancer	5	72	267	25990	6.75978	0.000879959	0.0324424	PLCG2,PRKCB,FOXO3,MAPK1,EML4
WP	Neg	PC3	M39536	Wp il2 signaling pathway	4	42	267	25990	9.27055	0.000896782	0.0324424	JAK1,FOXO3,MAPK1,FYN
WP	Neg	PC3	M39621	Wp tca cycle nutrient utilization and invasiveness of ovarian cancer	2	5	267	25990	38.9363	0.00103019	0.0351981	JAK1,MAPK1
WP	Neg	PC3	M39571	Wp notch signaling	4	45	267	25990	8.65252	0.00116534	0.0364562	RBPJ,NCOR2,CTBP2,MAML3
WP	Neg	PC3	M39475	Wp myometrial relaxation and contraction pathways	7	156	267	25990	4.36786	0.00118557	0.0364562	RGS6,ITPR1,PLCG2,PRKCB,CRCP,PRKCQ,GNG2
WP	Neg	PC3	M39380	Wp thymic stromal lymphopoietin tslp signaling pathway	4	46	267	25990	8.46442	0.00126613	0.0370795	STAT4,JAK1,MAPK1,FYN
WP	Neg	PC3	M39482	Wp insulin signaling	7	160	267	25990	4.25866	0.00137217	0.0378295	FOXO3,ARF1,RPS6KA5,PRKCB,MAPK1,PRKCQ,RAPGEF1
WP	Neg	PC3	M39490	Wp dna irdamage and cellular response via atr	5	80	267	25990	6.0838	0.00141476	0.0378295	UIMC1,BRIP1,HERC2,MCPH1,USP1
WP	Neg	PC3	M39722	Wp il3 signaling pathway	4	48	267	25990	8.11174	0.0014857	0.0380711	JAK1,MAPK1,RAPGEF1,FYN
WP	Neg	PC3	M39637	Wp signaling pathways in glioblastoma	5	83	267	25990	5.86391	0.0016667	0.0394239	PLCG2,PRKCB,FOXO3,MAPK1,PRKCQ
WP	Neg	PC3	M39839	Wp egfr tyrosine kinase inhibitor resistance	5	83	267	25990	5.86391	0.0016667	0.0394239	JAK1,PLCG2,PRKCB,FOXO3,MAPK1
WP	Neg	PC3	M39692	Wp triacylglyceride synthesis	3	24	267	25990	12.1676	0.00184955	0.0400887	AGPAT3,AGPAT4,GK2
WP	Neg	PC3	M39721	Wp wnt signaling pathway netpath	4	51	267	25990	7.63457	0.00186278	0.0400887	PRKCB,MAPK1,AXIN1,TCF4
WP	Neg	PC3	M39776	Wp viral acute myocarditis	5	86	267	25990	5.65935	0.0019501	0.0400887	JAK1,MAPK1,SGCG,IFNG,FYN
WP	Neg	PC3	M39499	Wp il7 signaling pathway	3	25	267	25990	11.6809	0.00208592	0.0400887	JAK1,MAPK1,FYN
WP	Neg	PC3	M39576	Wp physiological and pathological hypertrophy of the heart	3	25	267	25990	11.6809	0.00208592	0.0400887	PRKCB,MAPK1,PPP3CA
WP	Neg	PC3	M39713	Wp hypothesized pathways in pathogenesis of cardiovascular disease	3	25	267	25990	11.6809	0.00208592	0.0400887	TGFBR3,FBN1,MAPK1
WP	Neg	PC3	M39398	Wp allograft rejection	5	89	267	25990	5.46859	0.00226721	0.0410098	GZMB,FASLG,GNLY,PRF1,IFNG
WP	Neg	PC3	M39465	Wp hair follicle development cytodifferentiation part 3 of 3	5	89	267	25990	5.46859	0.00226721	0.0410098	RBPJ,IFNG,TCF4,RUNX3,ZBTB16
WP	Neg	PC3	M39432	Wp tgfbeta signaling pathway	6	133	267	25990	4.39132	0.00257018	0.0435533	TGFBR3,THBS1,NEDD9,AXIN1,MAPK1,ZEB2
WP	Neg	PC3	M39838	Wp fgfr3 signalling in chondrocyte proliferation and terminal differentiation	3	27	267	25990	10.8156	0.00261292	0.0435533	ATG5,MAPK1,CNP
WP	Neg	PC3	M39441	Wp corticotropinreleasing hormone signaling pathway	5	92	267	25990	5.29026	0.00262028	0.0435533	PLCG2,PRKCB,MAPK1,PRKCQ,TCF4
WP	Neg	PC3	M39372	Wp glial cell differentiation	2	8	267	25990	24.3352	0.0028263	0.0453644	MBP,CNP
WP	Neg	PC3	M39426	Wp g protein signaling pathways	5	94	267	25990	5.1777	0.00287677	0.0453644	ITPR1,AKAP13,PRKCB,PRKCQ,PPP3CA
WP	Neg	PC3	M39764	Wp ras signaling	7	184	267	25990	3.70318	0.00302125	0.0464516	RASAL2,FASLG,SHOC2,PLCG2,PRKCB,MAPK1,GNG2
WP	Neg	PC3	M39632	Wp tcell receptor and costimulatory signaling	3	29	267	25990	10.0697	0.00321518	0.0482277	PPP3CA,FYN,ITK
WP	Neg	PC3	M39429	Wp tcell antigen receptor tcr pathway during staphylococcus aureus infection	4	62	267	25990	6.28005	0.0038083	0.0557644	PRKCQ,IFNG,FYN,ITK
WP	Neg	PC3	M39448	Wp neural crest differentiation	5	101	267	25990	4.81885	0.00391807	0.0560374	RBPJ,AXIN1,TCF4,CTBP2,MBP
WP	Neg	PC3	M39387	Wp wnt signaling pathway and pluripotency	5	103	267	25990	4.72528	0.00425938	0.0583109	AXIN1,CTBP2,PRKCB,CD44,PRKCQ
WP	Neg	PC3	M39364	Wp development and heterogeneity of the ilc family	3	32	267	25990	9.1257	0.00426665	0.0583109	IFNG,TBX21,ZBTB16
WP	Neg	PC3	M39402	Wp focal adhesion	7	199	267	25990	3.42405	0.00463813	0.0609513	FGR,THBS1,VAV3,PRKCB,MAPK1,RAPGEF1,FYN
WP	Neg	PC3	M39745	Wp resistin as a regulator of inflammation	3	33	267	25990	8.84917	0.00465807	0.0609513	PLCG2,MAPK1,ITPR1
WP	Neg	PC3	M39546	Wp mesodermal commitment pathway	6	154	267	25990	3.7925	0.00527018	0.0675242	ARID5B,AXIN1,TCF4,CTBP2,VAV3,JARID2
WP	Neg	PC3	M39729	Wp vegfavegfr2 signaling pathway	11	433	267	25990	2.47286	0.00543967	0.0682734	FOXO3,SND1,CNP,PPP3CA,MOV10,PRKCB,MAPK1,RAB37,RPS6KA5,RAPGEF1,FYN
WP	Neg	PC3	M39492	Wp dna damage response only atm dependent	5	111	267	25990	4.38472	0.00583825	0.0718105	FASLG,FOXO3,AXIN1,MAPK1,CCNG2
WP	Neg	PC3	M39463	Wp mfap5mediated ovarian cancer cell motility and invasiveness	2	13	267	25990	14.9755	0.00761098	0.0863415	MAPK1,PRKCQ
WP	Neg	PC3	M39614	Wp serotonin and anxietyrelated events	2	13	267	25990	14.9755	0.00761098	0.0863415	PPP3CA,PRKCB
WP	Neg	PC3	M39341	Wp spinal cord injury	5	119	267	25990	4.08995	0.00779014	0.0863415	FOXO3,MAPK1,MBP,IFNG,PPP3CA
WP	Neg	PC3	M39491	Wp leptin signaling pathway	4	76	267	25990	5.1232	0.00783539	0.0863415	JAK1,PLCG2,MAPK1,FYN
WP	Neg	PC3	M39392	Wp il5 signaling pathway	3	40	267	25990	7.30056	0.00800238	0.0863415	JAK1,FOXO3,MAPK1
WP	Neg	PC3	M39695	Wp microglia pathogen phagocytosis pathway	3	40	267	25990	7.30056	0.00800238	0.0863415	VAV3,PLCG2,TYROBP
WP	Neg	PC3	M39905	Wp kisspeptinkisspeptin receptor system in the ovary	3	40	267	25990	7.30056	0.00800238	0.0863415	PRKCB,MAPK1,PRKCQ
WP	Neg	PC3	M39523	Wp bladder cancer	3	41	267	25990	7.1225	0.00856957	0.090867	THBS1,MAPK1,RPS6KA5
WP	Neg	PC3	M39564	Wp erk pathway in huntingtons disease	2	15	267	25990	12.9788	0.0101081	0.105364	MAPK1,RPS6KA5
WP	Neg	PC3	M39716	Wp interleukin11 signaling pathway	3	44	267	25990	6.63687	0.01041	0.106703	JAK1,MAPK1,FYN
WP	Neg	PC3	M39511	Wp serotonin and anxiety	2	17	267	25990	11.4519	0.0129169	0.124124	PPP3CA,PRKCB
WP	Neg	PC3	M39512	Wp ncrnas involved in stat3 signaling in hepatocellular carcinoma	2	17	267	25990	11.4519	0.0129169	0.124124	MIR200B,JAK1
WP	Neg	PC3	M39832	Wp glycosaminoglycan degradation	2	17	267	25990	11.4519	0.0129169	0.124124	HEXA,ARSB
WP	Neg	PC3	M39907	Wp map3k1 role in promoting and blocking gonadal determination	2	17	267	25990	11.4519	0.0129169	0.124124	MAPK1,AXIN1
WP	Neg	PC3	M39719	Wp focal adhesionpi3kaktmtorsignaling pathway	8	305	267	25990	2.5532	0.0139752	0.129411	FOXO3,RAB2A,EFNA5,THBS1,ELAVL1,JAK1,MAPK1,GNG2
WP	Neg	PC3	M39327	Wp mammary gland development pathway embryonic development stage 1 of 4	2	18	267	25990	10.8156	0.014434	0.129411	MIR200B,ZEB2
WP	Neg	PC3	M39525	Wp regulation of wntbcatenin signaling by small molecule compounds	2	18	267	25990	10.8156	0.014434	0.129411	AXIN1,TCF4
WP	Neg	PC3	M39644	Wp il9 signaling pathway	2	18	267	25990	10.8156	0.014434	0.129411	MAPK1,JAK1
WP	Neg	PC3	M39413	Wp hepatitis c and hepatocellular carcinoma	3	50	267	25990	5.84045	0.0147297	0.129411	JAK1,FASLG,CD44
WP	Neg	PC3	M39543	Wp structural pathway of interleukin 1 il1	3	50	267	25990	5.84045	0.0147297	0.129411	MAPK1,MBP,RPS6KA5
WP	Neg	PC3	M39358	Wp serotonin receptor 467 and nr3c signaling	2	19	267	25990	10.2464	0.0160239	0.136871	MAPK1,RPS6KA5
WP	Neg	PC3	M39903	Wp hostpathogen interaction of human corona viruses autophagy	2	19	267	25990	10.2464	0.0160239	0.136871	ATG5,ATG7
WP	Neg	PC3	M39691	Wp brainderived neurotrophic factor bdnf signaling pathway	5	144	267	25990	3.37989	0.0167212	0.140871	FOXO3,RPS6KA5,VAV3,MAPK1,FYN
WP	Neg	PC3	M39479	Wp nanomaterial induced apoptosis	2	20	267	25990	9.73408	0.017685	0.143109	PRF1,FASLG
WP	Neg	PC3	M39485	Wp serotonin receptor 2 and elksrfgata4 signaling	2	20	267	25990	9.73408	0.017685	0.143109	MAPK1,ITPR1
WP	Neg	PC3	M40044	Wp aspirin and mirnas	2	20	267	25990	9.73408	0.017685	0.143109	MVD,ABCC4
WP	Neg	PC3	M39876	Wp pathogenesis of sarscov2 mediated by nsp9nsp10 complex	2	21	267	25990	9.27055	0.0194158	0.155074	CD247,FYN
WP	Neg	PC3	M39577	Wp integrinmediated cell adhesion	4	100	267	25990	3.89363	0.0198114	0.156205	VAV3,MAPK1,RAPGEF1,FYN
WP	Neg	PC3	M39329	Wp calcium regulation in the cardiac cell	5	152	267	25990	3.202	0.0206062	0.160416	RGS6,ITPR1,PRKCB,PRKCQ,GNG2
WP	Neg	PC3	M39593	Wp hematopoietic stem cell gene regulation by gabp alphabeta complex	2	22	267	25990	8.84917	0.0212145	0.163086	GZMB,FOXO3
WP	Neg	PC3	M39801	Wp hepatitis b infection	5	154	267	25990	3.16042	0.021662	0.164471	FASLG,STAT4,JAK1,PRKCB,MAPK1
WP	Neg	PC3	M39325	Wp nanoparticle triggered autophagic cell death	2	24	267	25990	8.11174	0.0250096	0.185172	ATG5,ATG7
WP	Neg	PC3	M39734	Wp ciliary landscape	6	217	267	25990	2.69145	0.0250629	0.185172	CTBP2,RAB2A,EXOSC7,EXOC4,NUP133,MKLN1
WP	Neg	PC3	M39736	Wp pi3kakt signaling pathway	8	341	267	25990	2.28366	0.0252918	0.185172	FASLG,FOXO3,PIK3AP1,EFNA5,THBS1,JAK1,MAPK1,GNG2
WP	Neg	PC3	M39508	Wp tyrobp causal network	3	62	267	25990	4.71004	0.0259934	0.185453	ABCC4,RUNX3,TYROBP
WP	Neg	PC3	M39540	Wp notch signaling pathway netpath	3	62	267	25990	4.71004	0.0259934	0.185453	RBPJ,MAML3,NCOR2
WP	Neg	PC3	M39334	Wp egfegfr signaling pathway	5	162	267	25990	3.00435	0.0262348	0.185453	RPS6KA5,JAK1,VAV3,PRKCB,MAPK1
WP	Neg	PC3	M39623	Wp endometrial cancer	3	63	267	25990	4.63528	0.0270913	0.189331	FOXO3,MAPK1,AXIN1
WP	Neg	PC3	M39562	Wp oncostatin m signaling pathway	3	66	267	25990	4.42458	0.0305317	0.20839	JAK1,PRKCB,MAPK1
WP	Neg	PC3	M39682	Wp pathways affected in adenoid cystic carcinoma	3	66	267	25990	4.42458	0.0305317	0.20839	FOXO3,ARID5B,MAML3
WP	Neg	PC3	M39669	Wp wnt signaling	4	115	267	25990	3.38577	0.0310525	0.20839	AXIN1,CTBP2,PRKCB,PPP3CA
WP	Neg	PC3	M39545	Wp canonical and noncanonical notch signaling	2	27	267	25990	7.21043	0.0311738	0.20839	RBPJ,MAML3
WP	Neg	PC3	M39684	Wp human thyroid stimulating hormone tsh signaling pathway	3	68	267	25990	4.29445	0.0329469	0.217875	JAK1,MAPK1,GNG2
WP	Neg	PC3	M39852	Wp osteoblast differentiation	4	119	267	25990	3.27196	0.0345699	0.225587	RBPJ,PRKCB,MAPK1,PRKCQ
WP	Neg	PC3	M40042	Wp glucocorticoid receptor pathway	3	70	267	25990	4.17175	0.0354587	0.225587	TGFBR3,ABHD2,AKAP13
WP	Neg	PC3	M39616	Wp pdgfrbeta pathway	2	29	267	25990	6.71316	0.0355804	0.225587	JAK1,PRKCB
WP	Neg	PC3	M39797	Wp selective expression of chemokine receptors during tcell polarization	2	29	267	25990	6.71316	0.0355804	0.225587	IFNG,IL18R1
WP	Neg	PC3	M39804	Wp fragile x syndrome	4	122	267	25990	3.1915	0.0373538	0.226109	ITPR1,MAPK1,PPP3CA,FYN
WP	Neg	PC3	M39516	Wp extracellular vesiclemediated signaling in recipient cells	2	30	267	25990	6.48939	0.0378686	0.226109	AXIN1,TGFBR3
WP	Neg	PC3	M39775	Wp oligodendrocyte specification and differentiation leading to myelin components for cns	2	30	267	25990	6.48939	0.0378686	0.226109	MBP,CNP
WP	Neg	PC3	M39792	Wp cell migration and invasion through p75ntr	2	30	267	25990	6.48939	0.0378686	0.226109	ARF1,EFNA5
WP	Neg	PC3	M39800	Wp fbxl10 enhancement of maperk signaling in diffuse large bcell lymphoma	2	30	267	25990	6.48939	0.0378686	0.226109	MAPK1,KDM2B
WP	Neg	PC3	M39904	Wp autophagy	2	30	267	25990	6.48939	0.0378686	0.226109	ATG7,ATG5
WP	Neg	PC3	M39560	Wp il17 signaling pathway	2	32	267	25990	6.0838	0.0426079	0.249561	JAK1,MAPK1
WP	Neg	PC3	M39641	Wp inflammatory response pathway	2	32	267	25990	6.0838	0.0426079	0.249561	IFNG,THBS1
WP	Neg	PC3	M39601	Wp prolactin signaling pathway	3	76	267	25990	3.8424	0.043567	0.250409	JAK1,MAPK1,FYN
WP	Neg	PC3	M39824	Wp regulatory circuits of the stat3 signaling pathway	3	76	267	25990	3.8424	0.043567	0.250409	JAK1,PRKCB,MAPK1
WP	Neg	PC3	M39594	Wp mapk cascade	2	33	267	25990	5.89944	0.0450563	0.254217	MBP,MAPK1
WP	Neg	PC3	M39893	Wp regucalcin in proximal tubule epithelial kidney cells	2	33	267	25990	5.89944	0.0450563	0.254217	MAPK1,PRKCQ
WP	Neg	PC3	M39338	Wp angiopoietin like protein 8 regulatory pathway	4	132	267	25990	2.94972	0.0475389	0.263483	FOXO3,RPS6KA5,MAPK1,RAPGEF1
WP	Neg	PC3	M39383	Wp signaling of hepatocyte growth factor receptor	2	34	267	25990	5.72593	0.0475554	0.263483	RAPGEF1,MAPK1
PID	Pos	PC1	M88	Pid cd8 tcr pathway	9	53	243	26281	18.3655	1.32464e-09	2.59629e-07	FYN,LAT,ZAP70,CD247,LCK,B2M,RASGRP1,PRKCQ,PTPRC
PID	Pos	PC1	M34	Pid tcr pathway	9	64	243	26281	15.2089	7.53621e-09	7.38549e-07	RASGRP1,ZAP70,FYN,LCK,PTPRC,LAT,PRKCQ,ITK,CD247
PID	Pos	PC1	M141	Pid pi3kci pathway	7	48	243	26281	15.7722	2.82516e-07	1.41927e-05	LCK,FYN,LAT,ITK,PIK3R1,ZAP70,PIK3R5
PID	Pos	PC1	M234	Pid il2 stat5 pathway	6	30	243	26281	21.6305	2.89646e-07	1.41927e-05	LCK,CCND3,BCL2,LTA,PIK3R1,FASLG
PID	Pos	PC1	M7	Pid fcer1 pathway	7	59	243	26281	12.8316	1.20064e-06	4.7065e-05	PIK3R1,FYN,MAPK1,ITK,NFATC2,LAT,NFKB1
PID	Pos	PC1	M124	Pid cxcr4 pathway	8	100	243	26281	8.65218	4.26007e-06	0.000139162	LCK,PTPRC,GNA13,PIK3R5,PIK3R1,ITGA9,CD247,FYN
PID	Pos	PC1	M122	Pid il2 1pathway	6	55	243	26281	11.7984	1.16581e-05	0.00031571	MAPK1,LCK,FYN,IKZF3,PIK3R1,BCL2
PID	Pos	PC1	M99	Pid txa2pathway	6	56	243	26281	11.5877	1.29568e-05	0.00031571	PRKCQ,PIK3R5,LCK,PRKCH,FYN,GNA13
PID	Pos	PC1	M143	Pid il2 pi3k pathway	5	34	243	26281	15.9047	1.44969e-05	0.00031571	PIK3R1,NFKB1,LCK,BCL2,E2F1
PID	Pos	PC1	M281	Pid fak pathway	6	59	243	26281	10.9985	1.75696e-05	0.000344363	FYN,ACTN1,PIK3R1,NCK2,ETS1,MAPK1
PID	Pos	PC1	M54	Pid il12 2pathway	6	62	243	26281	10.4663	2.34235e-05	0.000417364	LCK,NFKB1,CD247,B2M,IL12RB2,FASLG
PID	Pos	PC1	M186	Pid pdgfrb pathway	8	129	243	26281	6.70712	2.77335e-05	0.00045298	MAPK1,PIK3R5,FYN,NCK2,LCK,YWHAZ,SLA,PIK3R1
PID	Pos	PC1	M272	Pid cd8 tcr downstream pathway	6	65	243	26281	9.98329	3.07537e-05	0.000463671	CD247,MAPK1,PRKCQ,B2M,FASLG,NFATC2
PID	Pos	PC1	M105	Pid telomerase pathway	6	67	243	26281	9.68528	3.65888e-05	0.000512244	IRF1,MAPK1,ATM,E2F1,NFKB1,SMG6
PID	Pos	PC1	M60	Pid nfat tfpathway	5	45	243	26281	12.0169	5.85944e-05	0.000765634	PRKCQ,NFATC2,FASLG,E2F1,IKZF1
PID	Pos	PC1	M92	Pid angiopoietin receptor pathway	5	49	243	26281	11.0359	8.87439e-05	0.00107141	MAPK1,FYN,PIK3R1,NFKB1,ETS1
PID	Pos	PC1	M48	Pid met pathway	6	79	243	26281	8.2141	9.2928e-05	0.00107141	MAPK1,RANBP9,PIK3R1,NCK2,RPTOR,ETS1
PID	Pos	PC1	M50	Pid ptp1b pathway	5	52	243	26281	10.3993	0.000118257	0.00128769	LAT,PIK3R1,PRLR,FYN,LCK
PID	Pos	PC1	M113	Pid nfat 3pathway	5	53	243	26281	10.203	0.000129599	0.00133692	PRKCQ,BCL2,YWHAZ,NFATC2,PRKCH
PID	Pos	PC1	M257	Pid ephrinb rev pathway	4	30	243	26281	14.4203	0.000161747	0.00158512	LCK,PIK3R1,FYN,NCK2
PID	Pos	PC1	M10	Pid bcr 5pathway	5	63	243	26281	8.58351	0.000294499	0.00265526	PTPRC,NFKB1,PIK3R1,ETS1,MAPK1
PID	Pos	PC1	M197	Pid hiv nef pathway	4	35	243	26281	12.3603	0.000298039	0.00265526	BCL2,FASLG,CD247,NFKB1
PID	Pos	PC1	M13	Pid erbb4 pathway	4	38	243	26281	11.3844	0.00041114	0.00350363	FYN,PIK3R1,MAPK1,PRLR
PID	Pos	PC1	M26	Pid nfkappab atypical pathway	3	17	243	26281	19.0857	0.00048239	0.00393952	NFKB1,PIK3R1,LCK
PID	Pos	PC1	M16	Pid insulin pathway	4	44	243	26281	9.83202	0.000724029	0.00567639	EXOC1,NCK2,EXOC2,PIK3R1
PID	Pos	PC1	M226	Pid vegfr1 pathway	3	26	243	26281	12.4791	0.00173464	0.0130765	PIK3R1,MAPK1,HIF1A
PID	Pos	PC1	M69	Pid reelin pathway	3	28	243	26281	11.5877	0.00215611	0.0156518	NCK2,PIK3R1,FYN
PID	Pos	PC1	M125	Pid igf1 pathway	3	29	243	26281	11.1882	0.0023886	0.0166436	NCK2,PIK3R1,YWHAZ
PID	Pos	PC1	M28	Pid il4 2pathway	4	61	243	26281	7.09195	0.00246257	0.0166436	PIK3R1,LTA,OPRM1,ETS1
PID	Pos	PC1	M63	Pid avb3 opn pathway	3	31	243	26281	10.4663	0.0028987	0.0183273	PIK3R1,NFKB1,MAPK1
PID	Pos	PC1	M193	Pid nephrin neph1 pathway	3	31	243	26281	10.4663	0.0028987	0.0183273	PIK3R1,FYN,NCK2
PID	Pos	PC1	M108	Pid netrin pathway	3	32	243	26281	10.1393	0.00317693	0.018869	FYN,PIK3R1,MAPK1
PID	Pos	PC1	M275	Pid alpha synuclein pathway	3	32	243	26281	10.1393	0.00317693	0.018869	LCK,MAPK1,FYN
PID	Pos	PC1	M233	Pid epo pathway	3	33	243	26281	9.83202	0.00347099	0.0200092	PIK3R1,BCL2,NFKB1
PID	Pos	PC1	M177	Pid epha fwdpathway	3	34	243	26281	9.54285	0.00378116	0.0209716	PIK3R5,FYN,LCK
PID	Pos	PC1	M237	Pid vegfr1 2 pathway	4	69	243	26281	6.2697	0.00385193	0.0209716	MAPK1,FYN,PIK3R1,NCK2
PID	Pos	PC1	M22	Pid gmcsf pathway	3	35	243	26281	9.27019	0.0041077	0.0211871	YWHAZ,PIK3R1,MAPK1
PID	Pos	PC1	M127	Pid erbb1 receptor proximal pathway	3	35	243	26281	9.27019	0.0041077	0.0211871	NCK2,PIK3R1,MAPK1
PID	Pos	PC1	M196	Pid il23 pathway	3	37	243	26281	8.7691	0.0048109	0.0241779	PIK3R1,IL19,NFKB1
PID	Pos	PC1	M161	Pid ifng pathway	3	40	243	26281	8.11142	0.00599441	0.0293726	MAPK1,IRF1,PIK3R1
PID	Pos	PC1	M159	Pid amb2 neutrophils pathway	3	41	243	26281	7.91358	0.00642407	0.029979	LCK,FYN,NFKB1
PID	Pos	PC1	M214	Pid erbb1 internalization pathway	3	41	243	26281	7.91358	0.00642407	0.029979	AMPH,PIK3R1,UBE2D2
PID	Pos	PC1	M64	Pid s1p s1p4 pathway	2	14	243	26281	15.4503	0.00720056	0.0328212	GNA13,MAPK1
PID	Pos	PC1	M144	Pid ceramide pathway	3	44	243	26281	7.37402	0.00782119	0.0348398	MAPK1,NFKB1,BCL2
PID	Pos	PC1	M87	Pid lkb1 pathway	3	47	243	26281	6.90334	0.0093839	0.0408721	MARK2,RPTOR,YWHAZ
PID	Pos	PC1	M67	Pid arf6 trafficking pathway	3	49	243	26281	6.62157	0.0105196	0.0448226	EXOC2,ITGA9,EXOC1
PID	Pos	PC1	M220	Pid caspase pathway	3	51	243	26281	6.3619	0.0117315	0.048923	DIABLO,BCL2,SATB1
PID	Pos	PC1	M184	Pid ecadherin keratinocyte pathway	2	21	243	26281	10.3002	0.0159261	0.0637046	PIK3R1,FYN
PID	Pos	PC1	M199	Pid p38 mk2 pathway	2	21	243	26281	10.3002	0.0159261	0.0637046	YWHAZ,CDC25B
PID	Pos	PC1	M164	Pid erbb1 downstream pathway	4	105	243	26281	4.12009	0.016481	0.0646055	YWHAZ,MAPK1,PIK3R1,MAP2K5
PID	Pos	PC1	M37	Pid nfkappab canonical pathway	2	23	243	26281	9.40454	0.0189567	0.0714595	NFKB1,ATM
PID	Pos	PC1	M58	Pid ar pathway	3	61	243	26281	5.31896	0.0189586	0.0714595	SVIL,RANBP9,CCND3
PID	Pos	PC1	M268	Pid s1p s1p2 pathway	2	24	243	26281	9.01269	0.0205556	0.0749181	GNA13,MAPK1
PID	Pos	PC1	M8	Pid endothelin pathway	3	63	243	26281	5.15011	0.0206407	0.0749181	PRKCQ,PRKCH,MAPK1
PID	Pos	PC1	M182	Pid il3 pathway	2	25	243	26281	8.65218	0.0222087	0.077032	YWHAZ,PIK3R1
PID	Pos	PC1	M274	Pid lymph angiogenesis pathway	2	25	243	26281	8.65218	0.0222087	0.077032	MAPK1,PIK3R1
PID	Pos	PC1	M15	Pid lysophospholipid pathway	3	65	243	26281	4.99164	0.0224022	0.077032	NFKB1,PIK3R1,GNA13
PID	Pos	PC1	M153	Pid p75 ntr pathway	3	68	243	26281	4.77142	0.0251933	0.085136	E2F1,PIK3R1,DIABLO
PID	Pos	PC1	M33	Pid glypican 1pathway	2	27	243	26281	8.01128	0.025673	0.0852866	LCK,FYN
PID	Pos	PC1	M121	Pid mtor 4pathway	3	69	243	26281	4.70227	0.0261634	0.085467	MAPK1,YWHAZ,RPTOR
PID	Pos	PC1	M167	Pid ap1 pathway	3	70	243	26281	4.6351	0.0271532	0.0854996	ETS1,HIF1A,NFATC2
PID	Pos	PC1	M79	Pid trail pathway	2	28	243	26281	7.72516	0.027482	0.0854996	MAPK1,PIK3R1
PID	Pos	PC1	M235	Pid tcr calcium pathway	2	28	243	26281	7.72516	0.027482	0.0854996	NFATC2,FASLG
PID	Pos	PC1	M55	Pid s1p s1p3 pathway	2	29	243	26281	7.45878	0.0293408	0.0898561	MAPK1,GNA13
PID	Pos	PC1	M40	Pid e2f pathway	3	73	243	26281	4.44461	0.0302414	0.0911896	E2F1,ATM,CCND3
PID	Pos	PC1	M76	Pid p38 alpha beta pathway	2	30	243	26281	7.21015	0.0312483	0.0927979	LCK,FYN
PID	Pos	PC1	M213	Pid ar nongenomic pathway	2	31	243	26281	6.97757	0.0332034	0.0971324	MAPK1,PIK3R1
PID	Pos	PC1	M290	Pid il12 stat4 pathway	2	32	243	26281	6.75952	0.0352052	0.101474	IRF1,CD247
PID	Pos	PC1	M223	Pid beta catenin nuc pathway	3	79	243	26281	4.10705	0.0369476	0.104307	YWHAZ,TNIK,TCF7
PID	Pos	PC1	M277	Pid integrin a4b1 pathway	2	33	243	26281	6.55468	0.0372525	0.104307	ADAM28,YWHAZ
PID	Pos	PC1	M2	Pid smad2 3nuclear pathway	3	81	243	26281	4.00564	0.0393383	0.105637	MED15,RUNX1,RUNX3
PID	Pos	PC1	M110	Pid il1 pathway	2	34	243	26281	6.3619	0.0393445	0.105637	NFKB1,PIK3R1
PID	Pos	PC1	M270	Pid mapk trk pathway	2	34	243	26281	6.3619	0.0393445	0.105637	MAPK1,MAP2K5
PID	Pos	PC1	M115	Pid reg gr pathway	3	82	243	26281	3.95679	0.0405625	0.107436	IRF1,NFKB1,MAPK1
PID	Pos	PC1	M195	Pid cmyb pathway	3	84	243	26281	3.86258	0.0430681	0.112551	ETS1,BCL2,ZFPM1
PID	Pos	PC1	M271	Pid pi3k plc trk pathway	2	36	243	26281	6.00846	0.0436583	0.112592	PIK3R1,YWHAZ
PID	Pos	PC1	M94	Pid fas pathway	2	38	243	26281	5.69222	0.0481387	0.122535	FASLG,PIK3R1
PID	Pos	PC2	M34	Pid tcr pathway	9	64	287	26238	12.8562	3.21787e-08	6.30703e-06	FYN,PAG1,LCK,RASSF5,PTPRC,PRKCQ,FYB1,ITK,CD247
PID	Pos	PC2	M124	Pid cxcr4 pathway	9	100	287	26238	8.22794	1.57671e-06	0.000114047	LCK,PTPRC,PAG1,STAT5B,GRK6,PTK2B,CD247,PXN,FYN
PID	Pos	PC2	M88	Pid cd8 tcr pathway	7	53	287	26238	12.0746	1.74561e-06	0.000114047	FYN,PAG1,CD247,LCK,RASSF5,PRKCQ,PTPRC
PID	Pos	PC2	M186	Pid pdgfrb pathway	9	129	287	26238	6.37825	1.28906e-05	0.000631639	STAT5B,PAG1,FYN,NCK2,ACTN4,LCK,DNM2,ARHGAP35,ACTR3
PID	Pos	PC2	M122	Pid il2 1pathway	6	55	287	26238	9.97327	3.00498e-05	0.00117795	LCK,FYN,STAT5B,BCL2,PTK2B,STAM
PID	Pos	PC2	M234	Pid il2 stat5 pathway	4	30	287	26238	12.1895	0.000307016	0.00859645	LCK,STAT5B,BCL2,FASLG
PID	Pos	PC2	M257	Pid ephrinb rev pathway	4	30	287	26238	12.1895	0.000307016	0.00859645	LCK,TIAM1,FYN,NCK2
PID	Pos	PC2	M281	Pid fak pathway	5	59	287	26238	7.74759	0.000467217	0.0114468	FYN,ARHGAP35,NCK2,ETS1,PXN
PID	Pos	PC2	M197	Pid hiv nef pathway	4	35	287	26238	10.4482	0.00056194	0.0122378	BCL2,TNFRSF1A,FASLG,CD247
PID	Pos	PC2	M241	Pid rac1 reg pathway	4	38	287	26238	9.62333	0.000772088	0.0139658	TIAM1,TRIO,ARHGAP9,SPATA13
PID	Pos	PC2	M255	Pid hif1 tfpathway	5	66	287	26238	6.92588	0.000783796	0.0139658	ETS1,HK2,RORA,ITGB2,PKM
PID	Pos	PC2	M237	Pid vegfr1 2 pathway	5	69	287	26238	6.62475	0.000959789	0.0155654	FYN,DNM2,NCK2,PTK2B,PXN
PID	Pos	PC2	M159	Pid amb2 neutrophils pathway	4	41	287	26238	8.91918	0.0010324	0.0155654	ITGB2,LCK,FYN,SELPLG
PID	Pos	PC2	M68	Pid rhoa reg pathway	4	46	287	26238	7.9497	0.00159397	0.0223155	ARHGAP9,TRIO,ARHGEF3,ARHGAP35
PID	Pos	PC2	M48	Pid met pathway	5	79	287	26238	5.78618	0.00176176	0.0228884	NCK2,RPTOR,ETS1,PXN,SH3KBP1
PID	Pos	PC2	M142	Pid ajdiss 2pathway	4	48	287	26238	7.61847	0.00186844	0.0228884	TIAM1,RAB7A,DNM2,FYN
PID	Pos	PC2	M92	Pid angiopoietin receptor pathway	4	49	287	26238	7.46299	0.00201724	0.0232576	PXN,FYN,STAT5B,ETS1
PID	Pos	PC2	M220	Pid caspase pathway	4	51	287	26238	7.17032	0.00233901	0.0254693	CASP1,BCL2,LMNB1,TNFRSF1A
PID	Pos	PC2	M33	Pid glypican 1pathway	3	27	287	26238	10.158	0.00311903	0.0321753	TGFBR2,LCK,FYN
PID	Pos	PC2	M99	Pid txa2pathway	4	56	287	26238	6.53011	0.00329441	0.0322852	PRKCQ,LCK,PRKCH,FYN
PID	Pos	PC2	M54	Pid il12 2pathway	4	62	287	26238	5.89817	0.00475478	0.0432959	RAB7A,LCK,CD247,FASLG
PID	Pos	PC2	M8	Pid endothelin pathway	4	63	287	26238	5.80455	0.00503422	0.0432959	PTK2B,PRKCQ,PRKCH,ADCY3
PID	Pos	PC2	M275	Pid alpha synuclein pathway	3	32	287	26238	8.57078	0.00508064	0.0432959	PTK2B,LCK,FYN
PID	Pos	PC2	M277	Pid integrin a4b1 pathway	3	33	287	26238	8.31105	0.00554402	0.0441053	PXN,PTK2B,PTPRA
PID	Pos	PC2	M15	Pid lysophospholipid pathway	4	65	287	26238	5.62594	0.00562568	0.0441053	TIAM1,PTK2B,PXN,ADCY3
PID	Pos	PC2	M160	Pid avb3 integrin pathway	4	74	287	26238	4.94171	0.00885935	0.0667859	PXN,TGFBR2,PTK2B,COL15A1
PID	Pos	PC2	M71	Pid ilk pathway	3	45	287	26238	6.09477	0.0130996	0.0916969	NCK2,PXN,DIAPH1
PID	Pos	PC2	M60	Pid nfat tfpathway	3	45	287	26238	6.09477	0.0130996	0.0916969	PRKCQ,FASLG,DGKA
PID	Pos	PC2	M195	Pid cmyb pathway	4	84	287	26238	4.35341	0.0136546	0.0922866	ETS1,BCL2,SKI,HIPK2
PID	Pos	PC2	M141	Pid pi3kci pathway	3	48	287	26238	5.71385	0.01559	0.101855	LCK,FYN,ITK
PID	Pos	PC2	M273	Pid epha2 fwd pathway	2	19	287	26238	9.62333	0.0180352	0.114029	TIAM1,ARHGAP35
PID	Pos	PC2	M50	Pid ptp1b pathway	3	52	287	26238	5.27432	0.0192969	0.118193	STAT5B,FYN,LCK
PID	Pos	PC2	M113	Pid nfat 3pathway	3	53	287	26238	5.17481	0.020293	0.120528	PRKCQ,BCL2,PRKCH
PID	Pos	PC2	M100	Pid shp2 pathway	3	57	287	26238	4.81166	0.0245561	0.141559	ARHGAP35,PAG1,LCK
PID	Pos	PC2	M37	Pid nfkappab canonical pathway	2	23	287	26238	7.9497	0.0259316	0.142257	UBE2D3,TNFRSF1A
PID	Pos	PC2	M7	Pid fcer1 pathway	3	59	287	26238	4.64856	0.0268546	0.142257	FYN,ITK,PXN
PID	Pos	PC2	M261	Pid p53 regulation pathway	3	59	287	26238	4.64856	0.0268546	0.142257	HIPK2,MDM4,CSNK1G3
PID	Pos	PC2	M10	Pid bcr 5pathway	3	63	287	26238	4.35341	0.0317841	0.159774	PTPRC,PAG1,ETS1
PID	Pos	PC2	M162	Pid rxr vdr pathway	2	26	287	26238	7.03243	0.0326069	0.159774	FAM120B,BCL2
PID	Pos	PC2	M32	Pid hdac classiii pathway	2	26	287	26238	7.03243	0.0326069	0.159774	HDAC4,ACSS2
PID	Pos	PC2	M272	Pid cd8 tcr downstream pathway	3	65	287	26238	4.21946	0.0344141	0.164516	CD247,PRKCQ,FASLG
PID	Pos	PC2	M101	Pid hdac classi pathway	3	66	287	26238	4.15553	0.0357701	0.166927	CHD3,TNFRSF1A,HDAC4
PID	Pos	PC2	M69	Pid reelin pathway	2	28	287	26238	6.53011	0.0373891	0.170425	NCK2,FYN
PID	Pos	PC2	M125	Pid igf1 pathway	2	29	287	26238	6.30494	0.0398746	0.177623	NCK2,PXN
PID	Pos	PC2	M76	Pid p38 alpha beta pathway	2	30	287	26238	6.09477	0.042421	0.18075	LCK,FYN
PID	Pos	PC2	M83	Pid cdc42 reg pathway	2	30	287	26238	6.09477	0.042421	0.18075	DOCK10,SPATA13
PID	Pos	PC2	M193	Pid nephrin neph1 pathway	2	31	287	26238	5.89817	0.0450264	0.18777	FYN,NCK2
PID	Pos	PC2	M108	Pid netrin pathway	2	32	287	26238	5.71385	0.0476895	0.194732	TRIO,FYN
PID	Pos	PC3	M34	Pid tcr pathway	13	64	235	26279	22.7146	1.47055e-14	2.88229e-12	RASGRP1,CD3D,PTPN6,CBL,CD3E,PAG1,PLCG1,GRAP2,CD3G,LAT,CD28,FYB1,MALT1
PID	Pos	PC3	M88	Pid cd8 tcr pathway	12	53	235	26279	25.319	3.80794e-14	3.73178e-12	LAT,CBL,PAG1,MALT1,CD3G,PLCG1,PTPN6,CD3E,CD28,RASGRP1,GRAP2,CD3D
PID	Pos	PC3	M10	Pid bcr 5pathway	6	63	235	26279	10.6501	2.12938e-05	0.0013912	PAG1,PTPN6,NFKB1,NFATC1,ETS1,MALT1
PID	Pos	PC3	M290	Pid il12 stat4 pathway	4	32	235	26279	13.9782	0.000184117	0.00708364	CD3D,CD3G,CD28,CD3E
PID	Pos	PC3	M233	Pid epo pathway	4	33	235	26279	13.5546	0.00020805	0.00708364	PLCG1,CBL,PTPN6,NFKB1
PID	Pos	PC3	M28	Pid il4 2pathway	5	61	235	26279	9.16603	0.000216846	0.00708364	CBL,OPRM1,PTPN6,ETS1,IL4R
PID	Pos	PC3	M7	Pid fcer1 pathway	4	59	235	26279	7.58139	0.00193008	0.0504565	CBL,LAT,NFKB1,PLCG1
PID	Pos	PC3	M124	Pid cxcr4 pathway	5	100	235	26279	5.59128	0.00207105	0.0504565	PTPN6,PAG1,CD3E,CD3D,CD3G
PID	Pos	PC3	M54	Pid il12 2pathway	4	62	235	26279	7.21455	0.00231688	0.0504565	CD3G,NFKB1,CD3D,CD3E
PID	Pos	PC3	M272	Pid cd8 tcr downstream pathway	4	65	235	26279	6.88157	0.00275398	0.0539779	CD3E,CD3D,NFATC1,CD3G
PID	Pos	PC3	M196	Pid il23 pathway	3	37	235	26279	9.06694	0.00438392	0.0781135	NFKB1,IL23A,CD3E
PID	Pos	PC3	M48	Pid met pathway	4	79	235	26279	5.66205	0.00554703	0.0836322	CBL,PLCG1,RPTOR,ETS1
PID	Pos	PC3	M223	Pid beta catenin nuc pathway	4	79	235	26279	5.66205	0.00554703	0.0836322	AXIN2,TCF7,LEF1,CAMK4
PID	Pos	PC3	M115	Pid reg gr pathway	4	82	235	26279	5.4549	0.00632489	0.0882089	FKBP5,NFATC1,NFKB1,NR3C1
PID	Pos	PC3	M190	Pid tcr jnk pathway	2	14	235	26279	15.9751	0.00675068	0.0882089	LAT,GRAP2
PID	Pos	PC3	M60	Pid nfat tfpathway	3	45	235	26279	7.45504	0.00759821	0.0930781	CTLA4,NFATC1,DGKA
PID	Pos	PC3	M231	Pid kit pathway	3	52	235	26279	6.45147	0.0113062	0.129211	GRAP2,CBL,PTPN6
PID	Pos	PC3	M273	Pid epha2 fwd pathway	2	19	235	26279	11.7711	0.0123185	0.129211	TIAM1,CBL
PID	Pos	PC3	M286	Pid tgfbr pathway	3	54	235	26279	6.21253	0.0125256	0.129211	SMURF1,SMAD3,TGFBR2
PID	Pos	PC3	M100	Pid shp2 pathway	3	57	235	26279	5.88555	0.0144907	0.142009	IL6R,PAG1,IL6ST
PID	Pos	PC3	M281	Pid fak pathway	3	59	235	26279	5.68604	0.0158922	0.148327	ACTN1,ETS1,PLCG1
PID	Pos	PC3	M37	Pid nfkappab canonical pathway	2	23	235	26279	9.72396	0.0178042	0.158619	MALT1,NFKB1
PID	Pos	PC3	M200	Pid era genomic pathway	3	64	235	26279	5.24182	0.0197187	0.161165	APBB1,SET,AXIN2
PID	Pos	PC3	M15	Pid lysophospholipid pathway	3	65	235	26279	5.16118	0.0205396	0.161165	NFKB1,PLCG1,TIAM1
PID	Pos	PC3	M101	Pid hdac classi pathway	3	66	235	26279	5.08298	0.021379	0.161165	CHD3,SMURF1,NFKB1
PID	Pos	PC3	M255	Pid hif1 tfpathway	3	66	235	26279	5.08298	0.021379	0.161165	ETS1,SMAD3,FECH
PID	Pos	PC3	M226	Pid vegfr1 pathway	2	26	235	26279	8.60196	0.0224741	0.163146	CBL,PLCG1
PID	Pos	PC3	M237	Pid vegfr1 2 pathway	3	69	235	26279	4.86198	0.0240088	0.168062	PTPN6,CBL,PLCG1
PID	Pos	PC3	M167	Pid ap1 pathway	3	70	235	26279	4.79252	0.0249225	0.168442	NR3C1,ETS1,NFATC1
PID	Pos	PC3	M83	Pid cdc42 reg pathway	2	30	235	26279	7.45504	0.0293887	0.192006	DOCK9,PLCG1
PID	Pos	PC3	M108	Pid netrin pathway	2	32	235	26279	6.9891	0.0331231	0.207379	TRIO,PLCG1
PID	Pos	PC3	M266	Pid ncadherin pathway	2	33	235	26279	6.7773	0.0350562	0.207379	PLCG1,DAGLB
PID	Pos	PC3	M2	Pid smad2 3nuclear pathway	3	81	235	26279	4.14169	0.0361915	0.207379	SKI,NR3C1,SMAD3
PID	Pos	PC3	M30	Pid hdac classii pathway	2	34	235	26279	6.57797	0.037032	0.207379	NR3C1,CAMK4
PID	Pos	PC3	M177	Pid epha fwdpathway	2	34	235	26279	6.57797	0.037032	0.207379	PLCG1,CBL
PID	Pos	PC3	M127	Pid erbb1 receptor proximal pathway	2	35	235	26279	6.39003	0.0390496	0.210028	PTPN6,PLCG1
PID	Pos	PC3	M195	Pid cmyb pathway	3	84	235	26279	3.99377	0.0396481	0.210028	ETS1,SKI,LEF1
PID	Pos	PC3	M271	Pid pi3k plc trk pathway	2	36	235	26279	6.21253	0.0411081	0.212031	PLCG1,CAMK4
PID	Pos	PC3	M241	Pid rac1 reg pathway	2	38	235	26279	5.88555	0.0453443	0.227884	TIAM1,TRIO
PID	Pos	PC3	M46	Pid atr pathway	2	39	235	26279	5.73464	0.0475202	0.232849	RPA1,TIMELESS
PID	Neg	PC1	M12	Pid rhoa pathway	4	45	278	26228	8.38625	0.00130768	0.197419	MAP2K6,PLD1,PRKCZ,LIMK2
PID	Neg	PC1	M195	Pid cmyb pathway	5	84	278	26228	5.61579	0.00201448	0.197419	MPO,SPI1,ETS2,ELANE,HIPK2
PID	Neg	PC1	M23	Pid wnt noncanonical pathway	3	32	278	26228	8.84487	0.00465517	0.203361	PRKCZ,DAAM1,CHD7
PID	Neg	PC1	M279	Pid rb 1pathway	4	64	278	26228	5.89658	0.00476726	0.203361	SPI1,TFDP1,ATF7,E2F3
PID	Neg	PC1	M81	Pid cdc42 pathway	4	69	278	26228	5.46929	0.00622534	0.203361	PLD1,PRKCZ,MAP2K6,LIMK2
PID	Neg	PC1	M237	Pid vegfr1 2 pathway	4	69	278	26228	5.46929	0.00622534	0.203361	MAP2K6,DNM2,CAMKK2,SHB
PID	Neg	PC1	M214	Pid erbb1 internalization pathway	3	41	278	26228	6.90332	0.00932986	0.261236	LRIG1,ITSN1,PIK3R3
PID	Neg	PC1	M56	Pid lpa4 pathway	2	15	278	26228	12.5794	0.0107314	0.262919	ADCY2,ADCY9
PID	Neg	PC1	M151	Pid ar tf pathway	3	53	278	26228	5.3403	0.0186896	0.407019	RXRA,POU2F1,MAP2K6
PID	Neg	PC1	M204	Pid rhodopsin pathway	2	23	278	26228	8.20394	0.0244611	0.45737	PDE6A,GUCY2D
PID	Neg	PC1	M164	Pid erbb1 downstream pathway	4	105	278	26228	3.59411	0.0256687	0.45737	PLD1,PIK3R3,KSR1,PRKCZ
PID	Neg	PC1	M8	Pid endothelin pathway	3	63	278	26228	4.49263	0.0293432	0.479273	ADCY9,CYSLTR2,ADCY2
PID	Neg	PC1	M235	Pid tcr calcium pathway	2	28	278	26228	6.73895	0.0353073	0.532326	POU2F1,RCAN1
PID	Neg	PC1	M193	Pid nephrin neph1 pathway	2	31	278	26228	6.0868	0.0425471	0.595659	PIK3R3,PRKCZ
PID	Neg	PC1	M186	Pid pdgfrb pathway	4	129	278	26228	2.92544	0.0487284	0.600891	ACTN4,DNM2,KSR1,PIK3R3
PID	Neg	PC2	M10	Pid bcr 5pathway	8	63	273	26239	12.2049	2.92603e-07	5.73501e-05	BLNK,CD19,VAV2,PPP3CC,CARD11,NFATC1,SYK,POU2F2
PID	Neg	PC2	M241	Pid rac1 reg pathway	4	38	273	26239	10.1172	0.000640534	0.0627724	VAV2,ARHGEF7,ARHGEF2,ELMO1
PID	Neg	PC2	M81	Pid cdc42 pathway	4	69	273	26239	5.5718	0.00583541	0.381247	PRKCE,VAV2,LIMK1,ARHGEF7
PID	Neg	PC2	M186	Pid pdgfrb pathway	5	129	273	26239	3.72533	0.0113799	0.505864	VAV2,PRKCE,PTPRJ,BLK,KSR1
PID	Neg	PC2	M141	Pid pi3kci pathway	3	48	273	26239	6.0071	0.0136491	0.505864	BLNK,BLK,SYK
PID	Neg	PC2	M88	Pid cd8 tcr pathway	3	53	273	26239	5.44039	0.0178007	0.505864	CARD11,PRKCE,STIM1
PID	Neg	PC2	M99	Pid txa2pathway	3	56	273	26239	5.14894	0.0205922	0.505864	PRKCE,BLK,SYK
PID	Neg	PC2	M124	Pid cxcr4 pathway	4	100	273	26239	3.84454	0.0206475	0.505864	LIMK1,SSH1,BLK,MAPKAP1
PID	Neg	PC2	M34	Pid tcr pathway	3	64	273	26239	4.50532	0.0291432	0.634673	CARD11,PRKCE,STIM1
PID	Neg	PC2	M83	Pid cdc42 reg pathway	2	30	273	26239	6.40757	0.0387512	0.733453	ARHGEF7,VAV2
PID	Neg	PC2	M275	Pid alpha synuclein pathway	2	32	273	26239	6.0071	0.0435936	0.733453	BLK,SYK
PID	Neg	PC2	M266	Pid ncadherin pathway	2	33	273	26239	5.82506	0.0460947	0.733453	LRP5,CNR1
PID	Neg	PC2	M177	Pid epha fwdpathway	2	34	273	26239	5.65374	0.0486474	0.733453	BLK,VAV2
PID	Neg	PC3	M290	Pid il12 stat4 pathway	8	32	267	26246	24.5749	8.79509e-10	1.07606e-07	IL18RAP,STAT4,IL18R1,PRF1,TBX21,IFNG,PPP3CA,CD247
PID	Neg	PC3	M272	Pid cd8 tcr downstream pathway	10	65	267	26246	15.123	1.09802e-09	1.07606e-07	CD247,MAPK1,PRKCQ,PRF1,FASLG,PRKCB,STAT4,IFNG,PPP3CA,GZMB
PID	Neg	PC3	M54	Pid il12 2pathway	9	62	267	26246	14.2693	1.29224e-08	8.44266e-07	GZMB,IL18RAP,CD247,TBX21,STAT4,PPP3CA,FASLG,IL18R1,IFNG
PID	Neg	PC3	M141	Pid pi3kci pathway	7	48	267	26246	14.3354	5.37495e-07	2.63373e-05	ARF1,PLCG2,FYN,ITK,FGR,FOXO3,ADAP1
PID	Neg	PC3	M196	Pid il23 pathway	5	37	267	26246	13.2837	3.5051e-05	0.001374	IL18RAP,STAT4,IL23R,IFNG,IL18R1
PID	Neg	PC3	M34	Pid tcr pathway	6	64	267	26246	9.21559	4.7923e-05	0.00156549	SH3BP2,FYN,PRKCB,PRKCQ,ITK,CD247
PID	Neg	PC3	M36	Pid il27 pathway	4	26	267	26246	15.123	0.000131241	0.00367473	STAT4,TBX21,JAK1,IFNG
PID	Neg	PC3	M88	Pid cd8 tcr pathway	5	53	267	26246	9.27355	0.000202111	0.00495172	FYN,CD247,PRKCB,PRF1,PRKCQ
PID	Neg	PC3	M122	Pid il2 1pathway	5	55	267	26246	8.93633	0.000240991	0.00514381	IFNG,MAPK1,JAK1,FYN,PRKCB
PID	Neg	PC3	M99	Pid txa2pathway	5	56	267	26246	8.77675	0.00026244	0.00514381	FGR,PRKCQ,GNG2,FYN,PRKCB
PID	Neg	PC3	M177	Pid epha fwdpathway	4	34	267	26246	11.5647	0.000381923	0.00680517	EFNA5,VAV3,FGR,FYN
PID	Neg	PC3	M161	Pid ifng pathway	4	40	267	26246	9.82996	0.000717497	0.0117191	IFNG,JAK1,MAPK1,RAPGEF1
PID	Neg	PC3	M60	Pid nfat tfpathway	4	45	267	26246	8.73774	0.00112415	0.0169487	PRKCQ,IFNG,TBX21,FASLG
PID	Neg	PC3	M206	Pid pdgfra pathway	3	22	267	26246	13.4045	0.00138931	0.0194503	RAPGEF1,JAK1,IFNG
PID	Neg	PC3	M235	Pid tcr calcium pathway	3	28	267	26246	10.5321	0.00282549	0.0334634	FASLG,PPP3CA,IFNG
PID	Neg	PC3	M252	Pid il8 cxcr1 pathway	3	28	267	26246	10.5321	0.00282549	0.0334634	PRKCB,FGR,GNG2
PID	Neg	PC3	M7	Pid fcer1 pathway	4	59	267	26246	6.66438	0.00307317	0.0334634	PRKCB,FYN,MAPK1,ITK
PID	Neg	PC3	M281	Pid fak pathway	4	59	267	26246	6.66438	0.00307317	0.0334634	FYN,RAPGEF1,ARHGAP26,MAPK1
PID	Neg	PC3	M234	Pid il2 stat5 pathway	3	30	267	26246	9.82996	0.00344969	0.0353814	PRF1,JAK1,FASLG
PID	Neg	PC3	M63	Pid avb3 opn pathway	3	31	267	26246	9.51287	0.00379086	0.0353814	VAV3,CD44,MAPK1
PID	Neg	PC3	M213	Pid ar nongenomic pathway	3	31	267	26246	9.51287	0.00379086	0.0353814	MAPK1,GNG2,PLCG2
PID	Neg	PC3	M275	Pid alpha synuclein pathway	3	32	267	26246	9.21559	0.00415189	0.0369896	MAPK1,FGR,FYN
PID	Neg	PC3	M143	Pid il2 pi3k pathway	3	34	267	26246	8.6735	0.00493484	0.0403012	SGMS1,FOXO3,JAK1
PID	Neg	PC3	M210	Pid il8 cxcr2 pathway	3	34	267	26246	8.6735	0.00493484	0.0403012	FGR,PRKCB,GNG2
PID	Neg	PC3	M237	Pid vegfr1 2 pathway	4	69	267	26246	5.69853	0.00539432	0.0422915	MAPK1,FYN,PRKCB,ARF1
PID	Neg	PC3	M134	Pid tcr ras pathway	2	14	267	26246	14.0428	0.00865532	0.0652478	MAPK1,PRKCB
PID	Neg	PC3	M238	Pid thrombin par1 pathway	3	43	267	26246	6.85811	0.00951791	0.0679543	GNG2,PRKCB,AKAP13
PID	Neg	PC3	M120	Pid arf6 downstream pathway	2	15	267	26246	13.1066	0.00992035	0.0679543	ARF1,MAPK1
PID	Neg	PC3	M16	Pid insulin pathway	3	44	267	26246	6.70225	0.0101388	0.0679543	RAPGEF1,FOXO3,EXOC4
PID	Neg	PC3	M186	Pid pdgfrb pathway	5	129	267	26246	3.81006	0.0104012	0.0679543	MAPK1,RAPGEF1,FYN,ARAP1,FGR
PID	Neg	PC3	M68	Pid rhoa reg pathway	3	46	267	26246	6.41085	0.0114498	0.0701299	AKAP13,ARAP1,VAV3
PID	Neg	PC3	M70	Pid ps1 pathway	3	46	267	26246	6.41085	0.0114498	0.0701299	AXIN1,RBPJ,MAPK1
PID	Neg	PC3	M1	Pid fanconi pathway	3	47	267	26246	6.27444	0.0121401	0.072105	BRIP1,USP1,RFC2
PID	Neg	PC3	M113	Pid nfat 3pathway	3	53	267	26246	5.56413	0.0167775	0.0967176	PRKCQ,PRKCB,PPP3CA
PID	Neg	PC3	M124	Pid cxcr4 pathway	4	100	267	26246	3.93199	0.019191	0.10747	FGR,GNG2,CD247,FYN
PID	Neg	PC3	M58	Pid ar pathway	3	61	267	26246	4.83441	0.0243	0.128724	VAV3,SNURF,TCF4
PID	Neg	PC3	M187	Pid trkr pathway	3	61	267	26246	4.83441	0.0243	0.128724	MAPK1,RAPGEF1,MATK
PID	Neg	PC3	M8	Pid endothelin pathway	3	63	267	26246	4.68093	0.0264212	0.132783	PRKCQ,MAPK1,PRKCB
PID	Neg	PC3	M10	Pid bcr 5pathway	3	63	267	26246	4.68093	0.0264212	0.132783	PPP3CA,MAPK1,PLCG2
PID	Neg	PC3	M226	Pid vegfr1 pathway	2	26	267	26246	7.56151	0.0285389	0.13984	PRKCB,MAPK1
PID	Neg	PC3	M33	Pid glypican 1pathway	2	27	267	26246	7.28145	0.0306186	0.146372	FGR,FYN
PID	Neg	PC3	M69	Pid reelin pathway	2	28	267	26246	7.0214	0.0327566	0.152864	RAPGEF1,FYN
PID	Neg	PC3	M207	Pid retinoic acid pathway	2	30	267	26246	6.55331	0.0372014	0.162033	NCOR2,MAPK1
PID	Neg	PC3	M76	Pid p38 alpha beta pathway	2	30	267	26246	6.55331	0.0372014	0.162033	FGR,FYN
PID	Neg	PC3	M257	Pid ephrinb rev pathway	2	30	267	26246	6.55331	0.0372014	0.162033	FGR,FYN
PID	Neg	PC3	M108	Pid netrin pathway	2	32	267	26246	6.14373	0.0418625	0.178371	FYN,MAPK1
PID	Neg	PC3	M233	Pid epo pathway	2	33	267	26246	5.95755	0.0442708	0.184619	RAPGEF1,PLCG2
PID	Neg	PC3	M30	Pid hdac classii pathway	2	34	267	26246	5.78233	0.0467293	0.186917	NCOR2,GNG2
PID	Neg	PC3	M270	Pid mapk trk pathway	2	34	267	26246	5.78233	0.0467293	0.186917	MAPK1,RPS6KA5
PID	Neg	PC3	M197	Pid hiv nef pathway	2	35	267	26246	5.61712	0.0492367	0.193008	FASLG,CD247
