# Supplementary material for: Epigenetic signature of human immune aging in the GESTALT study
Source: eLife. 2023 Aug 17;12:e86136. doi: 10.7554/eLife.86136 (PMC10506794; doi:10.7554/eLife.86136)
Supplement: Supplementary file 3. — The age-associated probes were identified from beta-regression (FDR p < 0.05). [file elife-86136-supp3.xlsx]

## Sheet: Table S3
Supplementary File 3: Distribution of β-coefficient for probes significantly changing with age in the immune cells.
	BN		CD4N		CD8N		granulocytes		monocytes		NK
β-estimate	hypoage*	hyperage**	hypoage	hyperage	hypoage	hyperage	hypoage	hyperage	hypoage	hyperage	hypoage	hyperage
<0.01	5418	3558	63185	40787	1446	1576	4077	1211	7344	5186	3509	506
0.01-0.02	1018	287	321	274	379	122	525	116	824	211	609	109
0.02-0.03	63	17	56	21	24	5	24	4	46	14	28	7
>0.03	8	1	3	1	1	0	1	0	3	0	2	1
Total	6507	3863	63565	41083	1850	1703	4627	1331	8217	5411	4148	623
hypoage*- probes hypomethylated with age
hyperage*- probes hypermethylated with age
