# Supplementary material for: Epigenetic signature of human immune aging in the GESTALT study
Source: eLife. 2023 Aug 17;12:e86136. doi: 10.7554/eLife.86136 (PMC10506794; doi:10.7554/eLife.86136)
Supplement: Supplementary file 5. — The list of top 15 and top 50 age-associated hypo- and hypermethylated genes derived from the most significant age-associated probes in each cell type. [file elife-86136-supp5.xlsx]

## Sheet: Table S5
Supplementary File 5- Top 15 to top 50 age-hypo and hypermethylated genes in each cell type
	BN	CD4N	CD8N	monocytes	NK	granulocytes
Top15 genes hypomethylated with age	THSD4	PDCD1LG2	CCDC102B	FLT1	NFIA	CCDC102B
	CCDC102B	PRNT	HMGA2	EGFEM1P	NPAS3	SEMA7A
	EGFEM1P	EFNA5	CSNK1D	CCDC102B	CCDC102B	IL21R
	NFIA	ADAM11	PAK6	THSD4	APOL1	LAG3
	ARHGAP22	CCDC102B	ABCC4	STPG1	DCHS2	LMNA
	PAK6	EBF1	EDARADD	PGLYRP2	THSD4	PDCD1LG2
	FJX1	CNTN2	NWD1	ASL	EDARADD	SLC25A22
	SLC2A13	LRP5	PDE1C	NRM	NWD1	STPG1
	HMGA2	F5	THSD4	NOX3	ACSS3	THSD4
	KRT17	TSPAN1	HLA-DPB1	C11orf49	ASPA	LDB2
	VPS52	B3GALT4	MAP1B	SP1	P3H2	SAMD14
	NPAS3	MTA1	NPAS3	NPAS3	FLJ23834	C11orf49
	MAP1B	KCNA3	PI4KB	MAP1B	SIGIRR	DNER
	AKAP8L	TRAF3IP3	EIF1	ADGRB2	PTGDS	STOML1
	ABCC4	GATAD2A	CNTN4	CSNK1D	RNF182	RARRES3
	genes observed in 5 or more cell types
	BN	CD4N	CD8N	monocytes	NK	granulocytes
Top 15 genes hypermethylated with age	ELOVL2	CNGA3	ELOVL2	ELOVL2	ELOVL2	ELOVL2
	FHL2	NLGN1	GPR158	LHFPL4	FHL2	LHFPL4
	CILP2	FAM181B	TRIM59	GPR78	OTUD7A	CHGA
	TRIM59	VGLL4	RPA2	SCGN	GPR158	SOBP
	LHFPL4	RPA2	ALDH1A2	OTUD7A	SCGN	GPR158
	STXBP5L	TBR1	KLF14	SLC12A5	C17orf104	PRRT4
	CHGA	LOC100130476	GPR62	CHGA	VGF	KLF14
	GPR78	SHANK1	SYNGR3	CNGA3	GPR176	SLC12A5
	OTUD7A	TJP1	ALX3	GPR158	CHGA	DIO3
	GPR158	ELOVL2	LHFPL4	FHL2	NXPH1	BOK
	PC	KLF14	LRP5	GLRA1	LHFPL4	SCGN
	NEFM	CALB1	SP8	ST8SIA3	TRIM59	SYT14
	VGF	UTRN	ADCY5	ZYG11A	CALB1	PRLHR
	AFAP1	MAP3K8	FHL2	KLF14	KLF14	NXPH1
	KLF14	DBC1	PPM1E	LINC00577	PENK	GLRA1
	genes observed in 5 or more cell types
	BN	CD4N	CD8N	monocytes	NK	granulocytes
Top 50 genes hypomethylated with age	ABCC4	ADAM11	ABCC4	FLT1	ABLIM1	ACSS3
	ACSS3	AIM1	ACBD4	ADGRB2	ACACA	ARAP2
	AKAP8L	ATP6V1H	AKAP8L	ARHGAP22	ACSS3	BMP2
	ALK	AUTS2	ARHGAP22	ASL	AKAP8L	C11orf49
	ANKRD11	B3GALT4	C16orf57	BCMO1	APOL1	CALML6
	ARHGAP22	BIN3	C2orf24	BHLHE41	ASPA	CC2D2A
	BAT3	C1R	CCDC102B	C11orf49	BCL6B	CCDC102B
	BCMO1	C2orf24	CNTN4	CABLES1	BCMO1	CD274
	BEGAIN	CCDC102B	CSNK1D	CALHM2	BEGAIN	CFLAR
	BMPER	CNTN2	DNAH9	CALML6	CBFA2T2	CHRND
	CCDC102B	COL16A1	EDARADD	CBFA2T2	CCDC102B	COPS4
	CHST3	CTBP2	EGFEM1P	CCDC102B	CNTNAP2	DNER
	COL4A2	CTLA4	EIF1	CPED1	CRYL1	EDARADD
	CPED1	DSG4	EIF3L	CSF1	DCHS2	EGFEM1P
	DUSP16	EBF1	FAM65C	CSNK1D	EDARADD	F5
	EDARADD	EFNA5	HLA-DPB1	DPYSL5	EGFEM1P	FGF14
	EGFEM1P	EHD1	HMGA2	DUSP16	EHMT2	GIT1
	FGF14	ERMN	IL2RA	EDARADD	EIF4G3	GLRA3
	FJX1	F5	IPO8	EGFEM1P	FAH	IGDCC4
	FLT1	FAM219A	LDLRAD3	FJX1	FLJ23834	IL21R
	HEPHL1	FAM89B	LIMCH1	FOXP1	FLJ39609	JPH1
	HMGA2	GATAD2A	LINC01412	GLRA3	FOXP1	KALRN
	IFT122	GLB1	LOC100130581	GPR177	GPR177	KIAA1462
	KCNJ10	GPR123	LOC101929608	IMMP2L	KIAA1755	KIAA1755
	KRT17	HERC1	MAP1B	IQCE	LINC01412	LAG3
	LGR6	IFI35	MAST2	KCNJ10	LMCD1-AS1	LDB2
	LINC01412	IFRD2	MBP	KCNK10	LOC101929710	LMNA
	MAP1B	KCNA3	MCM10	LDB2	NFIA	LOC101929710
	MBP	KCNAB1	NFIA	LMNA	NOSTRIN	LOC284950
	MPP6	LINC-PINT	NOD2	MAP1B	NPAS3	LYPLAL1
	MTMR3	LRP5	NPAS3	MASP1	NRP1	MVB12B
	NFIA	MAST3	NPY	MKLN1	NT5DC1	NEURL1-AS1
	NLRP3	MLF2	NRXN3	NEURL1-AS1	NWD1	NPAS3
	NOX3	MTA1	NWD1	NOX3	P3H2	NRG2
	NPAS3	MYLK	ODZ2	NPAS3	PAK6	PDCD1LG2
	NRXN3	NPEPPS	OSBPL6	NRM	PCED1A	PITPNM2
	NWD1	PDCD1LG2	PAK6	NWD1	PHKG1	POLR3GL
	PAK6	PDE4DIP	PDE1C	OPN3	PI4KB	PSD
	PGLYRP2	PRNT	PI4KB	PAK6	PTGDS	PXN
	PLEKHS1	RCAN1	RHBDL3	PGLYRP2	PXN	RARRES3
	RECQL5	RNASEL	RPS6KA1	PLIN5	RNF182	SAMD14
	RXFP2	SEPTIN9	STMN2	RHBDL3	SETBP1	SEMA7A
	SLC12A8	SLC25A22	TECR	RNF180	SIGIRR	SLC25A21-AS1
	SLC12A9	SLC35F3	THSD4	SHBG	SLC25A22	SLC25A22
	SLC2A13	SLC38A7	TIAL1	SLC2A13	SLC2A13	STOML1
	THSD4	SYPL1	TRPV4	SP1	SLIT3	STPG1
	TIAL1	TMEM105	TSPO	STMN2	SOCS3	THSD4
	TRIP6	TRAF3IP3	UFD1L	STPG1	THSD4	TMEM62
	VPS52	TSPAN1	WDR17	THSD4	TRPV4	UFD1L
	ZEB2-AS1	WBP2	ZC3H12D	TMEM111	ZFPM2	VAT1L
	genes observed in 5 or more cell types
	BN	CD4N	CD8N	monocytes	NK	granulocytes
Top 50 genes hypermethylated with age	ELOVL2	CNGA3	ELOVL2	ELOVL2	ELOVL2	ELOVL2
	FHL2	NLGN1	GPR158	LHFPL4	FHL2	LHFPL4
	CILP2	FAM181B	TRIM59	GPR78	OTUD7A	CHGA
	TRIM59	VGLL4	RPA2	SCGN	GPR158	SOBP
	LHFPL4	RPA2	ALDH1A2	OTUD7A	SCGN	GPR158
	STXBP5L	TBR1	KLF14	SLC12A5	C17orf104	PRRT4
	CHGA	LOC100130476	GPR62	CHGA	VGF	KLF14
	GPR78	SHANK1	SYNGR3	CNGA3	GPR176	SLC12A5
	OTUD7A	TJP1	ALX3	GPR158	CHGA	DIO3
	GPR158	ELOVL2	LHFPL4	FHL2	NXPH1	BOK
	PC	KLF14	LRP5	GLRA1	LHFPL4	SCGN
	NEFM	CALB1	SP8	ST8SIA3	TRIM59	SYT14
	VGF	UTRN	ADCY5	ZYG11A	CALB1	PRLHR
	AFAP1	MAP3K8	FHL2	KLF14	KLF14	NXPH1
	KLF14	DBC1	PPM1E	LINC00577	PENK	GLRA1
	SLC12A5	CACNA1I	PRLHR	DIO3	ZYG11A	NEFM
	CBX4	IQSEC3	FOXD1	C11orf85	BVES-AS1	TRIM59
	LOC100128811	SLC12A5	DMRTA2	TRIM59	SLC6A4	NHLRC1
	PENK	ZBTB16	TBR1	PENK	MEIS3	GPR78
	SCG3	GNA12	SLC12A5	SMAD2	AFAP1	STXBP5L
	SCGN	AKNA	PTPRN	VGF	DFNB31	FHL2
	CALB1	CAPN3	CELF6	NEFM	DOCK9	CALB1
	ANKRD34B	CBX4	ANKRD34B	AVPR1A	PRRT4	ERRFI1
	PRLHR	STAT5B	PRRT4	EPHX3	PBX4	ANKRD34C
	LINC00577	CRH	DHX40	NCAN	BAIAP2L2	ALX3
	ACTL6B	PRLHR	ZIC1	CALB1	GPR78	ALDH1A2
	RPA2	PTPRN	COCH	NXPH1	DLX5	PENK
	ATP8A2	RAD51AP2	HTR7	MEIS3	SLC7A5P1	LINC00577
	SEMA6A	KIF1C	OTUD7A	PRRT4	NEFM	ANKRD34B
	TBR1	WDR1	C14orf106	IRX1	GLI3	LOC200726
	PTP4A1	FAM123C	NRIP3	ATP8A2	ANKRD34B	ST8SIA3
	NEUROD1	LINC01116	TRIL	SRRM4	SLC12A5	CACNG2
	LOC375196	RGS20	VGF	ANKRD34B	ZDBF2	UNC80
	BNC1	SFXN5	OBSCN	PRLHR	EPHX3	C11orf85
	ADRB1	PPP1R16B	SCG3	SYNGR3	HS3ST3B1	RANBP17
	IL4I1	CTSA	TNR	VSTM2A	SMAD2	PPP1R14A
	NRIP3	APOLD1	EPHX3	SYPL2	STXBP5L	RIMS2
	TRIL	JAK1	PTP4A1	ANKRD34C	PCSK1	EPHX3
	ZYG11A	PLD3	LRTM2	GRIA2	KCNS1	NEUROD1
	CLYBL	NR2F2	BCL6B	ALDH1A2	RPA2	CACNA1G
	SYNM	HMX2	BNC1	CACNG2	TBR1	DBC1
	ITFG1-AS1	YTHDF2	LOC100132215	KIAA1409	SP8	MIR9-3
	AVPR1A	MBNL2	PCDHGA4	UNC80	ITFG1-AS1	ZYG11A
	KCNC3	TRAPPC9	FOXE3	PCDHA7	CELF6	GREM1
	PRRT4	SLIT2	PAQR9	ALX3	ALDH1A2	OTUD7A
	GRIN2C	NBEA	CHGA	UNC5D	PPM1E	PTPRN2
	MEIS3	EVX2	PRKD1	ADRB1	HTR7	ATP8A2
	DOCK9	MMP24	EVX1-AS	SOX1	NRIP3	KCNC2
	PTPRN2	NR4A2	STAG3	ELTD1	SEMA6A	SCG3
	NXPH1	GSTO1	MYEF2	TBR1	BMP8A	CCDC33
	genes observed in 5 or more cell types
