# Supplementary material for: Epigenetic signature of human immune aging in the GESTALT study
Source: eLife. 2023 Aug 17;12:e86136. doi: 10.7554/eLife.86136 (PMC10506794; doi:10.7554/eLife.86136)
Supplement: Supplementary file 6. — Gene set enrichment analysis was performed on genes based on annotation of age-associated hypo- and hypermethylation probes commonly changing in five or more cell types. [file elife-86136-supp6.xlsx]

## Sheet: Table S6
Supplementary File 6: Detailed Gene Set Enrichment Analysis Output of genes annotated to shared age-associated hypo- or hypermethylated probes
Gene_Set	Group	ID	Pathway	b	B	n	N	E	p_Val	q_Val	Genes_in_Pathway
Hallmarks	common_hyper	M5957	Hallmark pancreas beta cells	6	40	226	26325	17.4723	1.1267e-06	5.63349e-05	PAX6,NEUROD1,PCSK1,SCGN,CHGA,SST
Reactome	common_hyper	M735	Reactome neuronal system	17	409	225	25982	4.79972	1.19439e-07	0.000191579	SYT7,RIMS1,KCNA7,SLC6A4,KCNC4,GRIA2,KCNS1,KCNC3,SLC6A3,GLRA1,CACNA1B,SHANK1,KCNC2,CACNG2,ADCY5,PPM1E,GRIN1
KEGG	common_hyper	M13380	Kegg neuroactive ligand receptor interaction	11	269	226	26361	4.76973	2.26784e-05	0.00421817	ADRB1,DRD2,SSTR2,PRLHR,NTSR2,GRIA2,HTR6,HTR7,AVPR1A,GLRA1,GRIN1
Reactome	common_hypo	M41809	Reactome rac1 gtpase cycle	13	184	426	25982	4.30912	1.1813e-05	0.00690097	PLEKHG6,NISCH,RAB7A,GIT1,MCF2L,DOCK4,ARHGAP22,PLD2,PAK6,ARHGAP17,KALRN,DLC1,ARHGAP12
Reactome	common_hypo	M26999	Reactome collagen biosynthesis and modifying enzymes	8	67	426	25982	7.28246	1.36945e-05	0.00690097	P3H2,COL1A1,COL6A1,ADAMTS3,COL6A3,COL22A1,COL8A2,COL15A1
Reactome	common_hypo	M27078	Reactome rho gtpase cycle	21	443	426	25982	2.8912	1.59842e-05	0.00690097	PLEKHG6,NISCH,ARHGEF10L,RAB7A,STMN2,GIT1,CCDC88A,MCF2L,DOCK4,NDUFA5,ARHGAP22,PLD2,PAK6,ARHGAP17,CDC42EP2,PLEKHG4B,KALRN,DLC1,ARHGAP12,KCTD13,SPTAN1
Reactome	common_hypo	M631	Reactome collagen formation	9	90	426	25982	6.09906	1.72094e-05	0.00690097	P3H2,COL1A1,LOXL4,COL6A1,ADAMTS3,COL6A3,COL22A1,COL8A2,COL15A1
KEGG	common_hypo	M16476	Kegg cell adhesion molecules cams	10	130	426	26361	4.76002	5.19505e-05	0.00966279	CD274,PDCD1LG2,CD4,NRXN3,HLA-DPB1,HLA-C,HLA-B,PTPRF,CNTNAP2,CNTN2
KEGG	common_hyper	M2890	Kegg calcium signaling pathway	8	176	226	26361	5.30189	0.000145947	0.0135731	ADRB1,GRIN1,CACNA1B,HTR6,HTR7,AVPR1A,CACNA1G,CACNA1I
Reactome	common_hypo	M19752	Reactome complement cascade	7	58	426	25982	7.36094	4.43453e-05	0.014226	CLU,MASP1,C5AR2,C1QC,C1R,C3AR1,CR1
WP	common_hyper	M39891	Wp genes controlling nephrogenesis	5	43	226	26124	13.441	3.41358e-05	0.0158808	FGF8,GDNF,HOXD11,NPHS1,GLI3
WP	common_hyper	M39607	Wp tgif disruption of shh signaling	3	9	226	26124	38.531	5.16449e-05	0.0158808	FOXG1,FGF8,GLI3
WP	common_hyper	M39373	Wp sudden infant death syndrome sids susceptibility pathways	8	162	226	26124	5.70829	8.73712e-05	0.0179111	SST,SSTR2,TP73,PHOX2B,SLC6A4,NEUROD1,GRIN1,TAC1
Reactome	common_hypo	M27812	Reactome collagen chain trimerization	6	44	426	25982	8.3169	7.81446e-05	0.0208907	COL1A1,COL6A1,COL6A3,COL22A1,COL8A2,COL15A1
Reactome	common_hyper	M1056	Reactome voltage gated potassium channels	5	43	225	25982	13.4274	3.42944e-05	0.0211931	KCNA7,KCNC4,KCNS1,KCNC3,KCNC2
Reactome	common_hyper	M746	Reactome signaling by gpcr	18	696	225	25982	2.98644	3.9638e-05	0.0211931	TAC1,ADRB1,PDE4C,PRLHR,RGS22,WNT2B,HTR7,DRD2,OBSCN,SST,HTR6,GPR176,AVPR1A,NTSR2,GPR25,ADCY5,SSTR2,PENK
Hallmarks	common_hypo	M5909	Hallmark myogenesis	11	200	427	26325	3.39081	0.000451804	0.0225902	TNNT3,MYL3,COL15A1,COL6A3,NAV2,CLU,COL1A1,NQO1,SPTAN1,ABLIM1,APP
Hallmarks	common_hypo	M5902	Hallmark apoptosis	9	161	427	26325	3.44633	0.00130627	0.0257446	SPTAN1,PDGFRB,TSPO,CLU,LMNA,ENO2,APP,SOD2,BMP2
Hallmarks	common_hypo	M5893	Hallmark mitotic spindle	10	198	427	26325	3.11369	0.00154467	0.0257446	NUMA1,KIF5B,CDC42EP2,CCDC88A,DOCK4,CENPE,KIF3C,SPTAN1,PXN,CSNK1D
WP	common_hypo	M39649	Wp complement and coagulation cascades	7	58	426	26124	7.40117	4.28531e-05	0.0263546	F5,CR1,C1QC,C1R,C3AR1,CLU,MASP1
WP	common_hyper	M39585	Wp monoamine gpcrs	4	33	226	26124	14.0113	0.000183275	0.0281786	HTR7,HTR6,ADRB1,DRD2
Reactome	common_hyper	M27120	Reactome thyroxine biosynthesis	3	10	225	25982	34.6427	7.35235e-05	0.0294829	DUOX1,DUOX2,DIO3
WP	common_hyper	M39575	Wp ectoderm differentiation	7	142	226	26124	5.69824	0.000244526	0.0300767	FHL2,SIX6,ELOVL2,CLVS1,GLI3,NR2F2,PAX6
Hallmarks	common_hypo	M5942	Hallmark uv response dn	8	144	427	26325	3.42506	0.00248546	0.0310683	ABCC1,MAP1B,KCNMA1,NRP1,COL1A1,PDGFRB,KALRN,DLC1
PID	common_hypo	M160	Pid avb3 integrin pathway	7	74	427	26458	5.86132	0.000192657	0.0377608	PXN,PI4KB,COL8A2,COL6A3,COL6A1,COL15A1,COL1A1
Reactome	common_hyper	M15514	Reactome transmission across chemical synapses	10	268	225	25982	4.30879	0.000123863	0.0393883	RIMS1,SLC6A4,GRIA2,SLC6A3,GLRA1,CACNA1B,CACNG2,ADCY5,PPM1E,GRIN1
Reactome	common_hyper	M18334	Reactome class a 1 rhodopsin like receptors	11	329	225	25982	3.86088	0.000150424	0.0393883	TAC1,ADRB1,PRLHR,HTR7,DRD2,SST,HTR6,AVPR1A,NTSR2,SSTR2,PENK
Reactome	common_hyper	M27318	Reactome synthesis secretion and inactivation of glucose dependent insulinotropic polypeptide gip	3	13	225	25982	26.6482	0.000171894	0.0393883	PAX6,GATA4,PCSK1
Hallmarks	common_hypo	M5930	Hallmark epithelial mesenchymal transition	9	199	427	26325	2.78824	0.00539205	0.0463976	FBN1,COL1A1,COL6A3,TPM1,SLIT3,COL8A2,SCG2,ENO2,PDGFRB
Hallmarks	common_hypo	M5921	Hallmark complement	9	200	427	26325	2.7743	0.00556772	0.0463976	C1R,F5,C1QC,CR1,CLU,ZFPM2,SH2B3,L3MBTL4,DOCK4
INDEX
b	number of genes from input list significantly associated with the particular pathway
B	number of genes from background list(all EPIC probes) significantly associated with the particular pathway
n	total number of genes from input list associated with the particular pathway
N	total number of genes from background list(all EPIC probes) associated with the particular pathway
E	enrichment score
p_Val	enrichment p value
q_Val	enrichment adjusted q value
