# Supplementary material for: Epigenetic signature of human immune aging in the GESTALT study
Source: eLife. 2023 Aug 17;12:e86136. doi: 10.7554/eLife.86136 (PMC10506794; doi:10.7554/eLife.86136)
Supplement: Supplementary file 7. — HOMER de novo analysis was performed to identify the top 5 TF motifs within 50 bp of age-associated hypo- and hypermethylated sites in each of the six cell types. [file elife-86136-supp7.xlsx]

## Sheet: TableS7
Supplementary File 7: HOMER analysis of age-assocaited methylated sites + 50bpfor transcription factor motifs
age-hypomethylated probes
B	CD4	CD8	granulocytes	monocytes	NK
HIF1a/ARNT(bHLH),1e-158	ARNT(bHLH),1e-2246	Homez/Npas(bHLH),1e-25	Arnt,1e-122	Arnt,1e-149	ARNT::HIF1A,1e-75
CTCF(Zf),1e-36	Fra1(bZIP),1e-261	Smad3(MAD),1e-19	CTCF(Zf),1e-23	CTCF(Zf),1e-61	Fosl2(bZIP),1e-22
NFIX,1e-30	MYC,1e-30	E2A(bHLH),1e-18	Plagl1,1e-17	Fli1(ETS),1e-22	NEUROD1,1e-20
EWS:FLI1-fusion(ETS),1e-161	SP9,1e-93	Sox12,1e-16	TBX20,1e-14	Stat3(Stat),1e-20	CTCF(Zf),1e-19
Fos(bZIP),1e-20	ZNF416(Zf),1e-79	BATF::JUN,1e-14	Sox9(HMG),1e-14	Arid3a,1e-20	E2F6(E2F),1e-19
age-hypermethylated probes
B	CD4	CD8	granulocytes	monocytes	NK
FOSL2:JUNB,1e-26	Gmeb/Sp100,1e-562	REST,1e-23	REST,1e-31	Elk4(ETS),1e-83	REST,1e-31
REST,1e-25	ELF3,1e-121	Elk4(ETS),1e-20	ZBTB12,1e-20	RUNX2,1e-32	E2F3,1e-18
Gmeb/Sp100,1e-19	RUNX1(Runt),1e-102	Mafb,1e-18	MafA(bZIP),1e-18	REST,1e-27	ZNF669(Zf),1e-17
Bcl6(Zf),1e-17	PBX2,1e-81	Zfp691,1e-17	BARHL1,1e-16	Stat5,1e-19	HINFP(Zf),1e-15
GLIS3(Zf),1e-17	REST,1e-73	Zbtb12,1e-16	PRDM4,1e-16	Tcfap2b,1e-18	Rfxdc2,1e-15
