# Supplementary material for: Epigenetic signature of human immune aging in the GESTALT study
Source: eLife. 2023 Aug 17;12:e86136. doi: 10.7554/eLife.86136 (PMC10506794; doi:10.7554/eLife.86136)
Supplement: Supplementary file 8. — RNA-Seq data were used to look into the gene expression change of three selected transcription factors (TFs; ARNT, CTCF, and REST) with age. These TF motifs are most commonly associated with the age-related methylated sites in all immune cells. The mapping rates along with the Kallisto TPM normalized values for the three TFs for each cell type in each of the donors have been shown. [file elife-86136-supp8.xlsx]

## Sheet: TableS8
Supplementary File 8- Average read depths and Kallisto TPM normalized read counts of ARNT, CTCF and REST for all the donors
celltype	age	sex	DonorID	Phase	ARNT	CTCF	REST	Mapping Rate	Intragenic Rate	Intergenic Rate
BN	AGE23	M	Gt022	PH1	62.3682	34.6348	21.7199	0.955278	0.967304	0.0315555
BN	AGE26	M	Gt020	PH1	75.7974	31.3483	14.9366	0.938523	0.96272	0.0360469
BN	AGE28	M	Gt001	PH1	30.1883	17.9857	12.8119	0.949515	0.972939	0.0254412
BN	AGE31	M	Gt005	PH1	80.3889	47.2071	41.0351	0.949403	0.959287	0.0395
BN	AGE31	M	Gt025	PH1	54.9655	33.9614	18.8627	0.952836	0.95562	0.0431541
BN	AGE38	F	Gt016	PH1	102.141	39.4722	39.0775	0.96616	0.958778	0.0402478
BN	AGE42	M	Gt024	PH1	76.3783	24.4505	19.082	0.919092	0.956318	0.0428791
BN	AGE45	M	Gt017	PH1	47.7176	31.4382	21.8583	0.950164	0.95781	0.0408895
BN	AGE45	M	Gt030	PH1	64.5372	22.1902	19.8546	0.933592	0.957936	0.041247
BN	AGE51	M	Gt015	PH1	66.7753	39.517	29.6334	0.950608	0.95852	0.040474
BN	AGE52	F	Gt027	PH1	97.2027	38.9146	29.5484	0.954745	0.952475	0.0462781
BN	AGE52	M	Gt007	PH1	92.7964	34.5456	40.7909	0.941567	0.955821	0.043391
BN	AGE57	M	Gt004	PH1	47.4925	27.1261	17.6761	0.944469	0.952463	0.0460366
BN	AGE58	F	Gt011	PH1	47.3132	31.8876	18.3954	0.94318	0.966	0.0325112
BN	AGE60	M	Gt013	PH1	57.4995	33.8173	24.709	0.955969	0.957756	0.0411475
BN	AGE61	F	Gt003	PH1	66.0595	43.7407	35.7919	0.953407	0.958087	0.0407456
BN	AGE65	F	Gt033	PH1	126.555	38.7371	26.9392	0.948976	0.963782	0.0353417
BN	AGE67	M	Gt002	PH1	53.1329	33.2188	22.8288	0.952087	0.96018	0.0386949
BN	AGE73	F	Gt018	PH1	70.4061	40.4703	30.0785	0.950463	0.96048	0.0382523
BN	AGE72	M	Gt014	PH1	79.1413	26.4807	18.9745	0.950168	0.961022	0.0378973
BN	AGE78	F	Gt035	PH1	114.304	45.4253	35.8051	0.964756	0.959347	0.0397872
BN	AGE80	F	Gt032	PH1	109.207	48.6454	33.223	0.967921	0.957121	0.0418964
BN	AGE81	M	Gt029	PH1	88.1418	34.4194	21.1969	0.961768	0.961187	0.0376625
BN	AGE83	M	Gt026	PH1	69.7876	29.238	16.6638	0.956003	0.95485	0.0443216
CD4N	AGE23	M	Gt022	PH1	90.2719	22.0023	22.7317	0.934793	0.938612	0.0607419
CD4N	AGE26	M	Gt020	PH1	58.4827	17.6907	6.4424	0.957339	0.960588	0.0385125
CD4N	AGE28	M	Gt001	PH1	79.2106	27.6725	13.2618	0.949103	0.966379	0.032533
CD4N	AGE31	M	Gt005	PH1	77.877	39.215	24.2455	0.938774	0.952603	0.0465862
CD4N	AGE31	M	Gt025	PH1	113.211	35.941	39.5271	0.951889	0.941845	0.0571389
CD4N	AGE38	F	Gt016	PH1	43.9092	18.3091	8.54546	0.948283	0.948674	0.0502849
CD4N	AGE42	M	Gt024	PH1	47.5959	14.3583	14.9559	0.936596	0.94116	0.05783
CD4N	AGE45	M	Gt030	PH1	151.544	26.6332	26.5293	0.966202	0.950981	0.0484031
CD4N	AGE45	M	Gt017	PH1	16.8734	7.20991	3.59708	0.935344	0.973825	0.0248806
CD4N	AGE51	M	Gt015	PH1	136.141	27.1151	25.3204	0.947757	0.944816	0.0544885
CD4N	AGE52	F	Gt027	PH1	168.269	39.8472	36.3609	0.960964	0.938402	0.0609602
CD4N	AGE52	M	Gt007	PH1	92.8273	25.6883	15.7339	0.940799	0.952296	0.0469801
CD4N	AGE57	M	Gt004	PH1	54.8402	10.7685	5.80081	0.938097	0.956466	0.0426998
CD4N	AGE58	F	Gt011	PH1	89.9349	34.4517	24.5454	0.956205	0.944832	0.0542005
CD4N	AGE60	M	Gt013	PH1	73.3473	31.1682	22.1284	0.955053	0.939651	0.0594462
CD4N	AGE61	F	Gt003	PH1	100.638	21.8573	10.321	0.959213	0.965874	0.0331971
CD4N	AGE65	F	Gt033	PH1	148.463	26.4699	23.9587	0.965521	0.95333	0.0460985
CD4N	AGE67	M	Gt002	PH1	67.781	18.3219	7.79182	0.948161	0.949711	0.0493748
CD4N	AGE73	F	Gt018	PH1	6.58356	5.28439	2.70494	0.939432	0.97575	0.0229639
CD4N	AGE72	M	Gt014	PH1	111.638	44.9374	40.9948	0.952826	0.94142	0.0577263
CD4N	AGE78	F	Gt035	PH1	148.803	27.0688	21.136	0.942002	0.941896	0.0574398
CD4N	AGE80	F	Gt032	PH1	121.442	30.2505	25.0333	0.966625	0.949405	0.0498964
CD4N	AGE81	M	Gt029	PH1	141.631	22.6796	17.8597	0.931156	0.946536	0.0527755
CD4N	AGE83	M	Gt026	PH1	81.1506	16.7125	23.6871	0.910744	0.936641	0.0626641
CD8N	AGE23	M	Gt022	PH1	109.184	40.6475	20.725	0.96196	0.948571	0.0507465
CD8N	AGE26	M	Gt020	PH1	95.2814	41.5738	34.6738	0.953905	0.952692	0.0463373
CD8N	AGE28	M	Gt001	PH1	76.537	27.6457	12.8284	0.948316	0.948313	0.0508317
CD8N	AGE31	M	Gt005	PH1	44.2456	25.8409	15.0088	0.94477	0.964982	0.033865
CD8N	AGE31	M	Gt025	PH1	98.5157	39.0809	32.3318	0.948018	0.944495	0.0544873
CD8N	AGE38	F	Gt016	PH1	110.795	47.6018	36.2922	0.957321	0.951167	0.048056
CD8N	AGE42	M	Gt024	PH1	138.292	31.967	26.0869	0.947645	0.947554	0.0516989
CD8N	AGE45	M	Gt030	PH1	149.731	39.8845	26.5102	0.958456	0.953629	0.0457246
CD8N	AGE45	M	Gt017	PH1	122.655	38.2927	26.2441	0.955637	0.955307	0.0438639
CD8N	AGE51	M	Gt015	PH1	113.96	36.5922	24.8312	0.953805	0.94954	0.0495474
CD8N	AGE52	F	Gt027	PH1	118.12	44.3322	27.3101	0.964016	0.954278	0.044952
CD8N	AGE52	M	Gt007	PH1	144.324	33.4919	19.7737	0.937306	0.947845	0.0514648
CD8N	AGE57	M	Gt004	PH1	78.6991	30.6506	26.9535	0.932208	0.949058	0.0500689
CD8N	AGE58	F	Gt011	PH1	56.9553	30.811	21.945	0.944444	0.958554	0.040401
CD8N	AGE60	M	Gt013	PH1	91.6169	37.2712	16.4765	0.959754	0.961281	0.0379203
CD8N	AGE61	F	Gt003	PH1	35.3592	20.9063	12.3251	0.940574	0.964969	0.0338871
CD8N	AGE65	F	Gt033	PH1	128.851	31.5543	27.5366	0.927197	0.943121	0.0561591
CD8N	AGE67	M	Gt002	PH1	107.689	37.0004	16.7786	0.963076	0.951693	0.047586
CD8N	AGE73	F	Gt018	PH1	52.4828	28.4247	19.2034	0.954644	0.964528	0.0345959
CD8N	AGE72	M	Gt014	PH1	115.23	41.3657	26.2176	0.965839	0.962366	0.0367663
CD8N	AGE78	F	Gt035	PH1	143.059	41.664	35.3574	0.964985	0.944184	0.0550486
CD8N	AGE80	F	Gt032	PH1	104.611	48.7887	31.3518	0.957607	0.949111	0.0499421
CD8N	AGE81	M	Gt029	PH1	149.502	50.0091	47.6137	0.97035	0.944485	0.0549132
CD8N	AGE83	M	Gt026	PH1	110.845	31.643	28.8972	0.931953	0.927795	0.0714293
GRANULOCYTES	AGE23	M	Gt022	PH1	10.44	8.66777	14.3565	0.915213	0.928935	0.0698611
GRANULOCYTES	AGE26	M	Gt020	PH1	7.86289	4.92568	25.3774	0.914079	0.920906	0.0780594
GRANULOCYTES	AGE31	M	Gt025	PH1	10.2961	6.93311	18.3145	0.933125	0.908279	0.0909193
GRANULOCYTES	AGE42	M	Gt024	PH1	18.2336	10.6957	20.3747	0.942259	0.927551	0.0716245
GRANULOCYTES	AGE45	M	Gt030	PH1	18.7148	10.251	21.5965	0.936052	0.912804	0.0862348
GRANULOCYTES	AGE52	F	Gt027	PH1	16.1565	7.98832	8.10207	0.939365	0.932702	0.0665062
GRANULOCYTES	AGE73	F	Gt018	PH1	9.58945	4.92118	13.1336	0.931192	0.902883	0.0961698
GRANULOCYTES	AGE78	F	Gt035	PH1	13.9424	6.32384	6.6047	0.927367	0.944201	0.0549298
GRANULOCYTES	AGE80	F	Gt032	PH1	21.8441	8.25285	20.3132	0.902398	0.93688	0.0619728
GRANULOCYTES	AGE81	M	Gt029	PH1	19.7237	13.9499	22.7074	0.932963	0.941066	0.0580549
GRANULOCYTES	AGE83	M	Gt026	PH1	11.3105	6.36356	15.8761	0.92334	0.9325	0.0665468
MONOCYTES	AGE23	M	Gt022	PH1	23.2876	16.2539	28.6001	0.941858	0.968782	0.0301149
MONOCYTES	AGE26	M	Gt020	PH1	45.2553	24.5674	56.8154	0.940366	0.961381	0.0374077
MONOCYTES	AGE28	M	Gt001	PH1	25.0741	14.7114	29.0982	0.946457	0.970326	0.0286018
MONOCYTES	AGE31	M	Gt005	PH1	23.9631	14.8045	26.1886	0.949342	0.966464	0.0325496
MONOCYTES	AGE31	M	Gt025	PH1	39.0801	20.5631	56.186	0.95085	0.956784	0.0422812
MONOCYTES	AGE38	F	Gt016	PH1	26.4484	16.9639	38.8929	0.941254	0.955163	0.0436455
MONOCYTES	AGE42	M	Gt024	PH1	47.1682	24.017	101.862	0.959157	0.95367	0.0455483
MONOCYTES	AGE45	M	Gt030	PH1	73.8103	25.5195	52.0401	0.955621	0.957691	0.0414421
MONOCYTES	AGE45	M	Gt017	PH1	28.4473	12.2708	24.8483	0.94821	0.951948	0.0470682
MONOCYTES	AGE51	M	Gt015	PH1	22.1359	16.2455	25.6155	0.950787	0.960942	0.0380648
MONOCYTES	AGE52	F	Gt027	PH1	83.249	17.1802	47.7178	0.937889	0.956564	0.0427713
MONOCYTES	AGE52	M	Gt007	PH1	50.8649	18.0656	41.0924	0.95982	0.969453	0.0297165
MONOCYTES	AGE57	M	Gt004	PH1	58.0789	16.3706	34.5448	0.944905	0.962019	0.0371871
MONOCYTES	AGE58	F	Gt011	PH1	46.1691	16.4216	27.8638	0.955831	0.965126	0.0340168
MONOCYTES	AGE60	M	Gt013	PH1	13.5338	9.1223	17.5026	0.940442	0.969529	0.0293625
MONOCYTES	AGE61	F	Gt003	PH1	32.5581	20.5446	43.1021	0.937609	0.950269	0.0487748
MONOCYTES	AGE65	F	Gt033	PH1	80.6571	25.6001	61.0453	0.960552	0.961964	0.0371207
MONOCYTES	AGE67	M	Gt002	PH1	49.3906	25.1282	44.4253	0.953246	0.961782	0.037207
MONOCYTES	AGE73	F	Gt018	PH1	20.1466	14.1096	30.5687	0.940604	0.96715	0.0317298
MONOCYTES	AGE72	M	Gt014	PH1	30.0036	15.9038	33.7024	0.942686	0.966587	0.0322334
MONOCYTES	AGE78	F	Gt035	PH1	83.7964	23.8384	53.4107	0.963634	0.961401	0.0378215
MONOCYTES	AGE80	F	Gt032	PH1	96.6413	22.3965	48.5386	0.927947	0.95838	0.0409097
MONOCYTES	AGE81	M	Gt029	PH1	92.7032	27.1712	69.6438	0.968335	0.963548	0.0357889
MONOCYTES	AGE83	M	Gt026	PH1	67.4181	29.2918	59.8492	0.964143	0.966388	0.0327
NK	AGE23	M	Gt022	PH1	166.678	46.7721	48.5101	0.955422	0.964097	0.035136
NK	AGE26	M	Gt020	PH1	209.166	58.5316	45.3139	0.966729	0.964308	0.0348396
NK	AGE28	M	Gt001	PH1	164.495	49.1178	40.0742	0.953315	0.963345	0.0357865
NK	AGE31	M	Gt005	PH1	146.376	57.332	46.6695	0.950326	0.960072	0.0387416
NK	AGE31	M	Gt025	PH1	156.292	55.7123	47.2524	0.957164	0.961252	0.037865
NK	AGE38	F	Gt016	PH1	151.485	52.7301	39.066	0.964284	0.965342	0.0336242
NK	AGE42	M	Gt024	PH1	157.276	33.4363	24.9018	0.966224	0.963974	0.0353265
NK	AGE45	M	Gt030	PH1	202.233	44.4886	49.1811	0.940168	0.952921	0.0463199
NK	AGE45	M	Gt017	PH1	97.0747	45.9186	46.0061	0.94227	0.961167	0.0377119
NK	AGE51	M	Gt015	PH1	221.396	51.7722	49.7858	0.959877	0.961247	0.0379751
NK	AGE52	F	Gt027	PH1	165.659	52.4133	38.4472	0.940065	0.948432	0.050805
NK	AGE52	M	Gt007	PH1	98.7443	20.2423	23.0567	0.94906	0.95239	0.0468173
NK	AGE57	M	Gt004	PH1	157.03	47.2854	32.2806	0.961968	0.961832	0.0372877
NK	AGE58	F	Gt011	PH1	157.239	55.2638	55.318	0.95764	0.961584	0.0376307
NK	AGE60	M	Gt013	PH1	140.741	48.3291	29.8509	0.957859	0.964576	0.0345362
NK	AGE61	F	Gt003	PH1	163.063	54.4512	35.8683	0.958011	0.961705	0.0373982
NK	AGE65	F	Gt033	PH1	208.056	57.1042	43.8633	0.969604	0.965844	0.0331786
NK	AGE67	M	Gt002	PH1	76.3008	41.7462	31.8631	0.947878	0.962753	0.0359658
NK	AGE73	F	Gt018	PH1	105.885	47.1891	41.585	0.94932	0.963107	0.0356654
NK	AGE72	M	Gt014	PH1	159.671	55.396	36.9836	0.964226	0.967203	0.0317252
NK	AGE78	F	Gt035	PH1	195.402	51.5627	43.5014	0.969694	0.961917	0.0372169
NK	AGE80	F	Gt032	PH1	191.142	49.855	53.7459	0.958378	0.954449	0.0448278
NK	AGE81	M	Gt029	PH1	136.104	34.7174	39.8869	0.913137	0.950986	0.0481792
NK	AGE83	M	Gt026	PH1	179.943	61.6696	56.6515	0.965373	0.954	0.0451972
BN	AGE22	M	Gt073	PH2	48.4053	21.1236	9.13301	0.925163	0.947034	0.0520161
BN	AGE25	F	Gt085	PH2	41.2202	20.7308	8.05632	0.931842	0.971337	0.0271853
BN	AGE25	M	Gt046	PH2	64.8912	30.225	19.0612	0.933601	0.921801	0.0771197
BN	AGE26	F	Gt051	PH2	44.8674	20.4166	8.01972	0.924533	0.937922	0.0609662
BN	AGE26	F	Gt045	PH2	47.5541	22.8924	15.6326	0.927284	0.941515	0.0574597
BN	AGE27	F	Gt055	PH2	111.187	43.8486	21.4693	0.946959	0.953902	0.0448504
BN	AGE31	F	Gt090	PH2	197.997	48.104	25.2045	0.966857	0.963331	0.0358537
BN	AGE33	M	Gt042	PH2	20.6781	13.874	10.3489	#N/A	#N/A	#N/A
BN	AGE35	M	Gt104	PH2	98.1465	39.7828	18.2845	0.938188	0.954992	0.0436747
BN	AGE37	M	Gt064	PH2	74.9057	31.3722	15.2659	0.93536	0.957177	0.0413435
BN	AGE38	M	Gt093	PH2	39.7005	23.4757	7.45081	0.916519	0.881935	0.116871
BN	AGE42	F	Gt059	PH2	141.318	57.4196	30.7637	0.961601	0.958326	0.0406421
BN	AGE47	F	Gt078	PH2	95.3179	43.1907	16.5777	0.945956	0.96611	0.0324134
BN	AGE47	M	Gt060	PH2	132.019	44.1479	20.158	0.955863	0.96228	0.0365861
BN	AGE52	F	Gt063	PH2	105.85	47.685	22.0206	0.955586	0.956608	0.0420881
BN	AGE52	M	Gt056	PH2	10.4579	20.2735	6.14873	0.927149	0.939057	0.0590132
BN	AGE54	M	Gt057	PH2	66.4859	16.1339	6.42527	0.936985	0.940858	0.0582693
BN	AGE62	F	Gt070	PH2	81.2897	24.7458	24.8724	0.963516	0.953389	0.0460376
BN	AGE63	F	Gt101	PH2	17.881	13.0274	5.74717	0.888354	0.816404	0.182229
BN	AGE63	M	Gt092	PH2	117.212	33.0754	19.5872	0.948359	0.954139	0.0448615
BN	AGE67	F	Gt080	PH2	129.12	51.7401	29.0004	0.963249	0.965591	0.0333514
BN	AGE69	F	Gt095	PH2	26.766	21.754	22.0217	0.917061	0.892344	0.106118
BN	AGE70	F	Gt089	PH2	122.159	50.2096	33.6861	0.961931	0.954141	0.0447903
BN	AGE70	M	Gt061	PH2	98.335	36.5034	15.5924	0.945099	0.960275	0.0383481
BN	AGE72	F	Gt071	PH2	80.4462	26.9415	12.1852	0.951459	0.946434	0.0524015
BN	AGE72	M	Gt084	PH2	126.783	46.8882	27.7628	0.967963	0.965087	0.0338759
BN	AGE72	M	Gt109	PH2	53.7323	27.6066	12.3301	0.92417	0.941808	0.056691
BN	AGE72	M	Gt065	PH2	83.5788	26.407	12.8393	0.942652	0.943186	0.0558495
BN	AGE76	M	Gt098	PH2	18.7261	11.5834	8.69289	0.891008	0.816699	0.181719
BN	AGE81	F	Gt083	PH2	104.394	34.566	18.4356	0.951382	0.954535	0.0444905
BN	AGE81	M	Gt110	PH2	35.3149	16.969	15.0668	0.895393	0.897531	0.101289
BN	AGE81	M	Gt108	PH2	28.3041	21.8939	12.7	0.924454	0.930274	0.0679733
CD4N	AGE22	M	Gt073	PH2	66.5498	45.9934	10.3145	0.929682	0.942663	0.0559013
CD4N	AGE25	F	Gt085	PH2	130.94	56.169	18.2921	0.954946	0.954505	0.044379
CD4N	AGE25	M	Gt046	PH2	136.556	48.9836	17.4241	0.951497	0.915743	0.0832945
CD4N	AGE26	F	Gt051	PH2	143.739	38.9394	8.44394	0.953452	0.936756	0.0623344
CD4N	AGE26	F	Gt045	PH2	253.787	53.7668	16.3359	0.956856	0.960482	0.0386808
CD4N	AGE27	F	Gt055	PH2	50.4146	27.3772	4.00927	0.950172	0.9688	0.030033
CD4N	AGE31	F	Gt090	PH2	180.525	45.9846	16.3774	0.953752	0.956127	0.0429801
CD4N	AGE33	M	Gt042	PH2	66.242	36.4454	9.40265	0.935114	0.942353	0.0562184
CD4N	AGE35	M	Gt104	PH2	10.5841	17.6876	3.79583	0.892476	0.715909	0.282542
CD4N	AGE37	M	Gt064	PH2	107.058	31.7771	10.2255	0.93742	0.937764	0.0612002
CD4N	AGE38	M	Gt093	PH2	21.1744	8.76659	3.54541	0.903265	0.871421	0.127152
CD4N	AGE42	F	Gt059	PH2	125.072	48.6578	20.8916	0.952201	0.951509	0.0475427
CD4N	AGE47	F	Gt078	PH2	38.9471	29.185	5.88346	0.924401	0.939938	0.0583739
CD4N	AGE47	M	Gt060	PH2	139.578	41.471	18.9011	0.944341	0.933974	0.0650037
CD4N	AGE52	F	Gt063	PH2	120.441	44.2929	16.5373	0.951647	0.958424	0.0404219
CD4N	AGE52	M	Gt056	PH2	158.013	25.5382	8.91926	0.937331	0.882628	0.116227
CD4N	AGE54	M	Gt057	PH2	115.955	46.679	11.963	0.944736	0.960019	0.0385417
CD4N	AGE62	F	Gt070	PH2	193.6	53.3414	20.6653	0.96416	0.957928	0.0411522
CD4N	AGE63	F	Gt101	PH2	33.8683	14.9516	7.28282	0.935861	0.945071	0.0534969
CD4N	AGE63	M	Gt092	PH2	94.9436	24.8822	11.6984	0.917611	0.920778	0.0778888
CD4N	AGE67	F	Gt080	PH2	57.5244	51.4512	18.676	0.921629	0.936185	0.0621052
CD4N	AGE69	F	Gt095	PH2	35.4092	14.5062	5.43408	0.91579	0.929579	0.0689649
CD4N	AGE70	M	Gt061	PH2	94.858	31.2388	11.73	0.921182	0.954517	0.043886
CD4N	AGE72	F	Gt071	PH2	166.902	55.4709	14.7915	0.960343	0.952738	0.0462827
CD4N	AGE72	M	Gt109	PH2	15.2522	4.20338	2.95732	0.892207	0.713573	0.284723
CD4N	AGE72	M	Gt084	PH2	68.4319	32.3112	7.50678	0.939023	0.959044	0.03947
CD4N	AGE72	M	Gt065	PH2	73.8511	46.6691	11.1012	0.936132	0.953851	0.044615
CD4N	AGE76	M	Gt098	PH2	57.4157	23.0627	8.55033	0.939003	0.952669	0.046154
CD4N	AGE81	F	Gt083	PH2	70.6243	25.5608	7.05624	0.939432	0.944716	0.0539452
CD4N	AGE81	M	Gt110	PH2	122.842	33.4479	13.4986	0.940373	0.936773	0.0621649
CD4N	AGE81	M	Gt108	PH2	56.6769	17.6614	7.55498	0.886867	0.835243	0.163274
CD8N	AGE22	M	Gt073	PH2	97.4238	32.3935	10.7744	0.948326	0.956741	0.0424135
CD8N	AGE25	F	Gt085	PH2	48.9038	15.1828	9.5472	0.942216	0.940531	0.0586572
CD8N	AGE25	M	Gt046	PH2	132.533	49.3533	21.6454	0.95063	0.949067	0.0499647
CD8N	AGE26	F	Gt051	PH2	48.1867	13.694	11.0884	0.914038	0.940549	0.0584559
CD8N	AGE26	F	Gt045	PH2	170.52	50.8883	25.6484	0.962895	0.951185	0.0479533
CD8N	AGE27	F	Gt055	PH2	23.66	16.512	5.18514	0.938134	0.961775	0.0368825
CD8N	AGE31	F	Gt090	PH2	73.5931	35.8306	9.79339	0.956899	0.966564	0.0323624
CD8N	AGE33	M	Gt042	PH2	99.7112	37.416	14.6225	0.949682	0.948981	0.0501445
CD8N	AGE35	M	Gt104	PH2	54.9358	7.67724	9.23683	0.902085	0.826305	0.17252
CD8N	AGE37	M	Gt064	PH2	111.132	31.3513	11.3711	0.958433	0.959958	0.0392233
CD8N	AGE38	M	Gt093	PH2	51.2602	22.0187	7.47084	0.934714	0.949797	0.0490816
CD8N	AGE42	F	Gt059	PH2	161.284	31.9239	12.8183	0.951033	0.944457	0.0547445
CD8N	AGE47	F	Gt078	PH2	53.2795	12.6227	2.34042	0.900707	0.920329	0.078468
CD8N	AGE47	M	Gt060	PH2	147.243	33.0523	12.1921	0.954054	0.958438	0.040572
CD8N	AGE52	F	Gt063	PH2	2.20237	6.52824	4.28415	0.919876	0.946505	0.051934
CD8N	AGE52	M	Gt056	PH2	98.4632	29.764	14.334	0.950725	0.889615	0.109437
CD8N	AGE54	M	Gt057	PH2	149.071	34.6792	11.9497	0.963598	0.959996	0.0392279
CD8N	AGE62	F	Gt070	PH2	93.5149	34.511	15.982	0.939387	0.957376	0.0415874
CD8N	AGE63	F	Gt101	PH2	158.323	51.5882	20.2804	0.960126	0.959289	0.0398796
CD8N	AGE63	M	Gt092	PH2	110.618	37.6953	11.1114	0.938823	0.946214	0.0528054
CD8N	AGE67	F	Gt080	PH2	106.403	40.4464	13.8261	0.950808	0.953195	0.0457509
CD8N	AGE69	F	Gt095	PH2	33.5875	6.06481	2.70408	0.885018	0.769711	0.228868
CD8N	AGE70	F	Gt089	PH2	163.594	40.1319	20.2471	0.956069	0.954998	0.0441397
CD8N	AGE70	M	Gt061	PH2	128.075	42.7387	19.9529	0.956046	0.954268	0.0447956
CD8N	AGE72	F	Gt071	PH2	128.034	51.9085	12.4611	0.961332	0.952729	0.0463402
CD8N	AGE72	M	Gt084	PH2	151.684	41.4959	23.3023	0.959532	0.957474	0.0416489
CD8N	AGE72	M	Gt109	PH2	45.2589	13.9795	5.60009	0.903558	0.844118	0.154751
CD8N	AGE72	M	Gt065	PH2	61.4742	18.6236	2.70197	0.900291	0.933432	0.065386
CD8N	AGE76	M	Gt098	PH2	125.381	34.2665	16.3481	0.946594	0.950412	0.0486571
CD8N	AGE81	F	Gt083	PH2	30.6937	14.9089	5.50139	0.908817	0.873943	0.124729
CD8N	AGE81	M	Gt110	PH2	153.531	35.4977	18.0005	0.954616	0.946536	0.0526949
CD8N	AGE81	M	Gt108	PH2	44.1045	12.7717	9.52169	0.907658	0.920353	0.0783799
GRANULOCYTES	AGE22	M	Gt073	PH2	24.2863	8.41434	11.0527	0.924402	0.946277	0.0526763
GRANULOCYTES	AGE25	F	Gt085	PH2	15.8059	8.37484	7.53067	0.919369	0.925479	0.0734354
GRANULOCYTES	AGE25	M	Gt046	PH2	48.7231	18.5107	8.28505	0.933143	0.948319	0.0506939
GRANULOCYTES	AGE26	F	Gt051	PH2	56.5655	17.5625	5.39855	0.92534	0.932768	0.0661744
GRANULOCYTES	AGE26	F	Gt045	PH2	29.9117	2.45303	11.0354	0.897478	0.910625	0.0879436
GRANULOCYTES	AGE27	F	Gt055	PH2	8.79223	4.05544	21.5033	0.8805	0.508229	0.489689
GRANULOCYTES	AGE31	F	Gt090	PH2	17.5161	8.05288	9.28142	0.918029	0.958511	0.040229
GRANULOCYTES	AGE33	M	Gt042	PH2	22.0804	14.4999	20.3256	0.922102	0.840253	0.158485
GRANULOCYTES	AGE35	M	Gt104	PH2	10.636	7.95566	10.418	0.881237	0.878455	0.120086
GRANULOCYTES	AGE37	M	Gt064	PH2	9.58004	5.4973	21.7341	0.860258	0.537667	0.460377
GRANULOCYTES	AGE38	M	Gt093	PH2	30.425	13.6349	10.1759	0.888365	0.896963	0.101428
GRANULOCYTES	AGE42	F	Gt059	PH2	32.7917	8.16566	8.81049	0.915595	0.891618	0.107206
GRANULOCYTES	AGE47	F	Gt078	PH2	22.8281	13.2086	9.50716	0.910587	0.917147	0.0815151
GRANULOCYTES	AGE47	M	Gt060	PH2	13.609	4.07531	8.61781	0.895342	0.863491	0.134847
GRANULOCYTES	AGE52	F	Gt063	PH2	40.4652	11.2576	13.6136	0.947905	0.958679	0.0404289
GRANULOCYTES	AGE52	M	Gt056	PH2	15.4056	1.85948	6.52619	0.858762	0.863001	0.135033
GRANULOCYTES	AGE54	M	Gt057	PH2	12.7579	6.58671	6.49355	0.926155	0.931744	0.0673001
GRANULOCYTES	AGE62	F	Gt070	PH2	36.4866	7.34765	7.95918	0.882624	0.77234	0.225973
GRANULOCYTES	AGE63	F	Gt101	PH2	15.8414	10.6092	6.18232	0.920011	0.94465	0.0541674
GRANULOCYTES	AGE63	M	Gt092	PH2	11.5132	11.8624	8.88975	0.898763	0.897236	0.101209
GRANULOCYTES	AGE67	F	Gt080	PH2	31.5132	5.76546	7.37337	0.900987	0.936518	0.0620452
GRANULOCYTES	AGE69	F	Gt095	PH2	20.9142	9.28064	14.0286	#N/A	#N/A	#N/A
GRANULOCYTES	AGE70	F	Gt089	PH2	59.5766	25.0467	17.3583	0.948985	0.958791	0.0399007
GRANULOCYTES	AGE70	M	Gt061	PH2	20.514	9.02625	5.25778	0.893497	0.825117	0.173492
GRANULOCYTES	AGE72	F	Gt071	PH2	28.8026	12.2483	10.3194	0.93468	0.949831	0.0491011
GRANULOCYTES	AGE72	M	Gt084	PH2	7.19554	5.39676	7.13543	0.89474	0.95139	0.0470119
GRANULOCYTES	AGE72	M	Gt109	PH2	10.5934	4.64561	8.61091	0.890128	0.78451	0.214062
GRANULOCYTES	AGE72	M	Gt065	PH2	30.6553	9.63706	14.7814	0.923137	0.937278	0.0615771
GRANULOCYTES	AGE76	M	Gt098	PH2	34.0544	14.032	13.4398	0.927071	0.946831	0.0519458
GRANULOCYTES	AGE81	F	Gt083	PH2	4.42091	6.89237	7.2189	0.810248	0.721444	0.27569
GRANULOCYTES	AGE81	M	Gt110	PH2	13.1421	6.38888	9.75889	0.892193	0.887338	0.11112
GRANULOCYTES	AGE81	M	Gt108	PH2	53.5935	20.4096	14.61	0.909166	0.912282	0.0863284
MONOCYTES	AGE22	M	Gt073	PH2	73.058	13.2732	21.2679	0.950634	0.969723	0.0293875
MONOCYTES	AGE25	F	Gt085	PH2	63.703	20.1969	38.5704	0.938996	0.96486	0.0340092
MONOCYTES	AGE25	M	Gt046	PH2	87.0326	25.9369	43.5341	0.953228	0.965943	0.0331912
MONOCYTES	AGE26	F	Gt051	PH2	51.6253	14.843	55.7682	0.963808	0.950242	0.0491854
MONOCYTES	AGE26	F	Gt045	PH2	53.5479	25.9623	52.6771	0.939525	0.96603	0.0327702
MONOCYTES	AGE27	F	Gt055	PH2	63.9895	20.8981	43.0922	0.962403	0.964128	0.0350018
MONOCYTES	AGE31	F	Gt090	PH2	21.3382	7.72174	10.2571	0.916076	0.917494	0.0812556
MONOCYTES	AGE33	M	Gt042	PH2	81.9633	31.9177	44.9754	0.960516	0.970394	0.028678
MONOCYTES	AGE35	M	Gt104	PH2	32.1203	13.72	13.8027	0.90731	0.926723	0.0720401
MONOCYTES	AGE37	M	Gt064	PH2	60.5484	14.8429	37.6339	0.938338	0.959908	0.0391086
MONOCYTES	AGE38	M	Gt093	PH2	80.571	21.3097	21.3425	0.949441	0.960167	0.0390514
MONOCYTES	AGE42	F	Gt059	PH2	29.3219	6.71533	7.79699	0.902925	0.960056	0.0390083
MONOCYTES	AGE47	F	Gt078	PH2	65.9968	18.0579	28.4241	0.953139	0.969423	0.0295681
MONOCYTES	AGE47	M	Gt060	PH2	52.8004	19.9616	28.7186	0.947063	0.968228	0.0308171
MONOCYTES	AGE52	M	Gt056	PH2	41.6677	22.0453	40.1795	0.936729	0.958068	0.0408951
MONOCYTES	AGE54	M	Gt057	PH2	41.7592	22.6902	40.3099	0.946046	0.966974	0.0318298
MONOCYTES	AGE62	F	Gt070	PH2	105.387	29.1808	37.3997	0.962584	0.96573	0.0333817
MONOCYTES	AGE63	F	Gt101	PH2	56.9444	19.1762	36.4357	0.938302	0.966948	0.0319119
MONOCYTES	AGE63	M	Gt092	PH2	30.1805	11.6505	18.1362	0.924069	0.936684	0.0621878
MONOCYTES	AGE67	F	Gt080	PH2	20.2825	11.8169	14.2112	0.926036	0.95295	0.0459884
MONOCYTES	AGE69	F	Gt095	PH2	29.5092	12.1659	25.1049	0.934316	0.961709	0.0370454
MONOCYTES	AGE70	F	Gt089	PH2	84.9129	28.4807	43.129	0.960385	0.970753	0.0282121
MONOCYTES	AGE70	M	Gt061	PH2	17.4894	2.7454	4.96409	0.851652	0.910689	0.0881835
MONOCYTES	AGE72	F	Gt071	PH2	66.7079	20.6546	25.2712	0.949522	0.970711	0.0283517
MONOCYTES	AGE72	M	Gt084	PH2	18.8604	11.3201	18.1303	0.918559	0.931038	0.0677552
MONOCYTES	AGE72	M	Gt109	PH2	38.1628	12.2982	17.8936	0.91291	0.916653	0.0820663
MONOCYTES	AGE72	M	Gt065	PH2	54.1175	18.8467	30.0362	0.946785	0.968522	0.0303661
MONOCYTES	AGE76	M	Gt098	PH2	41.071	16.8811	34.6567	0.923717	0.9507	0.0481318
MONOCYTES	AGE81	F	Gt083	PH2	5.66711	5.83528	9.77984	0.896127	0.78868	0.210156
MONOCYTES	AGE81	M	Gt110	PH2	61.8783	18.1428	34.289	0.941949	0.967856	0.0310157
MONOCYTES	AGE81	M	Gt108	PH2	39.9393	18.7517	35.7116	0.94657	0.967488	0.0312301
NK	AGE22	M	Gt073	PH2	142.255	31.7199	9.12727	0.950689	0.956513	0.0425136
NK	AGE25	F	Gt085	PH2	118.209	28.2846	16.4342	0.948095	0.947585	0.0515468
NK	AGE25	M	Gt046	PH2	159.228	50.9718	33.4198	0.954234	0.954098	0.044767
NK	AGE26	F	Gt051	PH2	119.263	59.7805	27.7817	0.954295	0.960292	0.0383015
NK	AGE26	F	Gt045	PH2	82.4955	23.5644	20.6182	0.928662	0.944713	0.0542627
NK	AGE27	F	Gt055	PH2	114.827	40.7487	24.149	0.9537	0.933853	0.0650426
NK	AGE31	F	Gt090	PH2	37.7092	18.3309	12.9963	0.909589	0.837692	0.160938
NK	AGE33	M	Gt042	PH2	194.348	55.4383	29.4815	0.960985	0.963336	0.0356063
NK	AGE35	M	Gt104	PH2	93.6314	32.8626	28.0107	0.925402	0.944762	0.0541929
NK	AGE37	M	Gt064	PH2	152.763	42.4104	23.5941	0.952428	0.908182	0.0907588
NK	AGE38	M	Gt093	PH2	175.394	46.9097	23.1398	0.950411	0.956766	0.0422433
NK	AGE42	F	Gt059	PH2	203.359	56.9344	40.5208	0.965683	0.960546	0.0385181
NK	AGE47	F	Gt078	PH2	156.675	63.1995	32.0258	0.957227	0.962135	0.0366356
NK	AGE47	M	Gt060	PH2	230.183	67.7497	25.292	0.965308	0.971448	0.0272329
NK	AGE52	F	Gt063	PH2	110.217	28.692	13.8095	0.953546	0.960497	0.0382814
NK	AGE52	M	Gt056	PH2	120.837	45.6045	33.1171	0.949091	0.959284	0.0396274
NK	AGE54	M	Gt057	PH2	145.92	46.6965	43.5985	0.953725	0.955154	0.0437824
NK	AGE62	F	Gt070	PH2	132.233	36.8142	30.9915	0.949954	0.956024	0.0431153
NK	AGE63	F	Gt101	PH2	204.841	48.4729	26.1485	0.955467	0.959387	0.0395512
NK	AGE63	M	Gt092	PH2	44.2151	24.3801	13.5758	0.900482	0.815285	0.183284
NK	AGE67	F	Gt080	PH2	71.194	35.3457	10.7028	0.953138	0.96562	0.0331027
NK	AGE69	F	Gt095	PH2	70.3919	25.3517	12.8611	0.901105	0.866533	0.132152
NK	AGE70	F	Gt089	PH2	73.5624	32.7119	17.8255	0.930601	0.94329	0.0555423
NK	AGE70	M	Gt061	PH2	158.15	39.3888	25.2874	0.955054	0.956133	0.0429581
NK	AGE72	F	Gt071	PH2	137.253	36.3336	24.0677	0.935224	0.9365	0.0622351
NK	AGE72	M	Gt084	PH2	59.9038	29.7565	15.9782	0.92883	0.926329	0.0723249
NK	AGE72	M	Gt109	PH2	29.872	14.4925	6.32315	0.881445	0.781902	0.216294
NK	AGE72	M	Gt065	PH2	195.543	53.2485	30.0295	0.959736	0.968956	0.0297416
NK	AGE76	M	Gt098	PH2	58.5754	31.3254	20.4335	0.916943	0.925281	0.0733796
NK	AGE81	F	Gt083	PH2	120.727	30.514	16.9168	0.929963	0.931778	0.0670086
NK	AGE81	M	Gt110	PH2	153.612	39.6467	34.0785	0.946202	0.946573	0.0523883
NK	AGE81	M	Gt108	PH2	148.877	61.6615	41.0105	0.951781	0.954202	0.0445871
