# Supplementary material for: Epigenetic signature of human immune aging in the GESTALT study
Source: eLife. 2023 Aug 17;12:e86136. doi: 10.7554/eLife.86136 (PMC10506794; doi:10.7554/eLife.86136)
Supplement: Supplementary file 9. — FDR p-values derived from the linear regression of expression levels of the three transcription factors (TFs) with age in each of the six cell types. [file elife-86136-supp9.xlsx]

## Sheet: Table S9
Supplementary File 9: Age-associated differences of transcripts for ARNT, REST and CTCF.
	BN	CD4N	CD8N	granulocytes	monocytes	NK
ARNT	<10-11	<10-11	<10-11	<10-11	<10-11	<10-11
CTCF	<10-11	<10-11	<10-11	<10-10	<10-11	<10-11
REST	0.05	<0.001	N.S.	<10-7	<0.01	<0.05
Cyan- negative relationship between gene expression and age
Magenta- positive relationship between gene expression and age
*unadjusted p-values from linear regression
