# Supplementary material for: Epigenetic signature of human immune aging in the GESTALT study
Source: eLife. 2023 Aug 17;12:e86136. doi: 10.7554/eLife.86136 (PMC10506794; doi:10.7554/eLife.86136)
Supplement: Supplementary file 10. — The age-associated probes with ARNT or REST motifs within 1 kb region were annotated to genes and summarized into a table. For each gene, number of age-associated CpG sites with ARNT/REST motif and number of cell types in which this occurrence has been observed have been mentioned. [file elife-86136-supp10.xlsx]

## Sheet: Table S10
Supplementary File 10: List of genes with age-associated methylated CpG sites
showing ARNT or REST motif within 1kb
genename	#cpgsites_ ARNT/RESTmotifs_1kb	#celltypes_withARNT/REST_motif1kb	group
PRDM16	46	6	agehypomethylated_genes_ARNT1kb
NAV2	15	6	agehypomethylated_genes_ARNT1kb
IFT140	14	6	agehypomethylated_genes_ARNT1kb
PLEKHG4B	9	6	agehypomethylated_genes_ARNT1kb
FAM65C	7	6	agehypomethylated_genes_ARNT1kb
AHNAK	6	6	agehypomethylated_genes_ARNT1kb
FGF1	6	6	agehypomethylated_genes_ARNT1kb
NOSTRIN	6	6	agehypomethylated_genes_ARNT1kb
ATP13A2	6	6	agehypomethylated_genes_ARNT1kb
SETBP1	5	6	agehypomethylated_genes_ARNT1kb
GIT1	5	6	agehypomethylated_genes_ARNT1kb
CALN1	5	6	agehypomethylated_genes_ARNT1kb
KALRN	5	6	agehypomethylated_genes_ARNT1kb
HTR2A	4	6	agehypomethylated_genes_ARNT1kb
ERC2	4	6	agehypomethylated_genes_ARNT1kb
PLB1	4	6	agehypomethylated_genes_ARNT1kb
LGR6	4	6	agehypomethylated_genes_ARNT1kb
TBC1D10A	3	6	agehypomethylated_genes_ARNT1kb
MYO5B	3	6	agehypomethylated_genes_ARNT1kb
ADAM11	3	6	agehypomethylated_genes_ARNT1kb
TARSL2	3	6	agehypomethylated_genes_ARNT1kb
FXR1	3	6	agehypomethylated_genes_ARNT1kb
EGFEM1P	3	6	agehypomethylated_genes_ARNT1kb
CBFA2T2	2	6	agehypomethylated_genes_ARNT1kb
CSNK1D	2	6	agehypomethylated_genes_ARNT1kb
MAP1B	2	6	agehypomethylated_genes_ARNT1kb
MYL3	2	6	agehypomethylated_genes_ARNT1kb
LYPLAL1	2	6	agehypomethylated_genes_ARNT1kb
GPR177	2	6	agehypomethylated_genes_ARNT1kb
PINK1	2	6	agehypomethylated_genes_ARNT1kb
CRYL1	1	6	agehypomethylated_genes_ARNT1kb
HMGA2	1	6	agehypomethylated_genes_ARNT1kb
TPST1	1	6	agehypomethylated_genes_ARNT1kb
LIPT1	1	6	agehypomethylated_genes_ARNT1kb
CHST8	12	6	agehypermethylated_genes_REST1kb
NXPH1	12	6	agehypermethylated_genes_REST1kb
SCGN	9	6	agehypermethylated_genes_REST1kb
GPR78	8	6	agehypermethylated_genes_REST1kb
SST	7	6	agehypermethylated_genes_REST1kb
STXBP5L	7	6	agehypermethylated_genes_REST1kb
SLC12A5	6	6	agehypermethylated_genes_REST1kb
CHGA	5	6	agehypermethylated_genes_REST1kb
LHFPL4	5	6	agehypermethylated_genes_REST1kb
ANKRD34C	4	6	agehypermethylated_genes_REST1kb
LRTM2	4	6	agehypermethylated_genes_REST1kb
SYT7	4	6	agehypermethylated_genes_REST1kb
PRLHR	4	6	agehypermethylated_genes_REST1kb
KCNK12	4	6	agehypermethylated_genes_REST1kb
CELF6	3	6	agehypermethylated_genes_REST1kb
BRUNOL6	3	6	agehypermethylated_genes_REST1kb
GRIN1	3	6	agehypermethylated_genes_REST1kb
CALB1	3	6	agehypermethylated_genes_REST1kb
VGF	3	6	agehypermethylated_genes_REST1kb
GLRA1	3	6	agehypermethylated_genes_REST1kb
AP3B2	2	6	agehypermethylated_genes_REST1kb
TMEM181	2	6	agehypermethylated_genes_REST1kb
PTPRN	2	6	agehypermethylated_genes_REST1kb
FAM123C	2	6	agehypermethylated_genes_REST1kb
NCAN	1	6	agehypermethylated_genes_REST1kb
shown in Figure 5C
