# Supplementary material for: Epigenetic signature of human immune aging in the GESTALT study
Source: eLife. 2023 Aug 17;12:e86136. doi: 10.7554/eLife.86136 (PMC10506794; doi:10.7554/eLife.86136)
Supplement: Supplementary file 11. — Summary of two beta-regression models has been tabularized. Column C shows the number of age-associated probes from the original model CpG ~ age + sex with FDR cutoff of adjusted page < 0.05. Columns D–J show the number of age-associated probes from the model CpG ~ age + sex + analyte with FDR cutoff of adjusted page < 0.05 and adjusted panalyte < 0.05. Finally, columns K–Q represent the number of age-associated probes from the model CpG ~ age + sex + analyte with FDR cutoff of adjusted panalyte < 0.05. [file elife-86136-supp11.xlsx]

## Sheet: Table S11
Supplementary File 11- Output of beta regression analysis with age and sex and the seven analytes
Cell	Group	n(padj_age<0.05)	n(padj_age;IL6<0.05)	n(padj_age;IL1Ra<0.05)	n(padj_age;IL1a<0.05)	n(padj_age;IL1b<0.05)	n(padj_age;TNFa<0.05)	n(padj_age;TNFsRI<0.05)	n(padj_age;TNFsRII<0.05)	n(padj_IL6<0.05)	n(padj_IL1Ra<0.05)	n(padj_IL1a<0.05)	n(padj_IL1b<0.05)	n(padj_TNFa<0.05)	n(padj_TNFsRI<0.05)	n(padj_TNFsRII<0.05)
B	hypomethylated with age	6507	6507	6507	6507	6507	6507	6504	6507	0	0	0	0	27	0	1
B	hypermethylated with age	3863	3863	3863	3863	3863	3863	3863	3863	0	0	0	3	124	1	0
CD4	hypomethylated with age	63563	63563	63556	63562	63562	63498	58744	63539	8	1	0	5	4	30	21
CD4	hypermethylated with age	41083	41082	41080	41082	41083	41064	36967	41052	4	5	5	0	9	7507	9058
CD8	hypomethylated with age	1850	1850	1850	1850	1850	1850	1850	1850	1	3	0	7	5	2	0
CD8	hypermethylated with age	1703	1703	1703	1703	1703	1703	1703	1703	2	0	0	0	0	0	0
gran	hypomethylated with age	4627	4627	4627	4627	4627	4627	4574	4627	0	0	1	0	1	1	0
gran	hypermethylated with age	1331	1331	1331	1331	1331	1331	1317	1331	0	0	0	0	1	0	1
mono	hypomethylated with age	8217	8217	8217	8217	8217	8217	8040	8217	0	0	0	0	10	13	1
mono	hypermethylated with age	5411	5411	5411	5411	5411	5410	5364	5411	0	1	0	0	65	0	3
NK	hypomethylated with age	4148	4148	4148	4148	4148	4148	4137	4148	0	0	5	0	8	4	0
NK	hypermethylated with age	623	623	623	623	623	623	621	622	0	15	0	0	2	2	3
