# Supplementary material for: Epigenetic signature of human immune aging in the GESTALT study
Source: eLife. 2023 Aug 17;12:e86136. doi: 10.7554/eLife.86136 (PMC10506794; doi:10.7554/eLife.86136)
Supplement: Supplementary file 12. [file elife-86136-supp12.xlsx]

## Sheet: Sheet1
Software and algorithms
Package/software	publication	Link
GenomeStudio 2011.1	Illumina	https://www.illumina.com/ techniques/microarrays/array- data-analysis-experimental- design/genomestudio.html
FlowJo v10	FlowJo	https://www.flowjo.com
GraphPad Prism v8	GraphPad Software	https://www.graphpad.com
R Studio 3.6.0	The R Foundation	https://www.r-project.org
DESeq2 v1.30.1	Love et al., 2014	https://doi.org/10.18129/B9. bioc.DESeq2
minfi 1.38.0	Aryee et al., 2014	https://doi.org/10.18129/B9. bioc.minfi
sva v3.48.0	Leek et al.,	Leek JT, Johnson WE, Parker HS, Fertig EJ, Jaffe AE, Zhang Y, Storey JD, Torres LC (2023). sva: Surrogate Variable Analysis. R package version 3.48.0.
SuperExactTest (v.1.1.0)	Wang et al, 2015	https://www.nature.com/articles/srep16923
Deeptools 3.5.1	Ramı´rez et al., 2016	https://doi.org/10.1093/nar/ gkw257
tmod v.0.46.2	Weinet et al, 2016	https://peerj.com/preprints/2420v1/
Bedops 2.4.40	Neph et al., 2012	https://doi.org/10.1093/ bioinformatics/bts277
HOMER 4.11.1	Heinz et al., 2010	https://doi.org/10.1016/j.molcel. 2010.05.004
FastQC 0.11.9	Andrews, 2010	https://www.bioinformatics. babraham.ac.uk/projects/ fastqc/
Kallisto	Bray et.al, 2016	https://github.com/pachterlab/kallisto
